# Supplementary material for: 5-Formylcytosine weakens the G–C pair and imparts local conformational fluctuations to DNA duplexes
Source: Royal Society of Chemistry journal article supplement (doi:10.1039/d2cp04837j), 2022-12-05
Supplement: d2cp04837j1.pdf [file d2cp04837j1.pdf]

## Supplementary Information

### 5-Formylcytosine Weakens the G-C Pair and Imparts Local Conformational Fluctuations to DNA Duplexes

Manjula Jaisal,<sup>†</sup> Rajesh Kumar Reddy Sannapureddi,<sup>†</sup> Arjun Rana, Bharathwaj Sathyamoorthy<sup>\*</sup>

Department of Chemistry, Indian Institute of Science Education and Research, Bhopal 462066, India

<sup>\*</sup>To whom correspondence should be addressed. Tel: +91-755-269-1323; Fax: +91-755-269-2392;  
Email: [bharathwaj@iiserb.ac.in](mailto:bharathwaj@iiserb.ac.in)

#### Table of Contents:

1. Details of sparse sampling method optimization
2. <sup>13</sup>C-<sup>1</sup>H F2-coupled HSQC spectra obtained for DNA<sup>F3</sup>
3. NMR data tables for DNA<sup>control</sup> and DNA<sup>N#</sup>
4. <sup>13</sup>C/<sup>15</sup>N chemical shift and <sup>1</sup>J<sub>C-H</sub> perturbations for all the nucleotides across samples (DNA<sup>N#</sup>) compared to DNA<sup>control</sup>
5. Statistics of structure refinement constraints
6. Cartoon model comparison and structural parameters analyzed for DNA<sup>control</sup> and DNA<sup>N#</sup>
7. RDC RMSD tables

## 1. Details of sparse sampling method optimization

Acquisition of  $^{13}\text{C}/^{15}\text{N}$  data requires isotope enrichment or natural isotopic abundance samples at high concentration ( $> 1$  mM). Preparation of isotopically enriched DNA is expensive due to the inherent cost of  $^{13}\text{C}/^{15}\text{N}$  labeled nucleotide triphosphates and phosphoramidites. In particular, the precursors for modified nucleotides are seldom prepared with  $^{13}\text{C}/^{15}\text{N}$  isotope labeling restricting NMR to natural abundance samples.<sup>1</sup> Additionally, modified DNA samples are often limited in concentration due to poor yields limiting NMR to proton-based studies. For instance, DNA<sup>F3</sup> samples prepared in this study, following HPLC purification, provided an overall sample concentration of 90  $\mu\text{M}$  at natural abundance (i.e., 0.9  $\mu\text{M}$   $^{13}\text{C}$  and 0.4  $\mu\text{M}$   $^{15}\text{N}$ ).

Numerous NMR methods have been developed in the past decade to address acquiring multidimensional data for sensitivity-limited samples.<sup>2,3</sup> Under-sampling in the indirect dimension relative to conventionally Nyquist methods presents itself as an attractive alternative immensely reducing measurement times.<sup>2,3</sup> We investigated the effectiveness of sparse sampling methodology by adopting the Poisson-Gap sampling (along  $^{13}\text{C}$  dimension) that has been proved effective for measuring two-dimensional (2D) heteronuclear correlation data.<sup>4</sup> To assess the optimum under-sampling rate,  $^{13}\text{C}$ - $^1\text{H}$  data spectra were acquired at 5-95% of the conventional experiment for the natural abundance DNA<sup>control</sup> sample (2.7 mM), with otherwise identical experimental parameters (number of scans, spectral width, recycle delay, acquisition times, etc.). The data were processed with a compressed sensing methodology<sup>5</sup> that provides high fidelity with frequency and intensity measurement. The spectra were benchmarked on their ability to measure  $^{13}\text{C}$  and  $^1\text{H}$  chemical shifts reliably compared to the conventional 2D experiment.

Reduction of sampling rate is accompanied with loss of precision in the measurement of  $^{13}\text{C}$  and  $^1\text{H}$  shifts (Figure S1A and S1B). Reduction of sampling rate to 25% in the indirect dimension produces a root-mean-square-deviation (RMSD) of 4 (0.7 Hz) and 2 (1.7 Hz) ppb for  $^{13}\text{C}$  and  $^1\text{H}$  shifts, respectively, for cross-peaks across the aromatic (C2, C6/C8) and sugar (C1' and C2') moieties with mean absolute deviations of  $< 0.2$  Hz. Subsequent reduction of the sampling rate (i.e.,  $< 25\%$ ) increases the RMSD to 0.8-3.0 and 2.0-4.0 Hz for  $^{13}\text{C}$  and  $^1\text{H}$  chemical shifts, respectively, and introduces spectral artifacts (Figure S1A) reducing overall resolution in the severely aliased spectrum. Thus, 25% sampling provided the optimum time reduction and the necessary precision required for heteronuclear correlation.

Robustness of the 25% sampling was tested with 2D  $^{13}\text{C}$ - $^1\text{H}$  spectra for DNA<sup>control</sup> sample at one-tenth concentration (270  $\mu\text{M}$ ) with conventional 100% (control) and sparse 25% sampling (total measurement time of 5.3 hours). The time saved for 25% sampling method was compensated by increasing the number of scans by four times. Increased scans achieve a better signal averaging and consequently a two-fold improvement in "apparent" signal-to-noise ratio<sup>6</sup> (Figures S1C) for the sparsely sampled data. Both 25% and 100% sampling datasets reproduced with  $^{13}\text{C}$  and  $^1\text{H}$  chemical shift RMSD of 1-2 Hz with mean absolute deviation of  $< 0.7$  Hz. These optimized sparse sampling parameters were employed in the subsequent data acquisition of all the modified samples and also for 2D  $^{15}\text{N}$ - $^1\text{H}$  SOFAST-HMQC data acquisition.

With frequencies reliably measured, we probed the ability of the experiment to measure one-bond  $^{13}\text{C}$ - $^1\text{H}$  scalar coupling ( $^1J_{\text{CH}}$ ). 2D HSQC spectrum was acquired without decoupling during acquisition providing  $^1J_{\text{CH}}$  the  $^1\text{H}$  dimension, while the  $^{13}\text{C}$  sparsely sampled dimension provided the necessary spectral resolution for the analysis. 25% sampling provides an overall  $^1J_{\text{CH}}$  RMSD of 1.2 Hz (for sugar C1'-H1' and nucleobase C2/5/6/8-H2/5/6/8 bonds) and mean deviation of -0.3 Hz, making these measurements amenable for scalar and residual dipolar coupling studies.

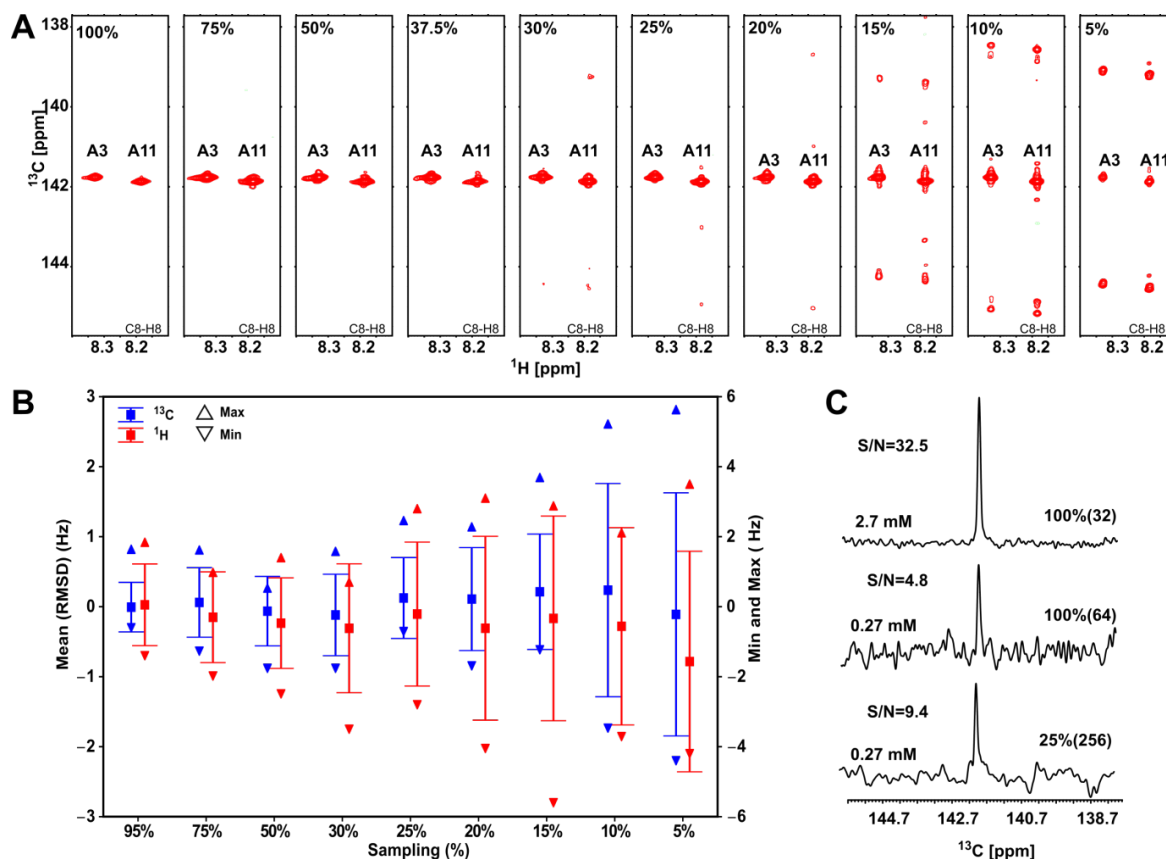

**Figure S1:** (A)  $^{13}\text{C}$ - $^1\text{H}$  spectra acquired with varied sampling % in  $^{13}\text{C}$  dimension for DNA<sup>control</sup> sample (2.7 mM), resonance peaks/contours are shown for **A3**-C8/H8 and **A11**-C8/H8. Both resonances are well represented even at 5% sampling. Spectral artifacts in the  $^{13}\text{C}$  dimension starts showing up below 25% sampling on upfield and downfield to actual chemical shifts, complicating the spectral analysis. (B) Chemical shift values of  $^{13}\text{C}$  and  $^1\text{H}$  (in Hz) for C6, C8, C1', C2' and H6, H8, H1', H2', H2'' were acquired at variable samplings % were compared with data acquired at 100% sampling (DNA<sup>control</sup>, 2.7 mM), mean absolute deviations with RMSD were for plotted (■ for mean and error bars for RMSD), also maximum deviation and minimum deviation were shown as ▲, and ▼, respectively. At each sampling %  $^{13}\text{C}$  (blue) and  $^1\text{H}$  (red) are shown individually. Y-axis on left represents mean and RMSD in Hz, scale on the right represent for minimum and maximum deviations in Hz. (C) Comparison of signal to noise ratio (S/N) for traces in the  $^{13}\text{C}$  dimension, for DNA<sup>control</sup> at 2.7 mM and 0.27 mM. With concentrated sample (2.7 mM) at 100% sampling S/N of 32.5 is observed, with low concentration (0.27 mM) sample S/N is 4.8 at 100% sampling and 64 scans, apparent S/N increased to 9.4 with one fourth sampling (25%) and 4 times more scans (ns 256) nearly doubled apparent S/N is observed with same amount experimental time.

## 2. HSQC spectra obtained for DNA<sup>F3</sup>

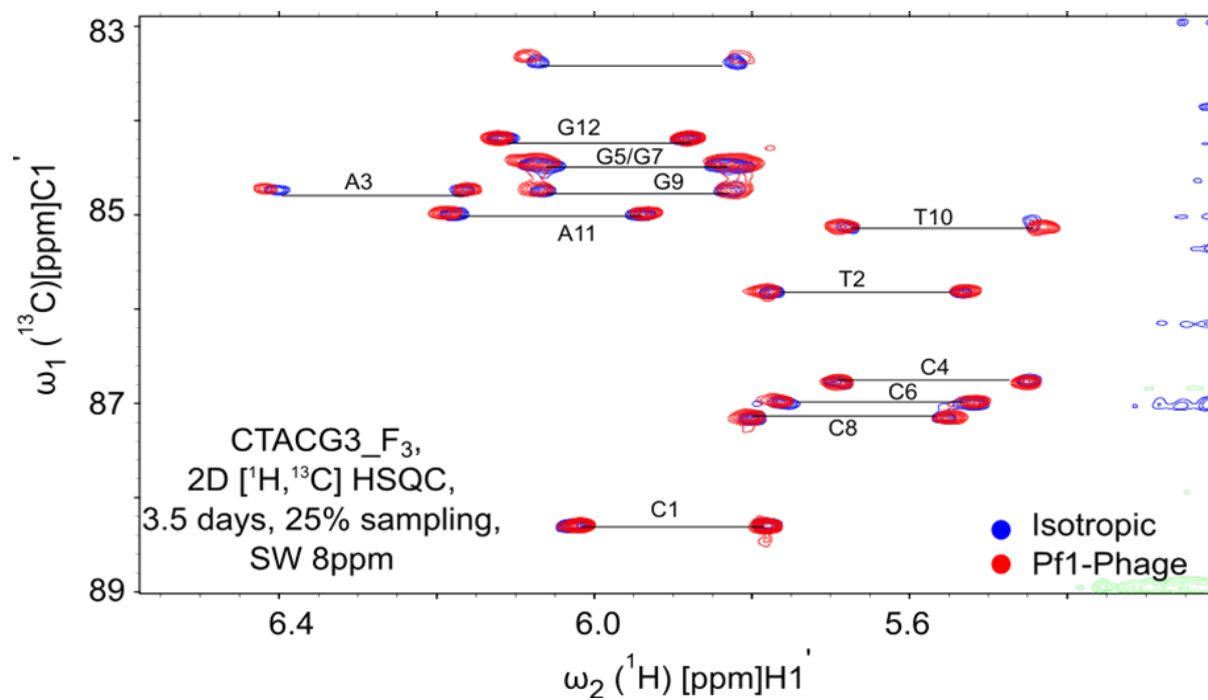

**Figure S2:** Overlaid  $^{13}\text{C}$ - $^1\text{H}$  spectra with F2-coupling acquired with 25% in  $^{13}\text{C}$  dimension for DNA<sup>F3</sup> sample. C1'-H1' region of spectra is shown. Data acquired in isotropic conditions used for measuring  $^1J_{\text{C1}'\text{-H1}'}$  is shown in blue and anisotropic conditions (~20-25 mg/mL Pf1-phage) used for  $^1(\text{J}+\text{D})_{\text{C1}'\text{-H1}'}$  measurements are shown in red.

### 3. NMR data tables for DNA and DNA<sup>N#</sup>

**Table S1:** NMR data tables for chemical shifts, J-couplings and dipolar couplings

| DNA <sup>control</sup> d(CTACGCGCGTAG) <sub>2</sub> |      |      |      |      |      |       |       |      |      |              |              |       |       |      |      |                                            |                                 |                                   |                                            |                                 |                                        |                                                    |                                                     |
|-----------------------------------------------------|------|------|------|------|------|-------|-------|------|------|--------------|--------------|-------|-------|------|------|--------------------------------------------|---------------------------------|-----------------------------------|--------------------------------------------|---------------------------------|----------------------------------------|----------------------------------------------------|-----------------------------------------------------|
| Nt                                                  | C1'  | H1'  | C2'  | H2'  | H2'' | C6/C8 | H6/H8 | C4'  | H4'  | C2/C5<br>/C7 | H2/H5<br>/H7 | N1/N3 | H1/H3 | H41  | H42  | <sup>1</sup> J <sub>C6/C8-<br/>H6/H8</sub> | <sup>1</sup> J <sub>C2-H2</sub> | <sup>1</sup> J <sub>C1'-H1'</sub> | <sup>1</sup> D <sub>C6/C8<br/>-H6/H8</sub> | <sup>1</sup> D <sub>C2-H2</sub> | <sup>1</sup> D <sub>C1'-<br/>H1'</sub> | ΣH1'<br>( <sup>3</sup> J <sub>H2'-<br/>H1'</sub> ) | ΣH1'<br>( <sup>3</sup> J <sub>H2''-<br/>H1'</sub> ) |
| C1                                                  | 88.3 | 5.91 | 40.7 | 2.15 | 2.56 | 143.2 | 7.85  | 88.2 | 4.11 | 99.4         | 5.96         |       |       |      |      | 182.7                                      |                                 | 172.2                             | 15.7                                       |                                 | -6.0                                   | 13.7                                               | 12.8                                                |
| T2                                                  | 85.9 | 5.69 | 39.0 | 2.23 | 2.52 | 139.7 | 7.55  | 86.4 | 4.19 | 14.50        | 1.73         | 159.3 | 13.69 |      |      | 179.2                                      |                                 | 165.9                             | 12.3                                       |                                 | 11.0                                   | 13.3                                               | 17.0                                                |
| A3                                                  | 84.9 | 6.23 | 40.2 | 2.74 | 2.89 | 141.8 | 8.33  | 87.5 | 4.43 | 154.8        | 7.59         |       |       |      |      | 213.7                                      | 201.6                           | 165.9                             | 15.6                                       | 10.2                            | 12.2                                   | 14.0                                               | 16.1                                                |
| C4                                                  | 86.1 | 5.55 | 39.8 | 1.93 | 2.31 | 142.1 | 7.24  | 85.2 | 4.16 | 98.4         | 5.27         |       |       | 8.17 | 6.51 | 178.6                                      |                                 | 165.9                             | 20.0                                       |                                 | 3.5                                    | -                                                  | 16.5                                                |
| G5                                                  | 84.5 | 5.84 | 40.4 | 2.59 | 2.70 | 138.1 | 7.81  | 87.2 | 4.34 |              |              | 147.0 | 12.85 |      |      | 212.8                                      |                                 | 163.1                             | 16.5                                       |                                 | 14.1                                   | 14.4                                               | 16.1                                                |
| C6                                                  | 86.3 | 5.64 | 39.9 | 1.95 | 2.35 | 142.2 | 7.23  | 85.4 | 4.13 | 98.5         | 5.28         |       |       | 8.27 | 6.33 | 178.2                                      |                                 | 166.4                             | 21.0                                       |                                 | 12.6                                   | 13.1                                               | 16.8                                                |
| G7                                                  | 84.4 | 5.85 | 40.5 | 2.59 | 2.70 | 138.1 | 7.85  | 87.2 | 4.34 |              |              | 147.0 | 12.91 |      |      | 212.8                                      |                                 | 163.0                             | 16.7                                       |                                 | 10.8                                   | 14.0                                               | 16.2                                                |
| C8                                                  | 86.3 | 5.65 | 40.0 | 2.00 | 2.36 | 142.2 | 7.25  | 85.4 | 4.14 | 98.6         | 5.31         |       |       | 8.27 | 6.34 | 177.8                                      |                                 | 166.1                             | 18.8                                       |                                 | 11.3                                   | 13.4                                               | 16.9                                                |
| G9                                                  | 84.6 | 5.92 | 40.5 | 2.59 | 2.73 | 138.4 | 7.87  | 87.2 | 4.34 |              |              | 147.0 | 12.77 |      |      | 213.5                                      |                                 | 165.3                             | 17.9                                       |                                 | 11.9                                   | 14.0                                               | 16.1                                                |
| T10                                                 | 85.2 | 5.57 | 39.1 | 1.94 | 2.25 | 138.5 | 7.20  | 85.4 | 4.12 | 14.5         | 1.53         | 158.5 | 13.64 |      |      | 177.1                                      |                                 | 167.6                             | 14.6                                       |                                 | 9.5                                    | 13.7                                               | 16.8                                                |
| A11                                                 | 85.0 | 6.06 | 40.1 | 2.68 | 2.86 | 141.9 | 8.18  | 87.5 | 4.39 | 154.3        | 7.55         |       |       |      |      | 212.8                                      | 202.3                           | 166.6                             | 11.6                                       | 13.4                            | 11.2                                   | 13.8                                               | 16.3                                                |
| G12                                                 | 84.2 | 6.01 | 42.4 | 2.26 | 2.43 | 138.5 | 7.71  | 87.4 | 4.17 |              |              |       |       |      |      | 211.4                                      |                                 | 163.8                             | 9.0                                        |                                 | 7.6                                    | 16.1                                               | 13.8                                                |

| DNA <sup>M6</sup> d(CTACG <sup>5m</sup> CGCGTAG) <sub>2</sub> |      |      |      |      |      |       |       |      |      |              |              |       |       |      |      |                                            |                                 |                                   |                                            |                                 |                                        |                                                    |                                                    |
|---------------------------------------------------------------|------|------|------|------|------|-------|-------|------|------|--------------|--------------|-------|-------|------|------|--------------------------------------------|---------------------------------|-----------------------------------|--------------------------------------------|---------------------------------|----------------------------------------|----------------------------------------------------|----------------------------------------------------|
| Nt                                                            | C1'  | H1'  | C2'  | H2'  | H2'' | C6/C8 | H6/H8 | C4'  | H4'  | C2/C5<br>/C7 | H2/H5<br>/H7 | N1/N3 | H1/H3 | H41  | H42  | <sup>1</sup> J <sub>C6/C8-<br/>H6/H8</sub> | <sup>1</sup> J <sub>C2-H2</sub> | <sup>1</sup> J <sub>C1'-H1'</sub> | <sup>1</sup> D <sub>C6/C8-<br/>H6/H8</sub> | <sup>1</sup> D <sub>C2-H2</sub> | <sup>1</sup> D <sub>C1'-<br/>H1'</sub> | ΣH1'<br>( <sup>3</sup> J <sub>H2'-<br/>H1'</sub> ) | ΣH1'<br>( <sup>3</sup> J <sub>H2'-<br/>H1'</sub> ) |
| C1                                                            | 88.3 | 5.91 | 40.7 | 2.14 | 2.56 | 143.2 | 7.85  | 88.2 | 4.11 | 99.4         | 5.97         |       |       |      |      | 181.5                                      |                                 | 173.3                             | 15.2                                       |                                 | -8.2                                   | 13.3                                               |                                                    |
| T2                                                            | 85.9 | 5.68 | 39.0 | 2.23 | 2.52 | 139.7 | 7.54  | 86.4 | 4.19 | 14.5         | 1.73         | 159.3 | 13.72 |      |      | 177.6                                      |                                 | 167.7                             | 13.5                                       |                                 | 12.3                                   | 14.0                                               | 16.5                                               |
| A3                                                            | 84.9 | 6.23 | 40.2 | 2.74 | 2.89 | 141.8 | 8.32  | 87.5 | 4.43 | 154.8        | 7.58         |       |       |      |      | 212.8                                      | 200.6                           | 166.3                             | 14.0                                       | 12.3                            | 14.2                                   | 14.7                                               | 16.4                                               |
| C4                                                            | 86.1 | 5.55 | 39.8 | 1.97 | 2.31 | 142.1 | 7.25  | 85.2 | 4.17 | 98.4         | 5.27         |       |       | 8.15 | 6.52 | 177.3                                      |                                 | 166.5                             | 20.8                                       |                                 | 3.7                                    | 14.0                                               | -                                                  |
| G5                                                            | 84.6 | 5.92 | 40.5 | 2.53 | 2.78 | 138.2 | 7.80  | 87.2 | 4.34 |              |              | 147.0 | 12.85 |      |      | 212.1                                      |                                 | 164.9                             | 17.5                                       |                                 | 14.4                                   | 13.4                                               | 16.5                                               |
| <sup>5m</sup> C6                                              | 86.0 | 5.57 | 39.8 | 1.95 | 2.32 | 138.8 | 7.04  | 85.6 | 4.17 | 15.1         | 1.54         |       |       | 8.60 | 5.99 | 176.9                                      |                                 | 166.5                             | 19.1                                       |                                 | 9.5                                    | 13.5                                               | -                                                  |
| G7                                                            | 84.5 | 5.84 | 40.5 | 2.61 | 2.69 | 138.1 | 7.83  | 87.2 | 4.34 |              |              | 147.1 | 12.94 |      |      | 212.0                                      |                                 | 164.0                             | 15.7                                       |                                 | 13.9                                   | 14.3                                               | 15.9                                               |
| C8                                                            | 86.4 | 5.71 | 40.1 | 2.02 | 2.39 | 142.2 | 7.27  | 85.6 | 4.17 | 98.6         | 5.29         |       |       | 8.25 | 6.31 | 177.0                                      |                                 | 166.9                             | 21.2                                       |                                 | 11.6                                   | 14.0                                               | 15.6                                               |
| G9                                                            | 84.6 | 5.91 | 40.5 | 2.59 | 2.73 | 138.3 | 7.86  | 87.2 | 4.33 |              |              | 146.9 | 12.75 |      |      | 213.7                                      |                                 | 163.7                             | 15.9                                       |                                 | 14.8                                   | 14.1                                               | 15.9                                               |
| T10                                                           | 85.2 | 5.57 | 39.1 | 1.94 | 2.26 | 138.5 | 7.20  | 85.5 | 4.12 | 14.5         | 1.52         | 158.5 | 13.65 |      |      | 177.5                                      |                                 | 166.6                             | 12.2                                       |                                 | 10.6                                   | -                                                  | 16.1                                               |
| A11                                                           | 85.0 | 6.06 | 40.1 | 2.68 | 2.86 | 141.9 | 8.18  | 87.4 | 4.39 | 154.3        | 7.55         |       |       |      |      | 213.8                                      | 204.0                           | 166.2                             | 8.8                                        | 13.77                           | 12.3                                   | 14.0                                               | 15.8                                               |
| G12                                                           | 84.2 | 6.01 | 42.4 | 2.27 | 2.43 | 138.5 | 7.71  | 87.4 | 4.17 |              |              |       |       |      |      | 211.4                                      |                                 | 163.6                             | 7.1                                        |                                 | 7.9                                    | 15.4                                               | 14.7                                               |

| DNA <sup>M8</sup> d(CTACGCG <sup>5m</sup> CGTAG) <sub>2</sub> |      |      |      |      |      |       |       |      |      |              |              |       |       |      |      |                                            |                                 |                                   |                                            |                                 |                                        |                                                    |                                                    |
|---------------------------------------------------------------|------|------|------|------|------|-------|-------|------|------|--------------|--------------|-------|-------|------|------|--------------------------------------------|---------------------------------|-----------------------------------|--------------------------------------------|---------------------------------|----------------------------------------|----------------------------------------------------|----------------------------------------------------|
| Nt                                                            | C1'  | H1'  | C2'  | H2'  | H2'' | C6/C8 | H6/H8 | C4'  | H4'  | C2/C5<br>/C7 | H2/H5<br>/H7 | N1/N3 | H1/H3 | H41  | H42  | <sup>1</sup> J <sub>C6/C8-<br/>H6/H8</sub> | <sup>1</sup> J <sub>C2-H2</sub> | <sup>1</sup> J <sub>C1'-H1'</sub> | <sup>1</sup> D <sub>C6/C8-<br/>H6/H8</sub> | <sup>1</sup> D <sub>C2-H2</sub> | <sup>1</sup> D <sub>C1'-<br/>H1'</sub> | ΣH1'<br>( <sup>3</sup> J <sub>H2'-<br/>H1'</sub> ) | ΣH1'<br>( <sup>3</sup> J <sub>H2'-<br/>H1'</sub> ) |
| C1                                                            | 88.3 | 5.91 | 40.7 | 2.15 | 2.56 | 143.2 | 7.85  | 88.3 | 4.11 | 99.4         | 5.96         |       |       |      |      | 182.7                                      |                                 | 172.7                             | 13.6                                       |                                 | -6.5                                   | 14.0                                               |                                                    |
| T2                                                            | 85.9 | 5.69 | 39.0 | 2.24 | 2.52 | 139.8 | 7.55  | 86.4 | 4.19 | 14.5         | 1.73         | 159.2 | 13.71 |      |      | 178.8                                      |                                 | 166.0                             | 13.6                                       |                                 | 11.1                                   | 13.6                                               | 17.5                                               |
| A3                                                            | 84.9 | 6.25 | 40.3 | 2.74 | 2.91 | 141.8 | 8.33  | 87.5 | 4.44 | 154.8        | 7.58         |       |       |      |      | 214.5                                      | 201.3                           | 166.2                             | 13.3                                       | 10.7                            | 14.0                                   | 13.8                                               | 16.8                                               |
| C4                                                            | 86.1 | 5.56 | 39.7 | 1.93 | 2.33 | 142.0 | 7.23  | 85.2 | 4.16 | 98.4         | 5.28         |       |       | 8.21 | 6.50 | 178.6                                      |                                 | 165.3                             | 16.3                                       |                                 | 5.7                                    | 13.3                                               | 17.1                                               |
| G5                                                            | 84.5 | 5.82 | 40.6 | 2.58 | 2.68 | 138.2 | 7.82  | 87.2 | 4.33 |              |              | 147.0 | 12.89 |      |      | 212.2                                      |                                 | 162.6                             | 13.9                                       |                                 | 14.1                                   | 13.5                                               | -                                                  |
| C6                                                            | 86.3 | 5.68 | 39.9 | 2.01 | 2.38 | 142.2 | 7.26  | 85.6 | 4.16 | 98.4         | 5.27         |       |       | 8.24 | 6.31 | 177.1                                      |                                 | 168.5                             | 19.9                                       |                                 | 11.8                                   | 12.7                                               | 17.5                                               |
| G7                                                            | 84.6 | 5.93 | 40.4 | 2.55 | 2.79 | 138.2 | 7.83  | 87.2 | 4.33 |              |              | 147.0 | 12.89 |      |      | 211.5                                      |                                 | 164.3                             | 19.2                                       |                                 | 13.1                                   | -                                                  | -                                                  |
| <sup>5m</sup> C8                                              | 86.1 | 5.56 | 39.8 | 1.98 | 2.31 | 138.9 | 7.06  | 85.6 | 4.16 | 15.1         | 1.57         |       |       | 8.55 | 6.05 | 176.6                                      |                                 | 165.7                             | 20.0                                       |                                 | 9.1                                    | 13.7                                               | 16.5                                               |
| G9                                                            | 84.7 | 5.90 | 40.6 | 2.58 | 2.71 | 138.3 | 7.83  | 87.2 | 4.33 |              |              | 147.0 | 12.75 |      |      | 213.7                                      |                                 | 164.8                             | 15.4                                       |                                 | 13.9                                   | -                                                  | -                                                  |
| T10                                                           | 85.3 | 5.60 | 39.1 | 1.96 | 2.27 | 138.6 | 7.21  | 85.6 | 4.13 | 14.5         | 1.51         | 158.5 | 13.63 |      |      | 177.9                                      |                                 | 167.6                             | 11.5                                       |                                 | 11.7                                   | 13.3                                               | 17.4                                               |
| A11                                                           | 85.0 | 6.06 | 40.1 | 2.68 | 2.86 | 141.9 | 8.19  | 87.4 | 4.39 | 154.3        | 7.50         |       |       |      |      | 213.8                                      | 201.9                           | 166.2                             | 9.1                                        | 11.9                            | 12.4                                   | 13.7                                               | 16.8                                               |
| G12                                                           | 84.2 | 6.01 | 42.4 | 2.27 | 2.43 | 138.5 | 7.71  | 87.4 | 4.17 |              |              |       |       |      |      | 212.2                                      |                                 | 164.0                             | 7.8                                        |                                 | 7.9                                    | 16.8                                               | 13.3                                               |

**DNA<sup>M3</sup> d(CTA<sup>5m</sup>CG<sup>5m</sup>CG<sup>5m</sup>CGTAG)<sub>2</sub>**

| Nt               | C1'  | H1'  | C2'  | H2'  | H2'' | C6/C8 | H6/H8 | C4'  | H4'  | C2/C5<br>/C7 | H2/H5<br>/H7 | N1/N3 | H1/H3 | H41  | H42  | <sup>1</sup> J <sub>C6/C8-<br/>H6/H8</sub> | <sup>1</sup> J <sub>C2-H2</sub> | <sup>1</sup> J <sub>C1'-H1'</sub> | <sup>1</sup> D <sub>C6/C8<br/>-H6/H8</sub> | <sup>1</sup> D <sub>C2-H2</sub> | <sup>1</sup> D <sub>C1'-<br/>H1'</sub> | ΣH1'<br>( <sup>3</sup> J <sub>H2'-<br/>H1'</sub> ) | ΣH1'<br>( <sup>3</sup> J <sub>H2'-<br/>H1'</sub> ) |
|------------------|------|------|------|------|------|-------|-------|------|------|--------------|--------------|-------|-------|------|------|--------------------------------------------|---------------------------------|-----------------------------------|--------------------------------------------|---------------------------------|----------------------------------------|----------------------------------------------------|----------------------------------------------------|
| C1               | 88.3 | 5.91 | 40.7 | 2.15 | 2.56 | 143.2 | 7.85  | 88.3 | 4.11 | 99.4         | 5.96         |       |       |      |      | 173.0                                      |                                 | 173.0                             | 14.3                                       |                                 | -8.3                                   | 14.0                                               | 16.6                                               |
| T2               | 85.9 | 5.71 | 39.0 | 2.24 | 2.52 | 139.7 | 7.55  | 86.4 | 4.19 | 14.5         | 1.73         |       |       |      |      | 164.7                                      |                                 | 164.7                             | 12.3                                       |                                 | 13.7                                   | 13.6                                               | 16.2                                               |
| A3               | 84.9 | 6.28 | 40.2 | 2.72 | 2.96 | 141.8 | 8.39  | 87.6 | 4.44 | 154.7        | 7.59         |       |       |      |      | 165.1                                      | 201.7                           | 165.1                             | 13.0                                       | 10.5                            | 13.7                                   | 14.4                                               | 16.8                                               |
| <sup>5m</sup> C4 | 85.9 | 5.50 | 39.7 | 1.97 | 2.29 | 138.9 | 7.07  | 85.2 | 4.14 | 14.9         | 1.57         |       |       | 8.43 | 6.17 | 164.7                                      |                                 | 164.7                             | 17.4                                       |                                 | 1.7                                    | 14.3                                               | -                                                  |
| G5               | 84.8 | 5.90 | 40.7 | 2.53 | 2.75 | 138.1 | 7.77  | 87.1 | 4.33 |              |              | 147.1 | 12.86 |      |      | 163.8                                      |                                 | 163.8                             | 17.3                                       |                                 | 14.2                                   | -                                                  | 16.5                                               |
| <sup>5m</sup> C6 | 86.2 | 5.61 | 39.8 | 2.03 | 2.34 | 138.9 | 7.08  | 85.6 | 4.14 | 15.0         | 1.50         |       |       | 8.55 | 5.96 | 167.4                                      |                                 | 167.4                             | 18.2                                       |                                 | 10.8                                   | 12.4                                               | -                                                  |
| G7               | 84.7 | 5.91 | 40.7 | 2.55 | 2.78 | 138.1 | 7.81  | 87.1 | 4.33 |              |              | 147.1 | 12.89 |      |      | 163.4                                      |                                 | 163.4                             | 15.1                                       |                                 | 14.4                                   | -                                                  | 16.2                                               |
| <sup>5m</sup> C8 | 86.2 | 5.62 | 39.8 | 2.05 | 2.36 | 138.9 | 7.09  | 85.6 | 4.14 | 15.1         | 1.54         |       |       | 8.56 | 5.95 | 166.2                                      |                                 | 166.2                             | 17.0                                       |                                 | 11.0                                   | 13.7                                               | -                                                  |
| G9               | 84.6 | 5.90 | 40.7 | 2.57 | 2.72 | 138.2 | 7.81  | 87.1 | 4.33 |              |              | 146.9 | 12.75 |      |      | 167.0                                      |                                 | 167.0                             | 15.1                                       |                                 | 9.3                                    | -                                                  | 17.3                                               |
| T10              | 85.3 | 5.61 | 39.2 | 1.99 | 2.30 | 138.6 | 7.23  | 85.6 | 4.14 | 14.4         | 1.48         | 158.5 | 13.61 |      |      | 165.9                                      |                                 | 165.9                             | 16.8                                       |                                 | 11.9                                   | 13.9                                               | 16.1                                               |
| A11              | 85.0 | 6.06 | 40.1 | 2.68 | 2.86 | 141.9 | 8.19  | 87.4 | 4.37 | 154.3        | 7.54         |       |       |      |      | 164.8                                      | 203.7                           | 164.8                             | 8.6                                        | 12.5                            | 13.8                                   | 13.7                                               | 14.7                                               |
| G12              | 84.2 | 6.01 | 42.4 | 2.26 | 2.43 | 138.5 | 7.71  | 87.4 | 4.17 |              |              |       |       |      |      | 164.0                                      |                                 | 164.0                             | 7.0                                        |                                 | 6.9                                    | 16.1                                               |                                                    |



**DNA<sup>H6</sup> d(CTACG<sup>5hm</sup>CGCGTAG)<sub>2</sub>**

| Nt                | C1'  | H1'  | C2'  | H2'  | H2'' | C6/C8 | H6/H8 | C4'  | H4'  | C2/C5<br>/C7 | H2/H5<br>/H7 | N1/N3 | H1/H3 | H41  | H42  | <sup>1</sup> J <sub>C6/C8-<br/>H6/H8</sub> | <sup>1</sup> J <sub>C2-H2</sub> | <sup>1</sup> J <sub>C1'-H1'</sub> | <sup>1</sup> D <sub>C6/C8<br/>-H6/H8</sub> | <sup>1</sup> D <sub>C2-H2</sub> | <sup>1</sup> D <sub>C1'-<br/>H1'</sub> | ΣH1'<br>( <sup>3</sup> J <sub>H2'-<br/>H1'</sub> ) | ΣH1'<br>( <sup>3</sup> J <sub>H2''-<br/>H1'</sub> ) |
|-------------------|------|------|------|------|------|-------|-------|------|------|--------------|--------------|-------|-------|------|------|--------------------------------------------|---------------------------------|-----------------------------------|--------------------------------------------|---------------------------------|----------------------------------------|----------------------------------------------------|-----------------------------------------------------|
| C1                | 88.3 | 5.91 | 40.7 | 2.15 | 2.56 | 143.2 | 7.85  | 88.3 | 4.11 | 99.4         | 5.97         |       |       |      |      | 181.7                                      |                                 | 173.3                             | 12.9                                       |                                 | -7.2                                   | 14.0                                               |                                                     |
| T2                | 85.9 | 5.68 | 39.0 | 2.23 | 2.52 | 139.7 | 7.55  | 86.4 | 4.19 | 14.5         | 1.73         | 159.2 | 13.71 |      |      | 177.9                                      |                                 | 167.0                             | 11.8                                       |                                 | 10.9                                   | 13.9                                               | 16.6                                                |
| A3                | 84.9 | 6.23 | 40.2 | 2.74 | 2.89 | 141.8 | 8.33  | 87.5 | 4.43 | 154.8        | 7.58         |       |       |      |      | 214.6                                      | 200.8                           | 165.9                             | 13.1                                       | 8.5                             | 12.6                                   | 13.7                                               | 16.5                                                |
| C4                | 86.1 | 5.54 | 39.8 | 1.96 | 2.31 | 142.1 | 7.25  | 85.2 | 4.16 | 98.3         | 5.27         |       |       | 8.14 | 6.52 | 178.0                                      |                                 | 166.7                             | 18.3                                       |                                 | 2.1                                    | 13.8                                               | 16.9                                                |
| G5                | 84.6 | 5.92 | 40.5 | 2.48 | 2.74 | 138.0 | 7.78  | 87.3 | 4.34 |              |              | 147.0 | 12.87 |      |      | 211.9                                      |                                 | 163.2                             | 16.3                                       |                                 | 14.6                                   | 13.8                                               | -                                                   |
| <sup>5hm</sup> C6 | 86.2 | 5.51 | 39.9 | 1.95 | 2.32 | 140.5 | 7.23  | 85.2 | 4.16 | 60.1         | 3.94         |       |       | 8.68 | 6.23 | 177.9                                      |                                 | 165.7                             | 17.9                                       |                                 | 9.2                                    | 13.0                                               | 16.5                                                |
| G7                | 84.5 | 5.87 | 40.5 | 2.63 | 2.72 | 138.4 | 7.89  | 87.3 | 4.35 |              |              | 146.8 | 12.86 |      |      | 212.8                                      |                                 | 163.0                             | 15.6                                       |                                 | 12.6                                   | 13.8                                               | 15.7                                                |
| C8                | 86.3 | 5.70 | 40.0 | 2.01 | 2.39 | 142.2 | 7.26  | 85.5 | 4.17 | 98.5         | 5.27         |       |       | 8.23 | 6.34 | 177.8                                      |                                 | 167.3                             | 16.9                                       |                                 | 10.5                                   | 13.1                                               | 16.2                                                |
| G9                | 84.6 | 5.91 | 40.5 | 2.59 | 2.74 | 138.4 | 7.87  | 87.2 | 4.33 |              |              | 146.9 | 12.91 |      |      | 212.8                                      |                                 | 164.3                             | 16.7                                       |                                 | 12.9                                   | -                                                  | -                                                   |
| T10               | 85.2 | 5.57 | 39.1 | 1.94 | 2.26 | 138.5 | 7.20  | 85.5 | 4.12 | 14.5         | 1.53         | 158.5 | 13.63 |      |      | 177.9                                      |                                 | 166.4                             | 11.2                                       |                                 | 10.2                                   | 13.5                                               | 16.8                                                |
| A11               | 85.0 | 6.06 | 40.1 | 2.68 | 2.86 | 141.9 | 8.18  | 87.5 | 4.39 | 154.3        | 7.55         |       |       |      |      | 213.7                                      | 201.7                           | 166.0                             | 9.0                                        | 13.2                            | 12.6                                   | 13.3                                               | 16.8                                                |
| G12               | 84.2 | 6.01 | 42.4 | 2.27 | 2.43 | 138.5 | 7.71  | 87.4 | 4.17 |              |              |       |       |      |      | 211.2                                      |                                 | 164.1                             | 7.2                                        |                                 | 5.7                                    | 16.3                                               | 14.0                                                |

| DNA <sup>H8</sup> d(CTACGCG <sup>5hm</sup> CGTAG) <sub>2</sub> |      |      |      |      |      |       |       |      |      |              |              |       |       |      |      |                                            |                                 |                                   |                                            |                                 |                                        |                                                     |                                                      |
|----------------------------------------------------------------|------|------|------|------|------|-------|-------|------|------|--------------|--------------|-------|-------|------|------|--------------------------------------------|---------------------------------|-----------------------------------|--------------------------------------------|---------------------------------|----------------------------------------|-----------------------------------------------------|------------------------------------------------------|
| Nt                                                             | C1'  | H1'  | C2'  | H2'  | H2'' | C6/C8 | H6/H8 | C4'  | H4'  | C2/C5<br>/C7 | H2/H5<br>/H7 | N1/N3 | H1/H3 | H41  | H42  | <sup>1</sup> J <sub>C6/C8-<br/>H6/H8</sub> | <sup>1</sup> J <sub>C2-H2</sub> | <sup>1</sup> J <sub>C1'-H1'</sub> | <sup>1</sup> D <sub>C6/C8-<br/>H6/H8</sub> | <sup>1</sup> D <sub>C2-H2</sub> | <sup>1</sup> D <sub>C1'-<br/>H1'</sub> | $\Sigma$ H1' <sup>(3)</sup><br>J <sub>H2'-H1'</sub> | $\Sigma$ H1' <sup>(3)</sup><br>J <sub>H2''-H1'</sub> |
| C1                                                             | 88.3 | 5.91 | 40.7 | 2.14 | 2.56 | 143.2 | 7.85  | 88.2 | 4.11 | 99.4         | 5.96         |       |       |      |      | 181.9                                      |                                 | 172.9                             | 13.4                                       |                                 | -5.9                                   | 13.3                                                |                                                      |
| T2                                                             | 85.9 | 5.69 | 39.0 | 2.23 | 2.52 | 139.7 | 7.54  | 86.4 | 4.19 | 14.5         | 1.73         | 159.2 | 13.70 |      |      | 177.6                                      |                                 | 167.0                             | 13.9                                       |                                 | 8.5                                    | 13.3                                                | 16.5                                                 |
| A3                                                             | 84.9 | 6.23 | 40.2 | 2.74 | 2.90 | 141.8 | 8.33  | 87.5 | 4.43 | 154.8        | 7.59         |       |       |      |      | 214.5                                      | 200.5                           | 165.5                             | 12.8                                       | 10.5                            | 14.6                                   | 14.0                                                | 16.1                                                 |
| C4                                                             | 86.1 | 5.57 | 39.7 | 1.91 | 2.34 | 142.0 | 7.22  | 85.2 | 4.16 | 98.5         | 5.25         |       |       | 8.19 | 6.53 | 178.2                                      |                                 | 167.4                             | 16.8                                       |                                 | 2.7                                    | 14.9                                                | 15.6                                                 |
| G5                                                             | 84.4 | 5.81 | 40.6 | 2.59 | 2.66 | 138.2 | 7.83  | 87.3 | 4.33 |              |              | 146.7 | 12.76 |      |      | 212.2                                      |                                 | 162.8                             | 16.1                                       |                                 | 17.0                                   | 14.7                                                | 15.5                                                 |
| C6                                                             | 86.3 | 5.68 | 40.0 | 2.00 | 2.37 | 142.3 | 7.26  | 85.6 | 4.16 | 98.4         | 5.27         |       |       | 8.21 | 6.32 | 177.6                                      |                                 | 166.8                             | 23.7                                       |                                 | 12.2                                   | 13.9                                                | 15.9                                                 |
| G7                                                             | 84.5 | 5.93 | 40.4 | 2.50 | 2.76 | 138.0 | 7.80  | 87.3 | 4.33 |              |              | 147.0 | 12.91 |      |      | 212.2                                      |                                 | 163.9                             | 14.9                                       |                                 | 13.0                                   | 13.2                                                | 15.4                                                 |
| <sup>5hm</sup> C8                                              | 86.2 | 5.49 | 39.9 | 2.02 | 2.32 | 140.5 | 7.26  | 85.0 | 4.11 | 60.1         | 4.00         |       |       | 8.64 | 6.25 | 177.5                                      |                                 | 166.2                             | 19.4                                       |                                 | 10.1                                   | 14.1                                                | 15.9                                                 |
| G9                                                             | 84.8 | 5.94 | 40.6 | 2.58 | 2.75 | 138.5 | 7.87  | 87.3 | 4.36 |              |              | 146.9 | 12.79 |      |      | 212.2                                      |                                 | 164.8                             | 18.2                                       |                                 | 13.2                                   | 13.8                                                | 15.4                                                 |
| T10                                                            | 85.1 | 5.58 | 39.1 | 1.95 | 2.26 | 138.5 | 7.20  | 85.5 | 4.11 | 14.5         | 1.52         | 158.5 | 13.64 |      |      | 177.5                                      |                                 | 165.9                             | 12.8                                       |                                 | 11.5                                   | 14.2                                                | 16.2                                                 |
| A11                                                            | 85.0 | 6.06 | 40.1 | 2.68 | 2.86 | 141.9 | 8.19  | 87.4 | 4.39 | 154.3        | 7.54         |       |       |      |      | 213.1                                      | 202.6                           | 165.7                             | 10.6                                       | 11.8                            | 12.2                                   | 13.7                                                | 16.1                                                 |
| G12                                                            | 84.2 | 6.01 | 42.4 | 2.26 | 2.43 | 138.5 | 7.71  | 87.4 | 4.17 |              |              |       |       |      |      | 211.5                                      |                                 | 163.8                             | 8.1                                        |                                 | 6.3                                    | 15.4                                                | 14.7                                                 |

**DNA<sup>H3</sup> d(CTA<sup>5hm</sup>CG<sup>5hm</sup>CG<sup>5hm</sup>CGTAG)<sub>2</sub>**

| Nt                | C1'  | H1'  | C2'  | H2'  | H2'' | C6/C8 | H6/H8 | C4'  | H4'  | C2/C5<br>/C7 | H2/H5<br>/H7 | N1/N3 | H1/H3 | H41  | H42  | <sup>1</sup> J <sub>C6/C8-<br/>H6/H8</sub> | <sup>1</sup> J <sub>C2-H2</sub> | <sup>1</sup> J <sub>C1'-H1'</sub> | <sup>1</sup> D <sub>C6/C8-<br/>H6/H8</sub> | <sup>1</sup> D <sub>C2-H2</sub> | <sup>1</sup> D <sub>C1'-<br/>H1'</sub> | ΣH1'<br>( <sup>3</sup> J <sub>H2'-<br/>H1'</sub> ) | ΣH1'<br>( <sup>3</sup> J <sub>H2'-<br/>H1'</sub> ) |
|-------------------|------|------|------|------|------|-------|-------|------|------|--------------|--------------|-------|-------|------|------|--------------------------------------------|---------------------------------|-----------------------------------|--------------------------------------------|---------------------------------|----------------------------------------|----------------------------------------------------|----------------------------------------------------|
| C1                | 88.3 | 5.90 | 40.7 | 2.14 | 2.56 | 143.2 | 7.85  | 88.2 | 4.11 | 99.4         | 5.96         |       |       |      |      | 181.7                                      |                                 | 172.6                             | 11.7                                       |                                 | -5.9                                   | 13.8                                               |                                                    |
| T2                | 85.9 | 5.69 | 39.0 | 2.24 | 2.51 | 139.7 | 7.54  | 86.4 | 4.19 | 14.5         | 1.72         |       |       |      |      | 178.5                                      |                                 | 167.1                             | 10.2                                       |                                 | 9.6                                    | 13.4                                               | 16.8                                               |
| A3                | 84.9 | 6.27 | 40.3 | 2.67 | 2.93 | 141.7 | 8.34  | 87.6 | 4.43 | 154.8        | 7.58         |       |       |      |      | 212.8                                      | 201.5                           | 165.4                             | 13.2                                       | 9.0                             | 12.6                                   | 13.6                                               | 17.0                                               |
| <sup>5hm</sup> C4 | 86.1 | 5.48 | 39.8 | 1.98 | 2.32 | 140.5 | 7.25  | 85.2 | 4.15 | 60.0         | 3.96         |       |       | 8.5  | 6.38 | 177.9                                      |                                 | 166.1                             | 17.0                                       |                                 | 4.8                                    | 13.7                                               | 16.2                                               |
| G5                | 84.7 | 5.90 | 40.8 | 2.48 | 2.74 | 138.3 | 7.80  | 87.3 | 4.34 |              |              | 146.8 | 12.79 |      |      | 211.8                                      |                                 | 162.1                             | 13.8                                       |                                 | 14.8                                   | 13.6                                               | -                                                  |
| <sup>5hm</sup> C6 | 86.2 | 5.55 | 39.9 | 2.03 | 2.35 | 140.5 | 7.26  | 85.2 | 4.14 | 60.0         | 3.84         |       |       | 8.61 | 6.2  | 178.0                                      |                                 | 167.5                             | 16.8                                       |                                 | 10.2                                   | 13.6                                               | -                                                  |
| G7                | 84.7 | 5.93 | 40.8 | 2.51 | 2.77 | 138.3 | 7.84  | 87.3 | 4.34 |              |              | 146.8 | 12.84 |      |      | 211.5                                      |                                 | 163.7                             | 20.1                                       |                                 | 11.5                                   | -                                                  | -                                                  |
| <sup>5hm</sup> C8 | 86.3 | 5.56 | 39.9 | 2.07 | 2.37 | 140.5 | 7.28  | 85.2 | 4.14 | 60.0         | 3.93         |       |       | 8.61 | 6.22 | 177.6                                      |                                 | 165.9                             | 16.8                                       |                                 | 8.7                                    | 14.0                                               | 16.6                                               |
| G9                | 84.8 | 5.93 | 40.8 | 2.57 | 2.74 | 138.5 | 7.87  | 87.3 | 4.34 |              |              | 146.6 | 12.68 |      |      | 212.4                                      |                                 | 164.9                             | 13.6                                       |                                 | 11.1                                   | 14.6                                               | -                                                  |
| T10               | 85.2 | 5.59 | 39.1 | 1.98 | 2.28 | 138.6 | 7.22  | 85.6 | 4.13 | 14.4         | 1.48         | 158.4 | 13.61 |      |      | 177.8                                      |                                 | 166.6                             | 10.5                                       |                                 | 8.3                                    | 14.4                                               | 17.7                                               |
| A11               | 85.0 | 6.06 | 40.1 | 2.68 | 2.87 | 141.9 | 8.19  | 87.5 | 4.39 | 154.3        | 7.50         |       |       |      |      | 213.3                                      | 201.2                           | 166.2                             | 8.2                                        | 10.7                            | 8.5                                    | 13.7                                               | 16.4                                               |
| G12               | 84.2 | 6.00 | 42.4 | 2.26 | 2.43 | 138.5 | 7.71  | 87.4 | 4.17 |              |              |       |       |      |      | 212.2                                      |                                 | 163.6                             | 5.3                                        |                                 | 7.0                                    | 16.5                                               | 13.4                                               |

**DNA<sup>F6</sup> d(CTACG<sup>5f</sup>CGCGTAG)<sub>2</sub>**

| Nt               | C1'  | H1'  | C2'  | H2'  | H2'' | C6/C8 | H6/H8 | C4'  | H4'  | C2/C5<br>/C7 | H2/H5<br>/H7 | N1/N3 | H1/H3 | H41  | H42  | <sup>1</sup> J <sub>C6/C8-<br/>H6/H8</sub> | <sup>1</sup> J <sub>C2-H2</sub> | <sup>1</sup> J <sub>C1'-H1'</sub> | <sup>1</sup> D <sub>C6/C8-<br/>H6/H8</sub> | <sup>1</sup> D <sub>C2-H2</sub> | <sup>1</sup> D <sub>C1'-<br/>H1'</sub> | ΣH1'<br>( <sup>3</sup> J <sub>H2'-<br/>H1'</sub> ) | ΣH1'<br>( <sup>3</sup> J <sub>H2'-<br/>H1'</sub> ) |
|------------------|------|------|------|------|------|-------|-------|------|------|--------------|--------------|-------|-------|------|------|--------------------------------------------|---------------------------------|-----------------------------------|--------------------------------------------|---------------------------------|----------------------------------------|----------------------------------------------------|----------------------------------------------------|
| C1               | 88.3 | 5.91 | 40.6 | 2.13 | 2.56 | 143.2 | 7.84  | 88.2 | 4.11 | 99.4         | 5.96         |       |       |      |      | 181.4                                      |                                 | 172.3                             | 12.8                                       |                                 | -6.6                                   | 13.3                                               | 14.0                                               |
| T2               | 85.9 | 5.66 | 39.0 | 2.23 | 2.51 | 139.7 | 7.54  | 86.4 | 4.18 | 14.5         | 1.72         | 159.2 | 13.70 |      |      | 177.7                                      |                                 | 163.9                             | 14.5                                       |                                 | 11.7                                   | 12.6                                               | 14.0                                               |
| A3               | 84.9 | 6.22 | 40.2 | 2.73 | 2.88 | 141.8 | 8.32  | 87.5 | 4.43 | 154.7        | 7.58         |       |       |      |      | 213.8                                      | 200.9                           | 165.2                             | 12.9                                       | 8.7                             | 14.6                                   | 14.3                                               | 14.3                                               |
| C4               | 86.0 | 5.54 | 39.7 | 1.93 | 2.29 | 142.1 | 7.22  | 85.3 | 4.16 | 98.4         | 5.24         |       |       | 8.14 | 6.49 | 180.1                                      |                                 | 166.9                             | 21.1                                       |                                 | 2.9                                    | 13.9                                               | 13.0                                               |
| G5               | 84.4 | 5.93 | 40.6 | 2.56 | 2.78 | 137.9 | 7.73  | 87.3 | 4.34 |              |              | 147.1 | 12.92 |      |      | 210.6                                      |                                 | 164.3                             | 14.2                                       |                                 | 15.2                                   | -                                                  | 14.3                                               |
| <sup>5f</sup> C6 | 87.0 | 5.62 | 40.5 | 2.01 | 2.42 | 155.3 | 8.12  | 85.5 | 4.16 | 191.8        | 9.25         |       |       | 9.1  | 7.86 | 177.8                                      |                                 | 172.1                             | 19.4                                       |                                 | 2.5                                    | 14.4                                               | 13.3                                               |
| G7               | 84.5 | 5.89 | 40.7 | 2.61 | 2.73 | 138.6 | 7.90  | 87.3 | 4.36 |              |              | 146.3 | 12.55 |      |      | 212.0                                      |                                 | 163.0                             | 19.3                                       |                                 | 11.2                                   | 14.3                                               | 14.5                                               |
| C8               | 86.4 | 5.70 | 40.2 | 1.99 | 2.37 | 142.2 | 7.25  | 85.3 | 4.16 | 98.4         | 5.23         |       |       | 8.2  | 6.35 | 178.8                                      |                                 | 168.2                             | 20.2                                       |                                 | 10.2                                   | 13.4                                               | 13.6                                               |
| G9               | 84.6 | 5.92 | 40.4 | 2.60 | 2.74 | 138.4 | 7.87  | 87.3 | 4.34 |              |              | 146.9 | 12.74 |      |      | 211.7                                      |                                 | 164.8                             | 18.8                                       |                                 | 12.4                                   | 13.4                                               | 14.5                                               |
| T10              | 85.1 | 5.56 | 39.0 | 1.94 | 2.25 | 138.5 | 7.19  | 85.5 | 4.11 | 14.5         | 1.53         | 158.5 | 13.63 |      |      | 178.2                                      |                                 | 166.1                             | 9.5                                        |                                 | 10.7                                   | 13.2                                               | 14.0                                               |
| A11              | 85.0 | 6.05 | 40.1 | 2.68 | 2.86 | 141.9 | 8.18  | 87.5 | 4.38 | 154.3        | 7.55         |       |       |      |      | 213.6                                      | 201.3                           | 166.7                             | 8.1                                        | 12.3                            | 11.8                                   | 14.0                                               | 14.7                                               |
| G12              | 84.2 | 6.01 | 42.4 | 2.26 | 2.44 | 138.5 | 7.71  | 87.4 | 4.17 |              |              |       |       |      |      | 211.6                                      |                                 | 162.8                             | 6.2                                        |                                 | 7.9                                    | 15.4                                               | 16.1                                               |

| DNA <sup>F8</sup> d(CTACGCG <sup>5f</sup> CGTAG) <sub>2</sub> |      |      |      |      |      |       |       |      |      |              |              |       |       |      |      |                                            |                                 |                                   |                                            |                                 |                                        |                                                    |                                                    |
|---------------------------------------------------------------|------|------|------|------|------|-------|-------|------|------|--------------|--------------|-------|-------|------|------|--------------------------------------------|---------------------------------|-----------------------------------|--------------------------------------------|---------------------------------|----------------------------------------|----------------------------------------------------|----------------------------------------------------|
| Nt                                                            | C1'  | H1'  | C2'  | H2'  | H2'' | C6/C8 | H6/H8 | C4'  | H4'  | C2/C5<br>/C7 | H2/H5<br>/H7 | N1/N3 | H1/H3 | H41  | H42  | <sup>1</sup> J <sub>C6/C8-<br/>H6/H8</sub> | <sup>1</sup> J <sub>C2-H2</sub> | <sup>1</sup> J <sub>C1'-H1'</sub> | <sup>1</sup> D <sub>C6/C8<br/>-H6/H8</sub> | <sup>1</sup> D <sub>C2-H2</sub> | <sup>1</sup> D <sub>C1'-<br/>H1'</sub> | ΣH1'<br>( <sup>3</sup> J <sub>H2'-<br/>H1'</sub> ) | ΣH1'<br>( <sup>3</sup> J <sub>H2'-<br/>H1'</sub> ) |
| C1                                                            | 88.3 | 5.91 | 40.7 | 2.14 | 2.56 | 143.2 | 7.84  | 88.2 | 4.11 |              |              |       |       |      |      | 181.9                                      |                                 | 171.7                             | 13.8                                       |                                 | -5.2                                   | 13.3                                               | 12.6                                               |
| T2                                                            | 85.9 | 5.69 | 39.0 | 2.24 | 2.51 | 139.7 | 7.53  | 86.4 | 4.19 | 14.5         | 1.72         | 159.3 | 13.69 |      |      | 177.8                                      |                                 | 165.7                             | 11.5                                       |                                 | 11.9                                   | 16.4                                               | 16.5                                               |
| A3                                                            | 84.9 | 6.24 | 40.2 | 2.75 | 2.90 | 141.8 | 8.33  | 87.5 | 4.43 | 154.8        | 7.60         |       |       |      |      | 214.2                                      | 200.2                           | 167.2                             | 12.3                                       | 12.6                            | 12.7                                   | 16.1                                               | 16.5                                               |
| C4                                                            | 86.1 | 5.51 | 39.7 | 1.94 | 2.34 | 142.1 | 7.25  | 85.3 | 4.16 | 98.4         | 5.29         |       |       | 8.18 | 6.57 | 179.0                                      |                                 | 165.9                             | 18.1                                       |                                 | 4.4                                    | 16.1                                               | 16.1                                               |
| G5                                                            | 84.5 | 5.85 | 40.6 | 2.58 | 2.70 | 138.4 | 7.85  | 87.3 | 4.34 |              |              | 146.2 | 12.50 |      |      | 212.7                                      |                                 | 163.4                             | 15.7                                       |                                 | 12.8                                   | 16.8                                               | 16.5                                               |
| C6                                                            | 86.2 | 5.66 | 40.0 | 1.92 | 2.32 | 142.2 | 7.21  | 85.5 | 4.13 | 98.4         | 5.21         |       |       | 8.2  | 6.35 | 178.0                                      |                                 | 168.2                             | 18.4                                       |                                 | 9.5                                    | 14.5                                               | 15.9                                               |
| G7                                                            | 84.2 | 5.94 | 40.3 | 2.59 | 2.80 | 137.9 | 7.77  | 87.3 | 4.34 |              |              | 147.2 | 12.97 |      |      | 211.7                                      |                                 | 163.1                             | 14.3                                       |                                 | 12.0                                   | 16.0                                               | 16.7                                               |
| <sup>5f</sup> C8                                              | 87.1 | 5.61 | 40.4 | 2.05 | 2.41 | 155.3 | 8.12  | 85.4 | 4.18 | 191.9        | 9.27         |       |       | 9.1  | 7.81 | 178.2                                      |                                 | 171.1                             | 16.6                                       |                                 | 6.1                                    | 15.5                                               | 15.1                                               |
| G9                                                            | 84.7 | 5.93 | 40.6 | 2.59 | 2.73 | 138.6 | 7.88  | 87.3 | 4.34 |              |              | 147.0 | 12.78 |      |      | 213.9                                      |                                 | 164.3                             | 13.6                                       |                                 | 9.3                                    | 16.1                                               | 16.1                                               |
| T10                                                           | 85.2 | 5.57 | 39.0 | 1.96 | 2.25 | 138.6 | 7.21  | 85.5 | 4.12 | 14.4         | 1.51         | 158.5 | 13.66 |      |      | 178.0                                      |                                 | 166.8                             | 11.5                                       |                                 | 7.8                                    | 16.5                                               | 16.1                                               |
| A11                                                           | 85.0 | 6.06 | 40.0 | 2.69 | 2.86 | 141.9 | 8.18  | 87.5 | 4.39 | 154.3        | 7.54         |       |       |      |      | 214.1                                      | 203.0                           | 166.1                             | 8.2                                        | 9.1                             | 9.7                                    | 15.8                                               | 15.7                                               |
| G12                                                           | 84.2 | 6.01 | 42.4 | 2.27 | 2.44 | 138.5 | 7.71  | 87.4 | 4.17 |              |              |       |       |      |      | 213.0                                      |                                 | 165.1                             | 5.8                                        |                                 | 5.1                                    | 15.4                                               | 14.7                                               |

| DNA <sup>F3</sup> d(CTA <sup>5f</sup> CG <sup>5f</sup> CG <sup>5f</sup> CGTAG) <sub>2</sub> |      |      |      |      |      |       |       |      |      |              |              |       |       |      |      |                                            |                                 |                                   |                                            |                                 |                                        |                                                    |                                                     |
|---------------------------------------------------------------------------------------------|------|------|------|------|------|-------|-------|------|------|--------------|--------------|-------|-------|------|------|--------------------------------------------|---------------------------------|-----------------------------------|--------------------------------------------|---------------------------------|----------------------------------------|----------------------------------------------------|-----------------------------------------------------|
| Nt                                                                                          | C1'  | H1'  | C2'  | H2'  | H2'' | C6/C8 | H6/H8 | C4'  | H4'  | C2/C5<br>/C7 | H2/H5<br>/H7 | N1/N3 | H1/H3 | H41  | H42  | <sup>1</sup> J <sub>C6/C8-<br/>H6/H8</sub> | <sup>1</sup> J <sub>C2-H2</sub> | <sup>1</sup> J <sub>C1'-H1'</sub> | <sup>1</sup> D <sub>C6/C8<br/>-H6/H8</sub> | <sup>1</sup> D <sub>C2-H2</sub> | <sup>1</sup> D <sub>C1'-<br/>H1'</sub> | ΣH1'<br>( <sup>3</sup> J <sub>H2'-<br/>H1'</sub> ) | ΣH1'<br>( <sup>3</sup> J <sub>H2''-<br/>H1'</sub> ) |
| C1                                                                                          | 88.3 | 5.90 | 40.6 | 2.12 | 2.54 | 143.2 | 7.83  | 88.3 | 4.10 | 99.4         | 5.96         |       |       |      |      | 182.4                                      |                                 | 171.9                             | 12.65<br>5                                 | -5.3                            | 13.6                                   | 12.8                                               |                                                     |
| T2                                                                                          | 85.8 | 5.65 | 38.9 | 2.22 | 2.46 | 139.7 | 7.51  | 86.4 | 4.18 | 14.5         | 1.70         | 159.1 | 13.66 |      |      | 177.6                                      |                                 | 164.5                             | 11.72<br>5                                 | 15.6                            | 13.3                                   | 17.1                                               |                                                     |
| A3                                                                                          | 84.7 | 6.28 | 40.3 | 2.77 | 2.98 | 141.7 | 8.31  | 87.6 | 4.45 | 155.0        | 7.58         |       |       |      |      | 214.6                                      | 200.1                           | 167.2                             | 13.28                                      | 9.2                             | 13.3                                   | 13.7                                               | 16.5                                                |
| <sup>5f</sup> C4                                                                            | 86.8 | 5.57 | 40.3 | 2.01 | 2.39 | 155.4 | 8.14  | 85.5 | 4.22 | 191.7        | 9.23         |       |       | 8.97 | 7.91 | 178.0                                      |                                 | 171.0                             | 19.18<br>5                                 | -4.8                            | 13.8                                   | 16.1                                               |                                                     |
| G5                                                                                          | 84.5 | 5.94 | 40.7 | 2.62 | 2.87 | 138.4 | 7.77  | 87.4 | 4.35 |              |              | 146.4 | 12.54 |      |      | 212.4                                      |                                 | 163.8                             | 20.52<br>5                                 | 18.6                            | 14.3                                   | 17.1                                               |                                                     |
| <sup>5f</sup> C6                                                                            | 87.0 | 5.64 | 40.5 | 2.02 | 2.40 | 155.4 | 8.11  | 85.5 | 4.18 | 191.6        | 9.18         |       |       | 9.0  | 7.79 | 176.8                                      |                                 | 168.1                             | 20.54                                      | 6.2                             | 13.8                                   | 15.0                                               |                                                     |
| G7                                                                                          | 84.5 | 5.95 | 40.7 | 2.66 | 2.81 | 138.4 | 7.81  | 87.4 | 4.35 |              |              | 146.4 | 12.56 |      |      | 212.7                                      |                                 | 162.0                             | 19.66                                      | 13.4                            | -                                      | 16.5                                               |                                                     |
| <sup>5f</sup> C8                                                                            | 87.2 | 5.68 | 40.5 | 2.10 | 2.45 | 155.4 | 8.14  | 85.5 | 4.21 | 191.9        | 9.24         |       |       | 9.0  | 7.85 | 178.0                                      |                                 | 171.0                             | 17.61<br>5                                 | 6.8                             | 13.5                                   | 15.5                                               |                                                     |
| G9                                                                                          | 84.7 | 5.95 | 40.8 | 2.65 | 2.77 | 138.9 | 7.91  | 87.4 | 4.35 |              |              | 146.1 | 12.38 |      |      | 213.0                                      |                                 | 165.5                             | 16.73                                      | 10.4                            | -                                      | 15.8                                               |                                                     |
| T10                                                                                         | 85.1 | 5.56 | 39.1 | 1.96 | 2.24 | 138.6 | 7.20  | 85.5 | 4.12 | 14.3         | 1.45         | 158.3 | 13.51 |      |      | 176.6                                      |                                 | 165.1                             | 15.73                                      | 11.6                            | 13.4                                   | 16.4                                               |                                                     |
| A11                                                                                         | 85.0 | 6.06 | 40.0 | 2.70 | 2.87 | 141.9 | 8.18  | 87.6 | 4.39 | 154.3        | 7.52         |       |       |      |      | 213.9                                      | 202.1                           | 166.9                             | 7.515                                      | 11.6                            | 11.8                                   | 14.7                                               | 15.8                                                |
| G12                                                                                         | 84.2 | 6.00 | 42.4 | 2.25 | 2.44 | 138.5 | 7.71  | 87.4 | 4.17 |              |              |       |       |      |      | 211.8                                      |                                 | 164.0                             | 6.455                                      | 5.2                             | 16.1                                   | 14.0                                               |                                                     |

**Table S2:** The chemical shift perturbations (CSP) that arise due to the epigenetic modifications is tabulated. The presence of the modifications in 8<sup>th</sup> position (from DNA<sup>N8</sup>) provides the effect due to H-bonding (observed from **G5**) and stacking on the 5'-/3'-neighbors (G7/G9, respectively). Thus, for the 6<sup>th</sup> position modification (in DNA<sup>N6</sup>), we see that the CSP observed for G7 is a sum of H-bonding (as it pairs with C6) and stacking in the 3'-end (due to modification in the 6<sup>th</sup> position). For instance, the CSP of G5-N1 in DNA<sup>F8</sup> is -0.8 ppm, with G7 experiencing +0.1 ppm and no change for G5. Thus, the CSP of G7-N1 in DNA<sup>F6</sup> is -0.8+0.1 = -0.7 ppm. The same trend of such arithmetic sums of CSPs can be observed for <sup>13</sup>C-C6/C8 and <sup>13</sup>C-C1' resonances as well for the various cytosine modifications.

| Modified-Control DNA $\Delta\delta$ (ppm) |                        |                   |                   |                   |                   |                   |                   |                   |                   |                   |
|-------------------------------------------|------------------------|-------------------|-------------------|-------------------|-------------------|-------------------|-------------------|-------------------|-------------------|-------------------|
| N3/N1                                     | DNA <sup>control</sup> | DNA <sup>M6</sup> | DNA <sup>M8</sup> | DNA <sup>M3</sup> | DNA <sup>H6</sup> | DNA <sup>H8</sup> | DNA <sup>H3</sup> | DNA <sup>F6</sup> | DNA <sup>F8</sup> | DNA <sup>F3</sup> |
| <b>T2-A11</b>                             | 159.3                  | 0.0               | 0.0               | -                 | 0.0               | 0.0               | -                 | 0.0               | 0.0               | -0.1              |
| <b>A3-T10</b>                             | 158.5                  | 0.0               | 0.0               | 0.0               | 0.0               | 0.0               | -0.1              | 0.0               | 0.0               | -0.2              |
| <b>C4-G9</b>                              | 147.0                  | 0.0               | 0.0               | 0.0               | 0.0               | 0.0               | -0.3              | -0.1              | 0.0               | -0.9              |
| <b>G5-C8</b>                              | 147.0                  | 0.0               | 0.1               | 0.1               | 0.1               | -0.3              | -0.2              | 0.1               | -0.8              | -0.6              |
| <b>C6-G7</b>                              | 147.0                  | 0.1               | 0.0               | 0.1               | -0.2              | 0.0               | -0.2              | -0.7              | 0.1               | -0.7              |

| Modified-Control DNA $\Delta\delta$ (ppm) |                        |                   |                   |                   |                   |                   |                   |                   |                   |                   |
|-------------------------------------------|------------------------|-------------------|-------------------|-------------------|-------------------|-------------------|-------------------|-------------------|-------------------|-------------------|
| C1'                                       | DNA <sup>control</sup> | DNA <sup>M6</sup> | DNA <sup>M8</sup> | DNA <sup>M3</sup> | DNA <sup>H6</sup> | DNA <sup>H8</sup> | DNA <sup>H3</sup> | DNA <sup>F6</sup> | DNA <sup>F8</sup> | DNA <sup>F3</sup> |
| <b>TSP</b>                                | 0.0                    | 0.0               | 0.0               | 0.0               | 0.0               | 0.0               | 0.0               | 0.0               | 0.0               | 0.0               |
| <b>C1</b>                                 | 88.3                   | 0.0               | 0.0               | 0.0               | 0.0               | 0.0               | 0.0               | 0.0               | 0.0               | 0.0               |
| <b>T2</b>                                 | 85.9                   | 0.0               | 0.0               | 0.0               | 0.0               | 0.0               | 0.0               | 0.0               | 0.0               | -0.1              |
| <b>A3</b>                                 | 84.9                   | 0.0               | 0.0               | 0.0               | 0.0               | 0.0               | 0.0               | 0.0               | 0.0               | -0.1              |
| <b>C4</b>                                 | 86.1                   | 0.0               | 0.0               | -0.2              | 0.0               | 0.0               | 0.0               | -0.1              | 0.0               | 0.7               |
| <b>G5</b>                                 | 84.5                   | 0.1               | 0.0               | 0.3               | 0.1               | -0.1              | 0.2               | -0.1              | 0.0               | 0.0               |
| <b>C6</b>                                 | 86.3                   | -0.2              | 0.0               | -0.1              | -0.1              | 0.0               | 0.0               | 0.8               | 0.0               | 0.7               |
| <b>G7</b>                                 | 84.4                   | 0.0               | 0.2               | 0.3               | 0.1               | 0.1               | 0.3               | 0.1               | -0.2              | 0.1               |
| <b>C8</b>                                 | 86.3                   | 0.1               | -0.2              | -0.1              | 0.0               | -0.1              | 0.0               | 0.1               | 0.9               | 0.9               |
| <b>G9</b>                                 | 84.6                   | 0.0               | 0.1               | 0.0               | 0.0               | 0.2               | 0.2               | 0.0               | 0.1               | 0.2               |
| <b>T10</b>                                | 85.2                   | 0.0               | 0.1               | 0.1               | 0.0               | 0.0               | 0.0               | 0.0               | 0.0               | 0.0               |
| <b>A11</b>                                | 85.0                   | 0.0               | 0.0               | 0.0               | 0.0               | 0.0               | 0.0               | 0.0               | 0.0               | 0.0               |
| <b>G12</b>                                | 84.2                   | 0.0               | 0.0               | 0.0               | 0.0               | 0.0               | 0.0               | 0.0               | 0.0               | 0.0               |

| Modified-Control DNA $\Delta\delta$ (ppm) |                              |                         |                         |                         |                         |                         |                         |                         |                         |                         |
|-------------------------------------------|------------------------------|-------------------------|-------------------------|-------------------------|-------------------------|-------------------------|-------------------------|-------------------------|-------------------------|-------------------------|
| <b>C6/C8</b>                              | <b>DNA<sup>control</sup></b> | <b>DNA<sup>M6</sup></b> | <b>DNA<sup>M8</sup></b> | <b>DNA<sup>M3</sup></b> | <b>DNA<sup>H6</sup></b> | <b>DNA<sup>H8</sup></b> | <b>DNA<sup>H3</sup></b> | <b>DNA<sup>F6</sup></b> | <b>DNA<sup>F8</sup></b> | <b>DNA<sup>F3</sup></b> |
| <b>C1</b>                                 | 143.2                        | 0.0                     | 0.0                     | 0.0                     | 0.0                     | 0.0                     | 0.0                     | 0.0                     | 0.0                     | 0.0                     |
| <b>T2</b>                                 | 139.7                        | 0.0                     | 0.0                     | 0.0                     | 0.0                     | 0.0                     | 0.0                     | 0.0                     | 0.0                     | 0.0                     |
| <b>A3</b>                                 | 141.8                        | 0.0                     | 0.0                     | 0.0                     | 0.0                     | 0.0                     | -0.1                    | 0.0                     | 0.0                     | -0.1                    |
| <b>C4</b>                                 | 142.1                        | 0.0                     | -0.1                    | -3.2                    | 0.0                     | -0.1                    | -1.6                    | 0.0                     | 0.0                     | 13.2                    |
| <b>G5</b>                                 | 138.1                        | 0.0                     | 0.0                     | 0.0                     | -0.1                    | 0.1                     | 0.1                     | -0.3                    | 0.3                     | 0.3                     |
| <b>C6</b>                                 | 142.2                        | -3.4                    | 0.0                     | -3.3                    | -1.7                    | 0.1                     | -1.6                    | 13.1                    | 0.0                     | 13.2                    |
| <b>G7</b>                                 | 138.1                        | 0.0                     | 0.0                     | 0.0                     | 0.2                     | -0.1                    | 0.1                     | 0.5                     | -0.2                    | 0.2                     |
| <b>C8</b>                                 | 142.2                        | 0.0                     | -3.3                    | -3.3                    | 0.0                     | -1.7                    | -1.6                    | 0.0                     | 13.1                    | 13.2                    |
| <b>G9</b>                                 | 138.4                        | 0.0                     | -0.1                    | -0.1                    | 0.0                     | 0.1                     | 0.2                     | 0.0                     | 0.2                     | 0.5                     |
| <b>T10</b>                                | 138.5                        | 0.0                     | 0.0                     | 0.1                     | 0.0                     | 0.0                     | 0.1                     | 0.0                     | 0.1                     | 0.1                     |
| <b>A11</b>                                | 141.9                        | 0.0                     | 0.0                     | 0.0                     | 0.0                     | 0.0                     | 0.0                     | 0.0                     | 0.0                     | 0.1                     |
| <b>G12</b>                                | 138.5                        | 0.0                     | 0.0                     | 0.0                     | 0.0                     | 0.0                     | 0.0                     | 0.0                     | 0.0                     | 0.0                     |



4.  $^{13}\text{C}/^{15}\text{N}$  chemical shift and  $^1\text{J}_{\text{C-H}}$  perturbations for all the nucleotides across samples ( $\text{DNA}^{\text{N\#}}$ ) compared to  $\text{DNA}^{\text{control}}$

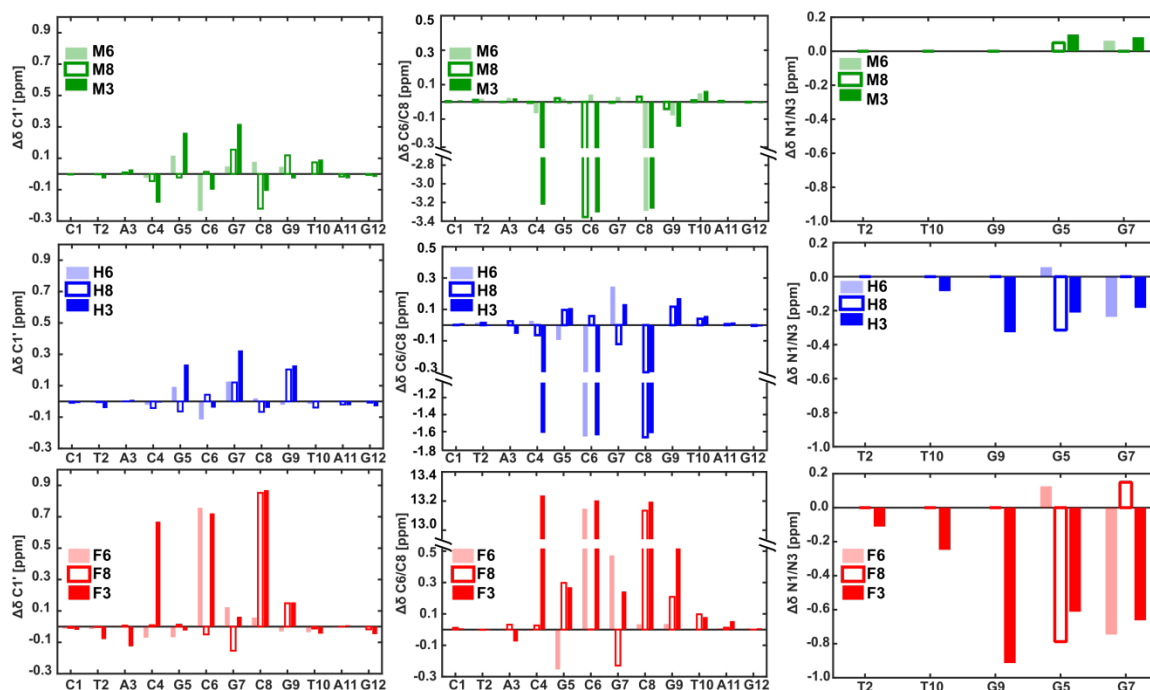

**Figure S3:** Chemical shift differences of  $\text{DNA}^{\text{N\#}}$  compared to  $\text{DNA}^{\text{control}}$ . Left panel: changes to sugar  $^{13}\text{C}\text{-C1'}$  chemical shifts magnitudes ( $\Delta\delta \text{C1'}$ , in ppm). Middle panel: changes to aromatic  $^{13}\text{C}\text{-C6/C8}$  chemical shifts magnitudes ( $\Delta\delta \text{C6/C8}$ , in ppm); Right panel: changes to imino  $^{15}\text{N}\text{-N1/N3}$  chemical shifts magnitudes ( $\Delta\delta \text{N1/N3}$ , in ppm) for all nucleotide positions from 1-12 upon cytosine modification across  $\text{DNA}^{\text{N\#}}$  samples. With  $\text{DNA}^{\text{M6/M8/M3}}$  (in green),  $\text{DNA}^{\text{H6/H8/H3}}$  (in blue), and  $\text{DNA}^{\text{F6/F8/F3}}$  (in red) showing significant changes relative to  $\text{DNA}^{\text{control}}$ .

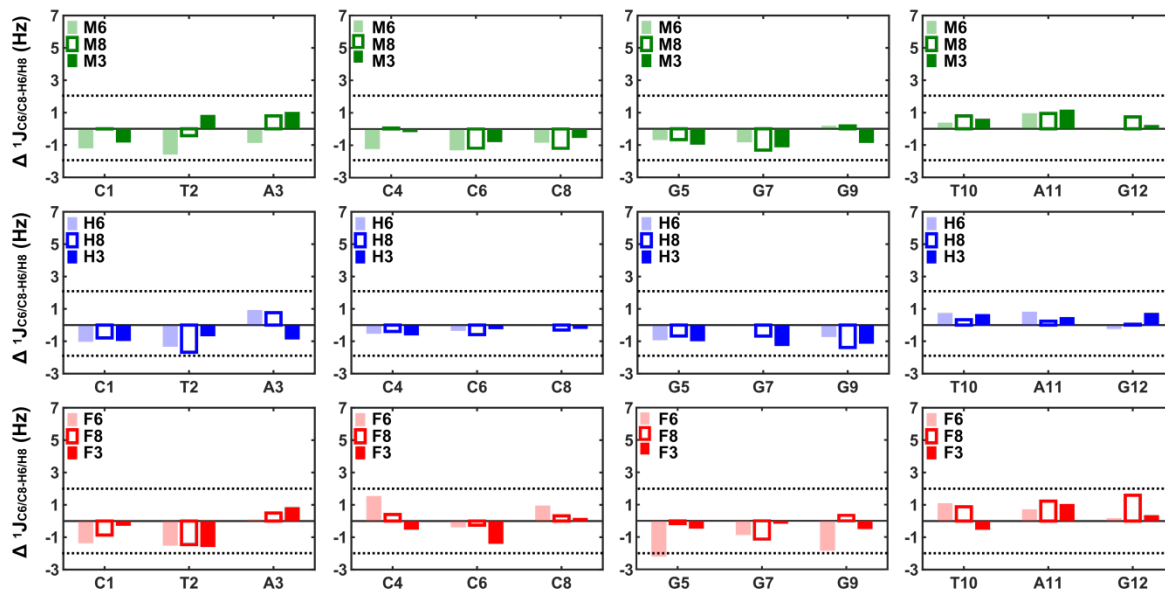

**Figure S4:** Changes to one-bond  $^{13}\text{C}$ - $^1\text{H}$  C6/C8-H6/H8 heteronuclear scalar coupling magnitudes ( $\Delta^1J_{\text{C6/C8-H6/H8}}$ , in Hz) for all nucleotide positions 1-12 upon cytosine modification across DNA<sup>N#</sup> samples. Measurement uncertainty (2 Hz) is marked with dotted lines, with DNA<sup>M6/M8/M3</sup> (in green, upper panel), DNA<sup>H6/H8/H3</sup> (in blue, middle panel), and DNA<sup>F6/F8/F3</sup> (in red, lower panel) showing significant changes relative to DNA<sup>control</sup>.

## 5. Statistics of structure refinement constraints

|                                 | DNA <sup>control</sup> | DNA <sup>M6</sup> | DNA <sup>M8</sup> | DNA <sup>M3</sup> | DNA <sup>H6</sup> | DNA <sup>H8</sup> | DNA <sup>H3</sup> | DNA <sup>F6</sup> | DNA <sup>F8</sup> | DNA <sup>F3</sup> |
|---------------------------------|------------------------|-------------------|-------------------|-------------------|-------------------|-------------------|-------------------|-------------------|-------------------|-------------------|
| Dihedral restraints             | 116                    | 116               | 116               | 116               | 116               | 116               | 116               | 116               | 116               | 116               |
| H-bond restraints               | 72                     | 72                | 72                | 72                | 72                | 72                | 72                | 72                | 72                | 72                |
| Base-pair planarity restraints  | 26                     | 26                | 26                | 26                | 26                | 26                | 26                | 26                | 26                | 26                |
| NOE restraints                  | 324                    | 276               | 288               | 262               | 286               | 289               | 292               | 282               | 282               | 288               |
| RDC restraints                  | 44                     | 44                | 44                | 44                | 44                | 44                | 44                | 44                | 44                | 44                |
| D <sub>a</sub> , R              | -20.0,<br>0.26         | -20.0,<br>0.26    | -20.0,<br>0.26    | -20.0,<br>0.26    | -20.0,<br>0.26    | -20.0,<br>0.26    | -20.0,<br>0.26    | -20.0,<br>0.26    | -20.0,<br>0.26    | -20.0,<br>0.26    |
| Dihedral angle violations (>6°) | 0                      | 0                 | 0                 | 0                 | 0                 | 0                 | 0                 | 0                 | 0                 | 0                 |
| NOE violations (>0.5 Å)         | 0                      | 0                 | 0                 | 0                 | 0                 | 0                 | 0                 | 0                 | 0                 | 0                 |
| RDC RMSD (Hz)                   | 1.81 ±<br>0.07         | 1.55 ±<br>0.08    | 1.09 ±<br>0.01    | 1.21 ±<br>0.01    | 1.46 ±<br>0.00    | 1.54 ±<br>0.03    | 1.22 ±<br>0.11    | 1.75 ±<br>0.03    | 1.33 ±<br>0.13    | 1.75 ±<br>0.01    |

**Table S3:** Statistics on the structure refinement of DNA<sup>control</sup>, and DNA<sup>N#</sup> systems.

6. Cartoon model comparison of DNA<sup>control</sup> and DNA<sup>N#</sup>

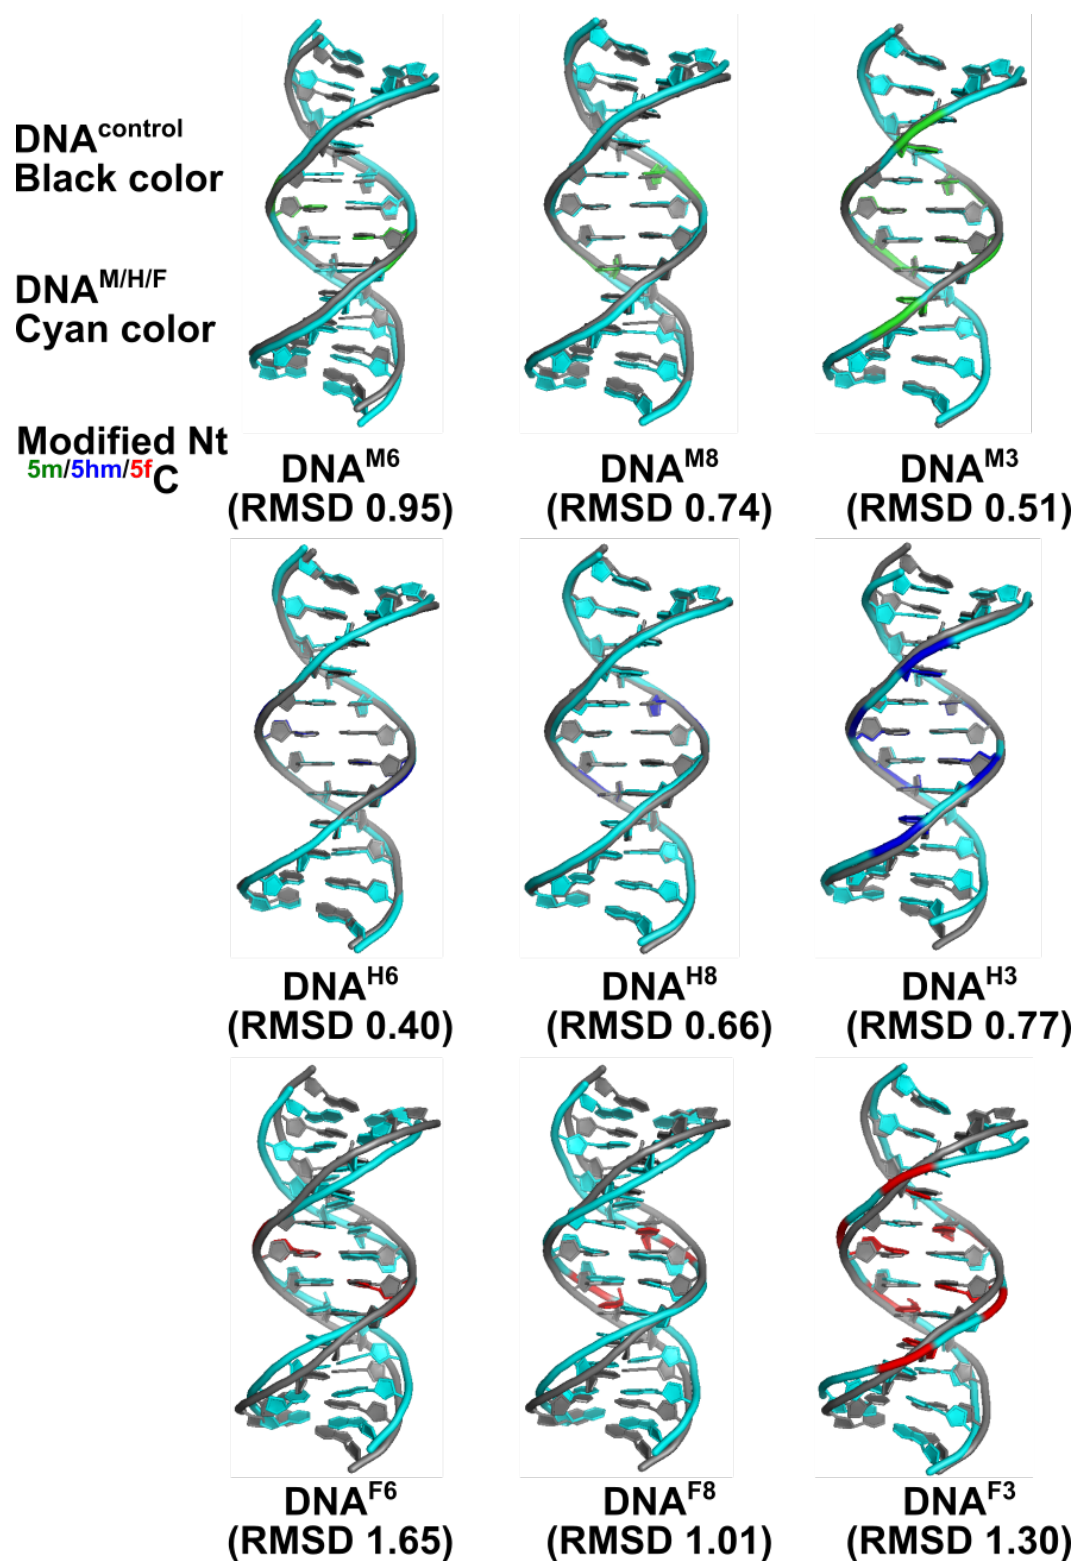

**Figure S5:** Aligned structures of DNA<sup>N#</sup> with respect to DNA<sup>control</sup>, only heavy atoms of nucleotides 3-10 and 15-22 were aligned using pymol, root mean square deviation (RMSD) calculated for aligned structures for all heavy atoms of 3-10, 15-22 were provided for each overlaid structures. DNA<sup>control</sup> is shown in grey and DNA<sup>N#</sup> shown as cyan, with modification sites being represented in specific colors, <sup>5m</sup>C (green), <sup>5hm</sup>C (blue), and <sup>5f</sup>C (red)

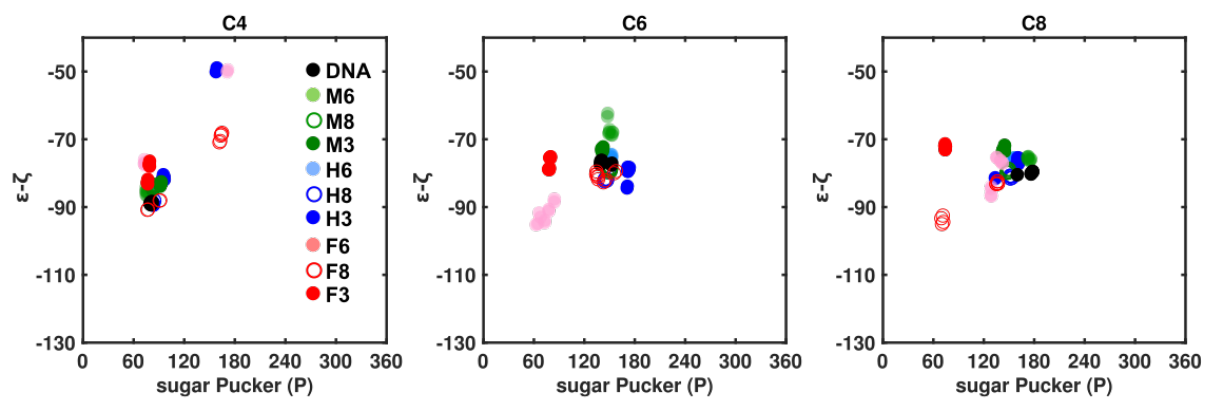

**Figure S6:** Correlation of  $\varepsilon\text{-}\zeta$  values to the sugar pucker (P) for DNA<sup>control</sup> and DNA<sup>N#</sup>. Backbone conformation defined by  $\varepsilon\text{-}\zeta < 0$  for BI and  $\varepsilon\text{-}\zeta > 0$  for BII. Here **C4**, **C6**, **C8** nucleotides sample BI conformation canonical to B-DNA

**Table S4:** Structural parameters for Xplor-NIH refined structures of DNA<sup>control</sup> and DNA<sup>N#</sup>. Average (Avg) and standard deviation (std) are for ensemble of 5 structures

| Tip (°)    |                        |      |                   |      |                   |      |                   |      |                   |      |                   |      |                   |      |                   |      |                   |      |                   |      |
|------------|------------------------|------|-------------------|------|-------------------|------|-------------------|------|-------------------|------|-------------------|------|-------------------|------|-------------------|------|-------------------|------|-------------------|------|
| Base Steps | DNA <sup>control</sup> |      | DNA <sup>M6</sup> |      | DNA <sup>M8</sup> |      | DNA <sup>M3</sup> |      | DNA <sup>H6</sup> |      | DNA <sup>H8</sup> |      | DNA <sup>H3</sup> |      | DNA <sup>F6</sup> |      | DNA <sup>F8</sup> |      | DNA <sup>F3</sup> |      |
|            | Avg                    | Std  | Avg               | Std  | Avg               | Std  | Avg               | Std  | Avg               | Std  | Avg               | Std  | Avg               | Std  | Avg               | Std  | Avg               | Std  | Avg               | Std  |
| 01CT/11AG  | -0.32                  | 0.49 | -4.74             | 0.44 | 0.59              | 0.17 | -1.31             | 2.15 | -3.43             | 0.28 | 0.46              | 1.08 | -7.33             | 1.32 | -1.56             | 2.71 | -0.57             | 0.83 | -4.53             | 1.87 |
| 02TA/10TA  | 1.91                   | 0.48 | 2.9               | 0.32 | -0.41             | 0.1  | 4.61              | 0.18 | 0.85              | 0.09 | -0.67             | 0.23 | 0.47              | 0.4  | -1.69             | 1.04 | -1.7              | 0.57 | 9.47              | 0.42 |
| 03AC/09GT  | -1.26                  | 1.53 | 2.16              | 1.06 | -0.01             | 0.35 | -2.52             | 0.19 | 7.97              | 0.1  | 1.35              | 0.49 | 2.43              | 0.41 | 0.39              | 4.3  | -0.12             | 2.46 | -1.28             | 0.18 |
| 04CG/08CG  | -6.36                  | 0.12 | -6.96             | 0.12 | -5.91             | 0.21 | -6.65             | 0.11 | -6.82             | 0.09 | -5.97             | 0.19 | -1.66             | 4.51 | 5.3               | 1.64 | 6.88              | 6.2  | -2.91             | 0.17 |
| 05GC/07GC  | -0.57                  | 0.86 | 8.86              | 0.52 | 2.88              | 0.08 | 3.1               | 0.16 | 1.99              | 0.17 | 1.92              | 0.19 | 2.8               | 1.19 | 2.33              | 0.63 | -0.46             | 1.19 | 3.11              | 0.13 |
| 06CG/06CG  | -0.05                  | 0.01 | 0                 | 0.02 | -0.04             | 0.02 | -0.04             | 0.02 | -0.02             | 0.01 | -0.06             | 0.01 | -0.03             | 0.01 | 1.3               | 1.81 | -0.03             | 2.12 | 0.34              | 0.01 |
| 07GC/05GC  | 0.21                   | 0.86 | -9.2              | 0.54 | -3.28             | 0.06 | -3.53             | 0.16 | -2.41             | 0.18 | -2.28             | 0.19 | -3.12             | 1.19 | -2.45             | 0.31 | 0.05              | 1.33 | -1.78             | 0.13 |
| 08CG/04CG  | 6.28                   | 0.11 | 6.27              | 0.12 | 5.79              | 0.21 | 6.56              | 0.1  | 6.73              | 0.09 | 5.81              | 0.19 | 1.45              | 4.49 | -4.91             | 2.23 | -6.98             | 6.25 | 3.68              | 0.18 |
| 09GT/03AC  | 1.3                    | 1.52 | -1.37             | 1.02 | 0.09              | 0.35 | 2.62              | 0.19 | -7.89             | 0.1  | -1.22             | 0.48 | -2.34             | 0.41 | -3.95             | 0.66 | 0.19              | 2.64 | 0.1               | 0.19 |
| 10TA/02TA  | -2.15                  | 0.48 | -3.16             | 0.31 | 0.2               | 0.1  | -4.84             | 0.19 | -1.09             | 0.1  | 0.43              | 0.22 | -0.65             | 0.4  | -0.17             | 1.23 | 1.49              | 0.53 | -8.3              | 0.4  |
| 11AG/01CT  | 0.29                   | 0.48 | 4.68              | 0.44 | -0.65             | 0.17 | 1.23              | 2.14 | 3.37              | 0.27 | -0.53             | 1.07 | 7.25              | 1.32 | 2.45              | 1.87 | 0.49              | 1    | 4.54              | 1.9  |

| X-displacement (Å) |                        |      |                   |      |                   |      |                   |      |                   |      |                   |      |                   |      |                   |      |                   |      |                   |      |
|--------------------|------------------------|------|-------------------|------|-------------------|------|-------------------|------|-------------------|------|-------------------|------|-------------------|------|-------------------|------|-------------------|------|-------------------|------|
| Base Steps         | DNA <sup>control</sup> |      | DNA <sup>M6</sup> |      | DNA <sup>M8</sup> |      | DNA <sup>M3</sup> |      | DNA <sup>H6</sup> |      | DNA <sup>H8</sup> |      | DNA <sup>H3</sup> |      | DNA <sup>F6</sup> |      | DNA <sup>F8</sup> |      | DNA <sup>F3</sup> |      |
|                    | Avg                    | Std  | Avg               | Std  | Avg               | Std  | Avg               | Std  | Avg               | Std  | Avg               | Std  | Avg               | Std  | Avg               | Std  | Avg               | Std  | Avg               | Std  |
| 01CT/11AG          | -2.76                  | 0.06 | -2.79             | 0.16 | -2.29             | 0.05 | -1.67             | 0.22 | -2.44             | 0.04 | -2.06             | 0.13 | -1.85             | 0.28 | -1.23             | 0.51 | -1.88             | 0.31 | -2.23             | 0.14 |
| 02TA/10TA          | -1.59                  | 0.23 | -1.18             | 0.16 | -0.88             | 0.04 | -0.95             | 0.07 | -1.49             | 0.03 | -1.69             | 0.15 | -0.85             | 0.04 | -2.24             | 0.47 | -0.89             | 0.36 | -0.54             | 0.04 |
| 03AC/09GT          | -2.64                  | 0.46 | -2.52             | 0.45 | -2.44             | 0.05 | -2.78             | 0.06 | -1.95             | 0.03 | -2.82             | 0.20 | -2.30             | 0.93 | 0.43              | 0.19 | -0.28             | 0.75 | -2.92             | 0.04 |
| 04CG/08CG          | 1.28                   | 0.18 | 0.79              | 0.13 | 0.79              | 0.02 | 1.22              | 0.02 | 1.60              | 0.02 | 0.58              | 0.03 | 0.32              | 0.19 | 0.58              | 0.55 | 0.32              | 0.29 | -0.23             | 0.05 |
| 05GC/07GC          | 1.30                   | 0.08 | 1.21              | 0.12 | 0.60              | 0.04 | 0.03              | 0.02 | 0.47              | 0.02 | 1.05              | 0.05 | 0.63              | 0.15 | 1.03              | 0.18 | 0.56              | 0.37 | -0.43             | 0.08 |
| 06CG/06CG          | -0.57                  | 0.12 | 1.58              | 0.36 | 0.70              | 0.04 | 0.34              | 0.04 | -0.03             | 0.03 | -0.56             | 0.05 | 1.04              | 0.37 | 0.72              | 0.14 | 0.70              | 0.17 | -1.01             | 0.06 |
| 07GC/05GC          | 1.30                   | 0.08 | 1.23              | 0.11 | 0.60              | 0.04 | 0.03              | 0.03 | 0.46              | 0.02 | 1.04              | 0.05 | 0.62              | 0.15 | 1.03              | 0.17 | 0.46              | 0.23 | -0.29             | 0.08 |
| 08CG/04CG          | 1.28                   | 0.19 | 0.71              | 0.12 | 0.78              | 0.02 | 1.22              | 0.03 | 1.59              | 0.02 | 0.58              | 0.03 | 0.32              | 0.19 | 0.57              | 0.54 | 0.44              | 0.12 | -0.29             | 0.05 |
| 09GT/03AC          | -2.64                  | 0.46 | -2.45             | 0.46 | -2.42             | 0.05 | -2.78             | 0.06 | -1.94             | 0.03 | -2.82             | 0.20 | -2.30             | 0.94 | 0.44              | 0.17 | -0.33             | 0.83 | -2.72             | 0.05 |
| 10TA/02TA          | -1.59                  | 0.23 | -1.19             | 0.16 | -0.88             | 0.04 | -0.96             | 0.07 | -1.49             | 0.03 | -1.69             | 0.14 | -0.86             | 0.04 | -2.24             | 0.48 | -0.81             | 0.48 | -0.59             | 0.04 |
| 11AG/01CT          | -2.77                  | 0.06 | -2.79             | 0.16 | -2.29             | 0.05 | -1.67             | 0.22 | -2.45             | 0.03 | -2.07             | 0.14 | -1.86             | 0.28 | -1.23             | 0.51 | -2.01             | 0.21 | -2.22             | 0.13 |

| Y-displacement (Å) |                        |      |                   |      |                   |      |                   |      |                   |      |                   |      |                   |      |                   |      |                   |      |                   |      |
|--------------------|------------------------|------|-------------------|------|-------------------|------|-------------------|------|-------------------|------|-------------------|------|-------------------|------|-------------------|------|-------------------|------|-------------------|------|
| Base Steps         | DNA <sup>control</sup> |      | DNA <sup>M6</sup> |      | DNA <sup>M8</sup> |      | DNA <sup>M3</sup> |      | DNA <sup>H6</sup> |      | DNA <sup>H8</sup> |      | DNA <sup>H3</sup> |      | DNA <sup>F6</sup> |      | DNA <sup>F8</sup> |      | DNA <sup>F3</sup> |      |
|                    | Avg                    | Std  | Avg               | Std  | Avg               | Std  | Avg               | Std  | Avg               | Std  | Avg               | Std  | Avg               | Std  | Avg               | Std  | Avg               | Std  | Avg               | Std  |
| 01CT/11AG          | 0.80                   | 0.08 | 1.17              | 0.05 | 0.71              | 0.03 | 0.93              | 0.27 | 0.99              | 0.04 | 0.79              | 0.18 | 1.53              | 0.17 | 1.04              | 0.14 | 0.96              | 0.32 | 1.14              | 0.28 |
| 02TA/10TA          | -0.05                  | 0.04 | -0.10             | 0.03 | 0.15              | 0.01 | -0.49             | 0.03 | 0.09              | 0.02 | 0.02              | 0.06 | -0.07             | 0.05 | 0.12              | 0.17 | 0.34              | 0.09 | -0.75             | 0.04 |
| 03AC/09GT          | 0.56                   | 0.26 | 0.04              | 0.07 | -0.01             | 0.02 | 0.15              | 0.08 | -0.37             | 0.01 | -0.18             | 0.10 | -0.17             | 0.21 | 0.31              | 0.52 | 0.37              | 0.23 | -0.08             | 0.04 |
| 04CG/08CG          | 0.69                   | 0.05 | 0.75              | 0.04 | 0.74              | 0.01 | 0.75              | 0.02 | 0.79              | 0.01 | 0.86              | 0.02 | 0.48              | 0.31 | 0.01              | 0.59 | -0.17             | 0.05 | 0.08              | 0.01 |
| 05GC/07GC          | -0.50                  | 0.20 | -1.45             | 0.09 | 0.07              | 0.02 | -0.29             | 0.02 | -0.49             | 0.02 | 0.18              | 0.04 | 0.41              | 0.11 | -0.10             | 0.15 | 0.14              | 0.26 | -0.26             | 0.07 |
| 06CG/06CG          | -0.01                  | 0.00 | -0.02             | 0.01 | -0.01             | 0.00 | -0.01             | 0.01 | -0.01             | 0.00 | -0.01             | 0.00 | -0.01             | 0.00 | -0.01             | 0.22 | -0.14             | 0.18 | 0.02              | 0.00 |
| 07GC/05GC          | 0.51                   | 0.20 | 1.45              | 0.09 | -0.05             | 0.02 | 0.30              | 0.02 | 0.51              | 0.02 | -0.17             | 0.04 | -0.40             | 0.11 | 0.12              | 0.12 | -0.16             | 0.32 | 0.17              | 0.07 |
| 08CG/04CG          | -0.70                  | 0.05 | -0.69             | 0.04 | -0.74             | 0.01 | -0.76             | 0.02 | -0.79             | 0.01 | -0.86             | 0.02 | -0.47             | 0.31 | -0.01             | 0.59 | 0.11              | 0.14 | -0.08             | 0.01 |
| 09GT/03AC          | -0.58                  | 0.26 | -0.14             | 0.08 | -0.02             | 0.03 | -0.17             | 0.08 | 0.35              | 0.01 | 0.15              | 0.10 | 0.15              | 0.21 | -0.32             | 0.52 | -0.03             | 0.70 | 0.23              | 0.04 |
| 10TA/02TA          | 0.05                   | 0.04 | 0.11              | 0.03 | -0.15             | 0.01 | 0.50              | 0.04 | -0.09             | 0.02 | -0.02             | 0.05 | 0.08              | 0.05 | -0.12             | 0.17 | -0.24             | 0.07 | 0.68              | 0.03 |
| 11AG/01CT          | -0.82                  | 0.08 | -1.18             | 0.05 | -0.72             | 0.03 | -0.94             | 0.26 | -1.00             | 0.04 | -0.80             | 0.18 | -1.54             | 0.17 | -1.05             | 0.15 | -1.09             | 0.21 | -1.10             | 0.29 |



| Helical Rise (Å) |                        |      |                   |      |                   |      |                   |      |                   |      |                   |      |                   |      |                   |      |                   |      |                   |      |
|------------------|------------------------|------|-------------------|------|-------------------|------|-------------------|------|-------------------|------|-------------------|------|-------------------|------|-------------------|------|-------------------|------|-------------------|------|
| Base Steps       | DNA <sup>control</sup> |      | DNA <sup>M6</sup> |      | DNA <sup>M8</sup> |      | DNA <sup>M3</sup> |      | DNA <sup>H6</sup> |      | DNA <sup>H8</sup> |      | DNA <sup>H3</sup> |      | DNA <sup>F6</sup> |      | DNA <sup>F8</sup> |      | DNA <sup>F3</sup> |      |
|                  | Avg                    | Std  | Avg               | Std  | Avg               | Std  | Avg               | Std  | Avg               | Std  | Avg               | Std  | Avg               | Std  | Avg               | Std  | Avg               | Std  | Avg               | Std  |
| 01CT/11AG        | 3.14                   | 0.01 | 3.15              | 0.04 | 3.23              | 0.02 | 3.22              | 0.02 | 2.95              | 0.08 | 3.21              | 0.01 | 3.15              | 0.07 | 3.20              | 0.06 | 3.38              | 0.08 | 3.17              | 0.06 |
| 02TA/10TA        | 3.35                   | 0.12 | 3.34              | 0.03 | 3.48              | 0.08 | 3.62              | 0.02 | 3.40              | 0.05 | 3.46              | 0.02 | 3.23              | 0.10 | 3.20              | 0.01 | 2.85              | 0.18 | 3.50              | 0.06 |
| 03AC/09GT        | 3.55                   | 0.02 | 3.77              | 0.02 | 3.63              | 0.05 | 3.70              | 0.02 | 3.27              | 0.14 | 3.71              | 0.01 | 3.49              | 0.02 | 3.42              | 0.03 | 3.15              | 0.36 | 3.20              | 0.17 |
| 04CG/08CG        | 3.30                   | 0.03 | 3.23              | 0.02 | 3.48              | 0.02 | 3.52              | 0.01 | 3.23              | 0.03 | 3.26              | 0.02 | 3.22              | 0.02 | 3.20              | 0.02 | 3.33              | 0.06 | 3.53              | 0.19 |
| 05GC/07GC        | 3.36                   | 0.02 | 3.46              | 0.01 | 3.71              | 0.06 | 3.72              | 0.02 | 3.49              | 0.19 | 3.67              | 0.01 | 3.20              | 0.01 | 3.69              | 0.02 | 3.43              | 0.17 | 3.42              | 0.05 |
| 06CG/06CG        | 3.83                   | 0.03 | 3.71              | 0.01 | 4.69              | 0.12 | 3.84              | 0.02 | 3.30              | 0.06 | 3.73              | 0.01 | 4.19              | 0.02 | 3.45              | 0.02 | 3.20              | 0.07 | 3.13              | 0.17 |
| 07GC/05GC        | 3.36                   | 0.02 | 3.46              | 0.01 | 3.71              | 0.06 | 3.71              | 0.02 | 3.49              | 0.19 | 3.66              | 0.01 | 3.20              | 0.01 | 3.72              | 0.02 | 3.42              | 0.17 | 3.56              | 0.24 |
| 08CG/04CG        | 3.30                   | 0.03 | 3.24              | 0.02 | 3.51              | 0.02 | 3.53              | 0.01 | 3.23              | 0.03 | 3.26              | 0.01 | 3.23              | 0.01 | 3.19              | 0.01 | 3.34              | 0.06 | 3.38              | 0.02 |
| 09GT/03AC        | 3.55                   | 0.02 | 3.77              | 0.02 | 3.62              | 0.04 | 3.70              | 0.02 | 3.27              | 0.15 | 3.71              | 0.01 | 3.49              | 0.03 | 3.46              | 0.03 | 3.14              | 0.36 | 3.26              | 0.26 |
| 10TA/02TA        | 3.34                   | 0.12 | 3.33              | 0.02 | 3.47              | 0.08 | 3.61              | 0.01 | 3.39              | 0.05 | 3.45              | 0.02 | 3.23              | 0.10 | 3.20              | 0.01 | 2.84              | 0.19 | 3.49              | 0.05 |
| 11AG/01CT        | 3.14                   | 0.01 | 3.15              | 0.04 | 3.22              | 0.02 | 3.22              | 0.02 | 2.95              | 0.09 | 3.21              | 0.01 | 3.16              | 0.07 | 3.23              | 0.05 | 3.38              | 0.08 | 3.17              | 0.07 |

| Helical Twist (°) |                        |     |                   |     |                   |     |                   |     |                   |     |                   |     |                   |     |                   |     |                   |     |                   |     |
|-------------------|------------------------|-----|-------------------|-----|-------------------|-----|-------------------|-----|-------------------|-----|-------------------|-----|-------------------|-----|-------------------|-----|-------------------|-----|-------------------|-----|
| Base Steps        | DNA <sup>control</sup> |     | DNA <sup>M6</sup> |     | DNA <sup>M8</sup> |     | DNA <sup>M3</sup> |     | DNA <sup>H6</sup> |     | DNA <sup>H8</sup> |     | DNA <sup>H3</sup> |     | DNA <sup>F6</sup> |     | DNA <sup>F8</sup> |     | DNA <sup>F3</sup> |     |
|                   | Avg                    | Std | Avg               | Std | Avg               | Std | Avg               | Std | Avg               | Std | Avg               | Std | Avg               | Std | Avg               | Std | Avg               | Std | Avg               | Std |
| 01CT/11AG         | 32.8                   | 0.2 | 33.9              | 0.2 | 32.2              | 0.1 | 32.3              | 0.6 | 33.3              | 0.2 | 32.8              | 1.3 | 31.9              | 0.6 | 31.9              | 0.5 | 33.4              | 1.9 | 34.4              | 2.8 |
| 02TA/10TA         | 36.3                   | 0.5 | 35.1              | 0.5 | 37.1              | 0.2 | 34.6              | 0.2 | 36.0              | 0.1 | 35.5              | 0.4 | 38.1              | 0.3 | 39.1              | 0.7 | 35.4              | 1.4 | 35.7              | 0.4 |
| 03AC/09GT         | 30.8                   | 0.3 | 30.4              | 0.1 | 30.4              | 0.1 | 30.7              | 0.1 | 30.3              | 0.1 | 31.0              | 0.3 | 32.0              | 1.2 | 35.3              | 0.5 | 34.3              | 1.9 | 28.9              | 0.1 |
| 04CG/08CG         | 36.8                   | 0.6 | 35.2              | 0.6 | 34.1              | 0.2 | 38.8              | 0.1 | 37.4              | 0.2 | 35.6              | 0.2 | 36.9              | 2.4 | 44.0              | 2.5 | 38.2              | 3.0 | 39.9              | 0.1 |
| 05GC/07GC         | 39.0                   | 0.1 | 37.2              | 0.5 | 37.0              | 0.1 | 35.6              | 0.1 | 37.6              | 0.1 | 38.1              | 0.2 | 39.7              | 1.6 | 39.2              | 1.6 | 38.5              | 1.2 | 31.2              | 0.2 |
| 06CG/06CG         | 36.3                   | 0.2 | 35.0              | 1.2 | 35.5              | 0.3 | 38.9              | 0.3 | 35.1              | 0.2 | 37.1              | 0.4 | 37.9              | 0.3 | 37.4              | 0.7 | 38.8              | 0.2 | 39.3              | 0.1 |
| 07GC/05GC         | 39.0                   | 0.1 | 37.2              | 0.5 | 37.0              | 0.2 | 35.6              | 0.1 | 37.5              | 0.1 | 38.0              | 0.2 | 39.6              | 1.6 | 39.2              | 1.6 | 38.3              | 1.3 | 31.3              | 0.2 |
| 08CG/04CG         | 36.8                   | 0.6 | 35.0              | 0.5 | 34.1              | 0.2 | 38.8              | 0.1 | 37.4              | 0.1 | 35.6              | 0.2 | 36.9              | 2.4 | 44.0              | 2.6 | 38.1              | 3.1 | 40.2              | 0.1 |
| 09GT/03AC         | 30.8                   | 0.3 | 30.4              | 0.1 | 30.4              | 0.1 | 30.7              | 0.1 | 30.3              | 0.1 | 31.0              | 0.4 | 32.0              | 1.2 | 35.3              | 0.6 | 34.1              | 2.2 | 28.8              | 0.1 |
| 10TA/02TA         | 36.3                   | 0.5 | 35.1              | 0.5 | 37.0              | 0.2 | 34.6              | 0.2 | 36.1              | 0.1 | 35.5              | 0.4 | 38.1              | 0.3 | 39.1              | 0.7 | 35.3              | 1.3 | 35.6              | 0.4 |
| 11AG/01CT         | 32.7                   | 0.2 | 33.9              | 0.2 | 32.2              | 0.2 | 32.2              | 0.6 | 33.3              | 0.2 | 32.7              | 1.3 | 31.8              | 0.6 | 31.9              | 0.5 | 33.7              | 1.8 | 34.5              | 2.8 |

| Inclination (°) |                        |     |                   |     |                   |     |                   |     |                   |     |                   |     |                   |     |                   |     |                   |     |                   |     |
|-----------------|------------------------|-----|-------------------|-----|-------------------|-----|-------------------|-----|-------------------|-----|-------------------|-----|-------------------|-----|-------------------|-----|-------------------|-----|-------------------|-----|
| Base Steps      | DNA <sup>control</sup> |     | DNA <sup>M6</sup> |     | DNA <sup>M8</sup> |     | DNA <sup>M3</sup> |     | DNA <sup>H6</sup> |     | DNA <sup>H8</sup> |     | DNA <sup>H3</sup> |     | DNA <sup>F6</sup> |     | DNA <sup>F8</sup> |     | DNA <sup>F3</sup> |     |
|                 | Avg                    | Std | Avg               | Std | Avg               | Std | Avg               | Std | Avg               | Std | Avg               | Std | Avg               | Std | Avg               | Std | Avg               | Std | Avg               | Std |
| 01CT/11AG       | 25.2                   | 0.2 | 30.5              | 1.4 | 17.8              | 0.5 | 13.8              | 1.9 | 25.0              | 0.4 | 14.5              | 3.0 | 8.0               | 2.7 | 7.0               | 3.8 | 22.6              | 4.2 | 28.4              | 1.8 |
| 02TA/10TA       | 17.7                   | 4.7 | 15.8              | 3.3 | 9.5               | 0.2 | 8.8               | 1.4 | 20.4              | 0.1 | 15.6              | 3.2 | 4.2               | 1.4 | 29.2              | 2.6 | 13.0              | 4.9 | 11.6              | 0.8 |
| 03AC/09GT       | 10.4                   | 4.1 | 11.9              | 3.9 | 10.5              | 0.2 | 9.2               | 0.5 | 5.3               | 0.1 | 10.4              | 2.4 | 6.9               | 7.6 | -16.6             | 7.7 | -1.6              | 5.7 | 6.9               | 0.4 |
| 04CG/08CG       | -1.3                   | 0.8 | 4.5               | 1.1 | 2.5               | 0.1 | -4.1              | 0.2 | -6.3              | 0.3 | 0.9               | 0.3 | 1.0               | 4.1 | -3.0              | 5.5 | 1.1               | 7.8 | 11.3              | 0.5 |
| 05GC/07GC       | -2.9                   | 0.3 | 0.2               | 0.4 | 4.3               | 0.2 | 4.8               | 0.2 | 3.8               | 0.2 | -2.6              | 0.2 | -0.3              | 5.9 | -14.0             | 2.0 | -8.1              | 0.9 | -16.5             | 0.4 |
| 06CG/06CG       | 13.5                   | 0.9 | -3.3              | 1.4 | 4.1               | 0.1 | 2.5               | 0.4 | 5.8               | 0.2 | 13.6              | 0.8 | -4.0              | 0.4 | -0.4              | 2.0 | -6.9              | 1.4 | 16.9              | 0.2 |
| 07GC/05GC       | -2.8                   | 0.3 | 0.0               | 0.4 | 4.4               | 0.2 | 4.9               | 0.2 | 3.9               | 0.2 | -2.5              | 0.2 | -0.2              | 5.9 | -13.9             | 2.0 | -8.2              | 0.7 | -17.6             | 0.4 |
| 08CG/04CG       | -1.2                   | 0.8 | 5.4               | 1.0 | 2.7               | 0.1 | -3.9              | 0.2 | -6.1              | 0.3 | 1.0               | 0.3 | 1.0               | 4.1 | -2.8              | 5.5 | -1.3              | 4.2 | 11.6              | 0.5 |
| 09GT/03AC       | 10.4                   | 4.2 | 11.5              | 4.0 | 10.4              | 0.2 | 9.2               | 0.6 | 5.2               | 0.2 | 10.4              | 2.4 | 6.9               | 7.7 | -16.8             | 7.6 | -2.4              | 4.8 | 5.2               | 0.4 |
| 10TA/02TA       | 17.7                   | 4.7 | 15.8              | 3.3 | 9.6               | 0.2 | 8.8               | 1.5 | 20.4              | 0.1 | 15.6              | 3.2 | 4.2               | 1.5 | 29.2              | 2.4 | 12.8              | 5.4 | 12.4              | 0.8 |
| 11AG/01CT       | 25.2                   | 0.2 | 30.5              | 1.5 | 17.8              | 0.5 | 13.8              | 1.9 | 25.0              | 0.4 | 14.5              | 3.0 | 8.0               | 2.7 | 7.0               | 3.8 | 24.3              | 3.0 | 28.1              | 1.8 |

| Shear (Å) |                        |      |                   |      |                   |      |                   |      |                   |      |                   |      |                   |      |                   |      |                   |      |                   |      |
|-----------|------------------------|------|-------------------|------|-------------------|------|-------------------|------|-------------------|------|-------------------|------|-------------------|------|-------------------|------|-------------------|------|-------------------|------|
| Base Pair | DNA <sup>control</sup> |      | DNA <sup>M6</sup> |      | DNA <sup>M8</sup> |      | DNA <sup>M3</sup> |      | DNA <sup>H6</sup> |      | DNA <sup>H8</sup> |      | DNA <sup>H3</sup> |      | DNA <sup>F6</sup> |      | DNA <sup>F8</sup> |      | DNA <sup>F3</sup> |      |
|           | Avg                    | Std  | Avg               | Std  | Avg               | Std  | Avg               | Std  | Avg               | Std  | Avg               | Std  | Avg               | Std  | Avg               | Std  | Avg               | Std  | Avg               | Std  |
| 01C-12G   | 0.11                   | 0.01 | 0.09              | 0.00 | 0.09              | 0.00 | 0.08              | 0.01 | 0.08              | 0.01 | 0.10              | 0.00 | 0.09              | 0.01 | 0.04              | 0.01 | 0.08              | 0.00 | 0.09              | 0.01 |
| 02T-11A   | -0.03                  | 0.01 | -0.06             | 0.01 | -0.05             | 0.01 | -0.05             | 0.01 | -0.04             | 0.00 | -0.05             | 0.01 | -0.02             | 0.01 | -0.04             | 0.01 | -0.03             | 0.01 | -0.03             | 0.00 |
| 03A-10T   | -0.01                  | 0.03 | -0.01             | 0.02 | 0.02              | 0.01 | 0.03              | 0.00 | -0.06             | 0.00 | -0.01             | 0.01 | 0.01              | 0.01 | 0.01              | 0.01 | -0.03             | 0.01 | 0.00              | 0.00 |
| 04C-09G   | 0.02                   | 0.01 | 0.04              | 0.01 | 0.08              | 0.00 | 0.08              | 0.00 | 0.05              | 0.00 | 0.09              | 0.01 | 0.07              | 0.01 | 0.12              | 0.04 | 0.13              | 0.01 | 0.10              | 0.01 |
| 05G-08C   | -0.06                  | 0.00 | -0.03             | 0.01 | -0.05             | 0.00 | -0.11             | 0.01 | -0.10             | 0.01 | -0.05             | 0.00 | -0.06             | 0.01 | -0.07             | 0.04 | -0.10             | 0.02 | -0.05             | 0.01 |
| 06C-07G   | 0.08                   | 0.00 | 0.07              | 0.01 | 0.08              | 0.00 | 0.11              | 0.00 | 0.07              | 0.00 | 0.10              | 0.00 | 0.07              | 0.01 | 0.11              | 0.02 | 0.07              | 0.01 | 0.08              | 0.00 |
| 07G-06C   | -0.09                  | 0.01 | -0.07             | 0.01 | -0.09             | 0.01 | -0.11             | 0.00 | -0.08             | 0.01 | -0.11             | 0.00 | -0.08             | 0.01 | -0.12             | 0.02 | -0.06             | 0.01 | -0.07             | 0.00 |
| 08C-05G   | 0.06                   | 0.00 | 0.03              | 0.01 | 0.05              | 0.01 | 0.10              | 0.01 | 0.09              | 0.00 | 0.05              | 0.00 | 0.06              | 0.01 | 0.07              | 0.04 | 0.09              | 0.01 | 0.05              | 0.00 |
| 09G-04C   | -0.02                  | 0.01 | -0.05             | 0.01 | -0.08             | 0.01 | -0.08             | 0.00 | -0.05             | 0.00 | -0.09             | 0.01 | -0.07             | 0.01 | -0.13             | 0.03 | -0.11             | 0.02 | -0.08             | 0.01 |
| 10T-03A   | 0.01                   | 0.03 | 0.01              | 0.02 | -0.02             | 0.01 | -0.03             | 0.00 | 0.06              | 0.00 | 0.01              | 0.01 | -0.01             | 0.01 | -0.02             | 0.01 | 0.03              | 0.00 | 0.01              | 0.00 |
| 11A-02T   | 0.04                   | 0.01 | 0.06              | 0.00 | 0.05              | 0.01 | 0.05              | 0.01 | 0.04              | 0.00 | 0.05              | 0.00 | 0.02              | 0.01 | 0.04              | 0.01 | 0.03              | 0.01 | 0.03              | 0.00 |
| 12G-01C   | -0.10                  | 0.01 | -0.08             | 0.00 | -0.09             | 0.01 | -0.07             | 0.01 | -0.08             | 0.00 | -0.09             | 0.01 | -0.09             | 0.01 | -0.04             | 0.01 | -0.08             | 0.01 | -0.09             | 0.00 |

| Stretch (Å) |                        |      |                   |      |                   |      |                   |      |                   |      |                   |      |                   |      |                   |      |                   |      |                   |      |
|-------------|------------------------|------|-------------------|------|-------------------|------|-------------------|------|-------------------|------|-------------------|------|-------------------|------|-------------------|------|-------------------|------|-------------------|------|
| Base Pair   | DNA <sup>control</sup> |      | DNA <sup>M6</sup> |      | DNA <sup>M8</sup> |      | DNA <sup>M3</sup> |      | DNA <sup>H6</sup> |      | DNA <sup>H8</sup> |      | DNA <sup>H3</sup> |      | DNA <sup>F6</sup> |      | DNA <sup>F8</sup> |      | DNA <sup>F3</sup> |      |
|             | Avg                    | Std  | Avg               | Std  | Avg               | Std  | Avg               | Std  | Avg               | Std  | Avg               | Std  | Avg               | Std  | Avg               | Std  | Avg               | Std  | Avg               | Std  |
| 01C-12G     | -0.20                  | 0.01 | -0.16             | 0.00 | -0.20             | 0.00 | -0.16             | 0.01 | -0.17             | 0.00 | -0.19             | 0.01 | -0.18             | 0.01 | -0.17             | 0.00 | -0.17             | 0.00 | -0.17             | 0.00 |
| 02T-11A     | -0.08                  | 0.01 | -0.08             | 0.00 | -0.09             | 0.00 | -0.08             | 0.00 | -0.08             | 0.00 | -0.10             | 0.00 | -0.12             | 0.01 | -0.18             | 0.03 | -0.10             | 0.01 | -0.10             | 0.00 |
| 03A-10T     | -0.13                  | 0.01 | -0.12             | 0.01 | -0.12             | 0.00 | -0.11             | 0.01 | -0.15             | 0.01 | -0.12             | 0.01 | -0.12             | 0.01 | -0.11             | 0.01 | -0.14             | 0.01 | -0.13             | 0.01 |
| 04C-09G     | -0.20                  | 0.00 | -0.20             | 0.00 | -0.18             | 0.00 | -0.18             | 0.00 | -0.18             | 0.00 | -0.19             | 0.00 | -0.18             | 0.00 | -0.22             | 0.04 | -0.18             | 0.00 | -0.18             | 0.00 |
| 05G-08C     | -0.18                  | 0.00 | -0.18             | 0.01 | -0.17             | 0.00 | -0.19             | 0.00 | -0.18             | 0.00 | -0.17             | 0.01 | -0.18             | 0.02 | -0.24             | 0.03 | -0.22             | 0.00 | -0.21             | 0.01 |
| 06C-07G     | -0.18                  | 0.00 | -0.26             | 0.01 | -0.19             | 0.00 | -0.20             | 0.00 | -0.19             | 0.00 | -0.19             | 0.00 | -0.21             | 0.04 | -0.26             | 0.02 | -0.23             | 0.03 | -0.17             | 0.00 |
| 07G-06C     | -0.18                  | 0.00 | -0.26             | 0.01 | -0.19             | 0.00 | -0.20             | 0.00 | -0.19             | 0.00 | -0.19             | 0.00 | -0.21             | 0.04 | -0.26             | 0.02 | -0.24             | 0.01 | -0.17             | 0.00 |
| 08C-05G     | -0.18                  | 0.00 | -0.19             | 0.00 | -0.17             | 0.00 | -0.19             | 0.00 | -0.18             | 0.00 | -0.18             | 0.01 | -0.18             | 0.02 | -0.24             | 0.02 | -0.22             | 0.01 | -0.21             | 0.01 |
| 09G-04C     | -0.20                  | 0.00 | -0.20             | 0.00 | -0.18             | 0.00 | -0.19             | 0.01 | -0.18             | 0.00 | -0.19             | 0.00 | -0.18             | 0.01 | -0.22             | 0.04 | -0.18             | 0.01 | -0.18             | 0.00 |
| 10T-03A     | -0.13                  | 0.01 | -0.12             | 0.01 | -0.12             | 0.00 | -0.11             | 0.00 | -0.14             | 0.00 | -0.12             | 0.01 | -0.12             | 0.01 | -0.10             | 0.01 | -0.14             | 0.01 | -0.14             | 0.01 |
| 11A-02T     | -0.08                  | 0.01 | -0.08             | 0.00 | -0.09             | 0.00 | -0.08             | 0.00 | -0.08             | 0.00 | -0.10             | 0.00 | -0.12             | 0.01 | -0.18             | 0.03 | -0.10             | 0.02 | -0.10             | 0.00 |
| 12G-01C     | -0.20                  | 0.01 | -0.16             | 0.00 | -0.20             | 0.00 | -0.17             | 0.01 | -0.17             | 0.00 | -0.19             | 0.01 | -0.18             | 0.01 | -0.17             | 0.00 | -0.17             | 0.00 | -0.17             | 0.00 |

| Stagger (Å) |                        |      |                   |      |                   |      |                   |      |                   |      |                   |      |                   |      |                   |      |                   |      |                   |      |
|-------------|------------------------|------|-------------------|------|-------------------|------|-------------------|------|-------------------|------|-------------------|------|-------------------|------|-------------------|------|-------------------|------|-------------------|------|
| Base Pair   | DNA <sup>control</sup> |      | DNA <sup>M6</sup> |      | DNA <sup>M8</sup> |      | DNA <sup>M3</sup> |      | DNA <sup>H6</sup> |      | DNA <sup>H8</sup> |      | DNA <sup>H3</sup> |      | DNA <sup>F6</sup> |      | DNA <sup>F8</sup> |      | DNA <sup>F3</sup> |      |
|             | Avg                    | Std  | Avg               | Std  | Avg               | Std  | Avg               | Std  | Avg               | Std  | Avg               | Std  | Avg               | Std  | Avg               | Std  | Avg               | Std  | Avg               | Std  |
| 01C-12G     | -0.19                  | 0.02 | 0.18              | 0.03 | -0.14             | 0.01 | 0.04              | 0.09 | 0.06              | 0.01 | -0.11             | 0.02 | -0.03             | 0.06 | -0.13             | 0.01 | 0.01              | 0.04 | 0.05              | 0.02 |
| 02T-11A     | 0.13                   | 0.10 | 0.06              | 0.08 | 0.25              | 0.01 | 0.12              | 0.03 | 0.01              | 0.01 | 0.26              | 0.01 | 0.16              | 0.03 | 0.32              | 0.09 | 0.09              | 0.07 | -0.13             | 0.05 |
| 03A-10T     | 0.12                   | 0.09 | 0.07              | 0.04 | 0.18              | 0.01 | 0.23              | 0.02 | -0.16             | 0.01 | 0.12              | 0.03 | 0.06              | 0.08 | 0.06              | 0.09 | -0.10             | 0.06 | 0.25              | 0.01 |
| 04C-09G     | 0.44                   | 0.04 | 0.36              | 0.04 | 0.26              | 0.03 | 0.24              | 0.01 | 0.44              | 0.01 | 0.36              | 0.02 | 0.25              | 0.19 | 0.12              | 0.14 | -0.16             | 0.13 | 0.14              | 0.01 |
| 05G-08C     | -0.11                  | 0.02 | -0.29             | 0.04 | -0.13             | 0.01 | -0.09             | 0.01 | -0.02             | 0.01 | -0.06             | 0.01 | 0.11              | 0.19 | 0.51              | 0.23 | 0.29              | 0.18 | 0.09              | 0.01 |
| 06C-07G     | 0.06                   | 0.02 | 0.63              | 0.04 | 0.17              | 0.00 | 0.19              | 0.01 | 0.24              | 0.01 | -0.01             | 0.01 | 0.29              | 0.13 | 0.43              | 0.13 | 0.40              | 0.20 | 0.20              | 0.01 |
| 07G-06C     | 0.06                   | 0.02 | 0.64              | 0.04 | 0.18              | 0.01 | 0.19              | 0.01 | 0.25              | 0.01 | -0.01             | 0.02 | 0.30              | 0.13 | 0.43              | 0.15 | 0.54              | 0.02 | 0.18              | 0.01 |
| 08C-05G     | -0.12                  | 0.02 | -0.31             | 0.04 | -0.14             | 0.01 | -0.10             | 0.01 | -0.03             | 0.01 | -0.07             | 0.01 | 0.10              | 0.18 | 0.51              | 0.23 | 0.43              | 0.03 | 0.13              | 0.01 |
| 09G-04C     | 0.43                   | 0.05 | 0.32              | 0.04 | 0.25              | 0.03 | 0.23              | 0.01 | 0.43              | 0.01 | 0.35              | 0.02 | 0.24              | 0.18 | 0.11              | 0.15 | 0.05              | 0.16 | 0.16              | 0.01 |
| 10T-03A     | 0.13                   | 0.08 | 0.08              | 0.04 | 0.19              | 0.01 | 0.23              | 0.02 | -0.15             | 0.01 | 0.12              | 0.03 | 0.06              | 0.08 | 0.07              | 0.08 | -0.11             | 0.04 | 0.21              | 0.01 |
| 11A-02T     | 0.13                   | 0.09 | 0.06              | 0.08 | 0.25              | 0.01 | 0.12              | 0.03 | 0.01              | 0.01 | 0.26              | 0.01 | 0.16              | 0.03 | 0.32              | 0.09 | 0.03              | 0.02 | -0.11             | 0.05 |
| 12G-01C     | -0.18                  | 0.02 | 0.18              | 0.03 | -0.13             | 0.02 | 0.05              | 0.08 | 0.06              | 0.01 | -0.11             | 0.01 | -0.03             | 0.06 | -0.13             | 0.01 | 0.01              | 0.03 | 0.04              | 0.02 |

| Buckle (°) |                        |     |                   |     |                   |     |                   |     |                   |     |                   |     |                   |     |                   |     |                   |     |                   |     |
|------------|------------------------|-----|-------------------|-----|-------------------|-----|-------------------|-----|-------------------|-----|-------------------|-----|-------------------|-----|-------------------|-----|-------------------|-----|-------------------|-----|
| Base Pair  | DNA <sup>control</sup> |     | DNA <sup>M6</sup> |     | DNA <sup>M8</sup> |     | DNA <sup>M3</sup> |     | DNA <sup>H6</sup> |     | DNA <sup>H8</sup> |     | DNA <sup>H3</sup> |     | DNA <sup>F6</sup> |     | DNA <sup>F8</sup> |     | DNA <sup>F3</sup> |     |
|            | Avg                    | Std | Avg               | Std | Avg               | Std | Avg               | Std | Avg               | Std | Avg               | Std | Avg               | Std | Avg               | Std | Avg               | Std | Avg               | Std |
| 01C-12G    | -9.0                   | 0.4 | -11.1             | 0.1 | -10.9             | 0.5 | -11.9             | 2.2 | -10.7             | 0.6 | -8.0              | 0.8 | -5.8              | 1.7 | -0.9              | 1.2 | -6.7              | 0.7 | -9.9              | 0.4 |
| 02T-11A    | -3.7                   | 0.3 | -7.7              | 0.5 | -5.6              | 0.1 | -5.0              | 0.3 | -5.1              | 0.0 | -4.9              | 0.3 | -0.4              | 2.6 | 3.0               | 1.0 | 1.2               | 0.2 | -4.2              | 0.1 |
| 03A-10T    | -1.5                   | 0.3 | -3.8              | 0.3 | -4.8              | 0.1 | 1.9               | 0.1 | -3.7              | 0.1 | -2.6              | 0.3 | -3.8              | 3.1 | 5.0               | 1.6 | -0.7              | 1.2 | 6.5               | 0.2 |
| 04C-09G    | -11.5                  | 0.5 | -9.7              | 0.7 | -9.5              | 0.2 | -8.4              | 0.1 | -12.0             | 0.1 | -9.6              | 0.2 | -5.0              | 8.2 | 13.3              | 7.0 | 8.3               | 3.6 | -5.8              | 0.2 |
| 05G-08C    | -0.8                   | 0.5 | -0.7              | 0.7 | -0.4              | 0.1 | 3.0               | 0.1 | 1.6               | 0.1 | 0.7               | 0.2 | 0.9               | 3.1 | 4.7               | 3.7 | 2.6               | 1.7 | 7.6               | 0.2 |
| 06C-07G    | 3.7                    | 0.2 | 4.3               | 0.3 | 0.6               | 0.1 | 3.0               | 0.1 | 1.1               | 0.1 | 8.2               | 0.2 | -1.0              | 2.3 | -0.7              | 1.3 | -1.0              | 2.3 | -1.0              | 0.1 |
| 07G-06C    | -4.1                   | 0.2 | -4.7              | 0.3 | -1.0              | 0.1 | -3.5              | 0.1 | -1.5              | 0.1 | -8.7              | 0.2 | 0.5               | 2.3 | 0.3               | 1.4 | 2.8               | 0.9 | 2.0               | 0.1 |
| 08C-05G    | 0.6                    | 0.5 | 0.6               | 0.7 | 0.2               | 0.1 | -3.2              | 0.1 | -1.8              | 0.1 | -1.0              | 0.2 | -1.3              | 3.1 | -4.9              | 3.7 | -3.9              | 0.4 | -7.4              | 0.2 |
| 09G-04C    | 11.3                   | 0.4 | 8.8               | 0.7 | 9.3               | 0.2 | 8.2               | 0.1 | 11.8              | 0.1 | 9.4               | 0.2 | 4.7               | 8.2 | -13.5             | 7.0 | -5.9              | 7.3 | 6.6               | 0.3 |
| 10T-03A    | 1.2                    | 0.3 | 3.5               | 0.3 | 4.6               | 0.1 | -2.2              | 0.1 | 3.4               | 0.1 | 2.4               | 0.3 | 3.6               | 3.1 | -5.2              | 1.6 | 0.9               | 1.8 | -5.7              | 0.2 |
| 11A-02T    | 3.7                    | 0.3 | 7.6               | 0.5 | 5.6               | 0.1 | 5.0               | 0.3 | 5.1               | 0.1 | 4.8               | 0.3 | 0.3               | 2.6 | -3.1              | 1.0 | 0.1               | 2.0 | 4.9               | 0.1 |
| 12G-01C    | 8.9                    | 0.4 | 11.0              | 0.1 | 10.8              | 0.5 | 11.7              | 2.2 | 10.5              | 0.6 | 7.9               | 0.8 | 5.7               | 1.7 | 0.7               | 1.2 | 6.5               | 0.8 | 10.2              | 0.5 |

| Propeller (°) |                        |     |                   |     |                   |     |                   |     |                   |     |                   |     |                   |     |                   |     |                   |     |                   |     |
|---------------|------------------------|-----|-------------------|-----|-------------------|-----|-------------------|-----|-------------------|-----|-------------------|-----|-------------------|-----|-------------------|-----|-------------------|-----|-------------------|-----|
| Base Pair     | DNA <sup>control</sup> |     | DNA <sup>M6</sup> |     | DNA <sup>M8</sup> |     | DNA <sup>M3</sup> |     | DNA <sup>H6</sup> |     | DNA <sup>H8</sup> |     | DNA <sup>H3</sup> |     | DNA <sup>F6</sup> |     | DNA <sup>F8</sup> |     | DNA <sup>F3</sup> |     |
|               | Avg                    | Std | Avg               | Std | Avg               | Std | Avg               | Std | Avg               | Std | Avg               | Std | Avg               | Std | Avg               | Std | Avg               | Std | Avg               | Std |
| 01C-12G       | -12.5                  | 0.8 | -1.9              | 0.9 | -13.9             | 0.4 | -6.7              | 0.3 | -8.2              | 0.4 | -11.7             | 2.2 | -10.4             | 2.6 | -5.5              | 1.1 | -5.7              | 2.4 | -7.9              | 1.8 |
| 02T-11A       | -5.8                   | 0.8 | -6.3              | 0.6 | -5.0              | 0.3 | -8.4              | 0.6 | -6.0              | 0.3 | -8.4              | 1.1 | -16.2             | 1.0 | -24.8             | 3.7 | -9.4              | 2.4 | -11.6             | 0.9 |
| 03A-10T       | -14.8                  | 5.2 | -12.1             | 4.2 | -10.5             | 0.4 | -7.8              | 0.5 | -20.9             | 0.3 | -12.8             | 2.7 | -11.8             | 2.6 | -9.0              | 4.3 | -18.7             | 1.6 | -17.4             | 0.5 |
| 04C-09G       | -14.9                  | 0.7 | -14.1             | 0.3 | -11.0             | 0.4 | -10.3             | 0.4 | -10.2             | 0.3 | -11.3             | 0.3 | -10.3             | 1.8 | -25.7             | 4.8 | -16.5             | 3.3 | -11.1             | 0.2 |
| 05G-08C       | -9.0                   | 0.5 | -4.8              | 1.0 | -5.5              | 0.3 | -15.4             | 0.3 | -10.2             | 0.3 | -9.7              | 0.2 | -9.4              | 4.2 | -18.8             | 1.9 | -18.7             | 0.8 | -19.6             | 0.4 |
| 06C-07G       | -12.1                  | 0.8 | 4.6               | 0.7 | -9.8              | 0.4 | -14.2             | 0.4 | -8.2              | 0.2 | -13.9             | 0.2 | -13.4             | 5.3 | -23.5             | 1.5 | -18.5             | 1.3 | -2.3              | 0.8 |
| 07G-06C       | -12.3                  | 0.8 | 4.5               | 0.7 | -10.0             | 0.4 | -14.4             | 0.4 | -8.4              | 0.2 | -14.1             | 0.2 | -13.6             | 5.3 | -23.7             | 1.4 | -17.5             | 2.7 | -2.1              | 0.8 |
| 08C-05G       | -8.7                   | 0.6 | -4.1              | 1.0 | -5.1              | 0.3 | -15.1             | 0.3 | -9.8              | 0.3 | -9.4              | 0.2 | -9.0              | 4.2 | -18.5             | 2.1 | -16.1             | 2.3 | -20.3             | 0.4 |
| 09G-04C       | -14.9                  | 0.7 | -14.6             | 0.3 | -11.0             | 0.4 | -10.3             | 0.4 | -10.2             | 0.2 | -11.4             | 0.3 | -10.4             | 1.9 | -25.8             | 4.7 | -15.8             | 4.3 | -12.4             | 0.2 |
| 10T-03A       | -14.8                  | 5.2 | -12.2             | 4.2 | -10.6             | 0.4 | -7.9              | 0.5 | -20.9             | 0.3 | -12.8             | 2.7 | -11.8             | 2.5 | -9.1              | 4.2 | -19.0             | 1.2 | -16.9             | 0.5 |
| 11A-02T       | -5.7                   | 0.8 | -6.3              | 0.6 | -5.0              | 0.3 | -8.2              | 0.6 | -5.9              | 0.3 | -8.3              | 1.1 | -16.1             | 1.0 | -24.7             | 3.8 | -11.0             | 4.7 | -11.7             | 0.9 |
| 12G-01C       | -12.6                  | 0.8 | -2.0              | 0.9 | -14.0             | 0.4 | -6.8              | 0.4 | -8.3              | 0.4 | -11.8             | 2.2 | -10.5             | 2.6 | -5.6              | 1.1 | -5.8              | 2.4 | -7.9              | 1.8 |



| Opening (°) |                        |     |                   |     |                   |     |                   |     |                   |     |                   |     |                   |     |                   |     |                   |     |                   |     |
|-------------|------------------------|-----|-------------------|-----|-------------------|-----|-------------------|-----|-------------------|-----|-------------------|-----|-------------------|-----|-------------------|-----|-------------------|-----|-------------------|-----|
| Base Pair   | DNA <sup>control</sup> |     | DNA <sup>M6</sup> |     | DNA <sup>M8</sup> |     | DNA <sup>M3</sup> |     | DNA <sup>H6</sup> |     | DNA <sup>H8</sup> |     | DNA <sup>H3</sup> |     | DNA <sup>F6</sup> |     | DNA <sup>F8</sup> |     | DNA <sup>F3</sup> |     |
|             | Avg                    | Std | Avg               | Std | Avg               | Std | Avg               | Std | Avg               | Std | Avg               | Std | Avg               | Std | Avg               | Std | Avg               | Std | Avg               | Std |
| 01C-12G     | 1.4                    | 0.3 | -1.2              | 0.1 | 1.4               | 0.2 | -0.5              | 0.2 | -0.5              | 0.1 | 0.8               | 0.3 | -0.1              | 0.4 | -1.7              | 0.2 | -1.0              | 0.2 | -0.7              | 0.1 |
| 02T-11A     | -2.7                   | 0.1 | -1.8              | 0.1 | -2.9              | 0.1 | -2.2              | 0.1 | -2.3              | 0.1 | -3.1              | 0.2 | -3.6              | 0.3 | -5.2              | 1.4 | -2.7              | 0.1 | -1.7              | 0.3 |
| 03A-10T     | -2.4                   | 0.9 | -2.9              | 0.6 | -3.1              | 0.1 | -3.3              | 0.2 | -0.3              | 0.1 | -3.3              | 0.5 | -3.3              | 0.4 | -2.4              | 0.6 | -1.6              | 0.6 | -3.2              | 0.1 |
| 04C-09G     | -3.4                   | 0.4 | -2.8              | 0.3 | -2.0              | 0.2 | -1.8              | 0.1 | -3.1              | 0.1 | -2.4              | 0.1 | -2.3              | 0.2 | -3.3              | 0.5 | -1.2              | 0.9 | -1.4              | 0.1 |
| 05G-08C     | -2.2                   | 0.2 | -2.3              | 0.1 | -2.2              | 0.1 | -0.4              | 0.1 | -1.5              | 0.0 | -2.0              | 0.1 | -2.0              | 0.3 | -3.7              | 1.2 | -2.3              | 0.8 | -0.9              | 0.1 |
| 06C-07G     | -1.8                   | 0.2 | -0.4              | 0.2 | -2.5              | 0.0 | -2.5              | 0.1 | -2.5              | 0.1 | -2.5              | 0.1 | -3.3              | 1.1 | -3.5              | 1.0 | -3.5              | 0.7 | -2.3              | 0.1 |
| 07G-06C     | -1.8                   | 0.2 | -0.4              | 0.2 | -2.5              | 0.0 | -2.5              | 0.1 | -2.5              | 0.1 | -2.5              | 0.1 | -3.4              | 1.1 | -3.5              | 1.1 | -3.9              | 0.2 | -2.4              | 0.1 |
| 08C-05G     | -2.2                   | 0.2 | -2.4              | 0.1 | -2.2              | 0.1 | -0.4              | 0.1 | -1.6              | 0.0 | -2.1              | 0.1 | -2.1              | 0.3 | -3.7              | 1.2 | -2.6              | 0.3 | -1.0              | 0.1 |
| 09G-04C     | -3.5                   | 0.4 | -2.7              | 0.2 | -2.1              | 0.2 | -1.9              | 0.1 | -3.1              | 0.1 | -2.5              | 0.1 | -2.4              | 0.2 | -3.3              | 0.5 | -2.0              | 0.1 | -1.6              | 0.1 |
| 10T-03A     | -2.4                   | 0.8 | -2.9              | 0.5 | -3.1              | 0.1 | -3.3              | 0.2 | -0.4              | 0.1 | -3.3              | 0.4 | -3.3              | 0.4 | -2.4              | 0.6 | -1.7              | 0.7 | -2.9              | 0.1 |
| 11A-02T     | -2.7                   | 0.1 | -1.8              | 0.1 | -2.9              | 0.1 | -2.2              | 0.1 | -2.3              | 0.1 | -3.1              | 0.2 | -3.6              | 0.3 | -5.2              | 1.4 | -2.5              | 0.3 | -1.7              | 0.3 |
| 12G-01C     | 1.3                    | 0.3 | -1.3              | 0.1 | 1.4               | 0.2 | -0.5              | 0.2 | -0.5              | 0.1 | 0.8               | 0.3 | -0.1              | 0.4 | -1.7              | 0.2 | -1.1              | 0.2 | -0.7              | 0.1 |

| Shift (Å) |                        |      |                   |      |                   |      |                   |      |                   |      |                   |      |                   |      |                   |      |                   |      |                   |      |
|-----------|------------------------|------|-------------------|------|-------------------|------|-------------------|------|-------------------|------|-------------------|------|-------------------|------|-------------------|------|-------------------|------|-------------------|------|
| Base Pair | DNA <sup>control</sup> |      | DNA <sup>M6</sup> |      | DNA <sup>M8</sup> |      | DNA <sup>M3</sup> |      | DNA <sup>H6</sup> |      | DNA <sup>H8</sup> |      | DNA <sup>H3</sup> |      | DNA <sup>F6</sup> |      | DNA <sup>F8</sup> |      | DNA <sup>F3</sup> |      |
|           | Avg                    | Std  | Avg               | Std  | Avg               | Std  | Avg               | Std  | Avg               | Std  | Avg               | Std  | Avg               | Std  | Avg               | Std  | Avg               | Std  | Avg               | Std  |
| 01CT/11AG | -0.44                  | 0.03 | -0.40             | 0.02 | -0.43             | 0.01 | -0.45             | 0.04 | -0.37             | 0.02 | -0.48             | 0.05 | -0.46             | 0.02 | -0.54             | 0.08 | -0.47             | 0.05 | -0.43             | 0.10 |
| 02TA/10TA | -0.08                  | 0.01 | -0.11             | 0.01 | -0.07             | 0.01 | 0.03              | 0.02 | -0.11             | 0.01 | 0.02              | 0.02 | 0.02              | 0.05 | 0.01              | 0.09 | -0.11             | 0.03 | -0.05             | 0.01 |
| 03AC/09GT | -0.22                  | 0.23 | -0.16             | 0.10 | 0.01              | 0.03 | 0.09              | 0.04 | -0.31             | 0.01 | 0.01              | 0.09 | -0.05             | 0.09 | -0.18             | 0.40 | -0.23             | 0.38 | 0.11              | 0.02 |
| 04CG/08CG | -0.09                  | 0.02 | -0.05             | 0.02 | -0.08             | 0.01 | -0.14             | 0.01 | -0.13             | 0.01 | -0.20             | 0.02 | -0.21             | 0.05 | -0.36             | 0.13 | -0.19             | 0.04 | 0.10              | 0.01 |
| 05GC/07GC | 0.36                   | 0.18 | 0.37              | 0.08 | -0.22             | 0.01 | 0.00              | 0.02 | 0.20              | 0.02 | -0.22             | 0.03 | -0.44             | 0.14 | 0.09              | 0.06 | -0.22             | 0.20 | -0.05             | 0.04 |
| 06CG/06CG | 0.01                   | 0.00 | 0.01              | 0.00 | 0.01              | 0.00 | 0.01              | 0.00 | 0.01              | 0.00 | 0.01              | 0.00 | 0.01              | 0.00 | 0.01              | 0.02 | 0.02              | 0.02 | -0.03             | 0.00 |
| 07GC/05GC | -0.35                  | 0.18 | -0.35             | 0.09 | 0.24              | 0.02 | 0.02              | 0.02 | -0.18             | 0.02 | 0.23              | 0.03 | 0.45              | 0.14 | -0.08             | 0.07 | 0.25              | 0.22 | 0.02              | 0.04 |
| 08CG/04CG | 0.10                   | 0.02 | 0.05              | 0.02 | 0.09              | 0.01 | 0.15              | 0.01 | 0.14              | 0.01 | 0.21              | 0.02 | 0.21              | 0.05 | 0.37              | 0.14 | 0.20              | 0.04 | -0.14             | 0.01 |
| 09GT/03AC | 0.22                   | 0.23 | 0.16              | 0.10 | 0.00              | 0.03 | -0.08             | 0.04 | 0.31              | 0.01 | 0.00              | 0.09 | 0.06              | 0.09 | 0.18              | 0.40 | 0.26              | 0.35 | -0.12             | 0.02 |
| 10TA/02TA | 0.09                   | 0.02 | 0.12              | 0.01 | 0.08              | 0.01 | -0.02             | 0.02 | 0.12              | 0.01 | -0.01             | 0.02 | -0.01             | 0.05 | 0.00              | 0.10 | 0.15              | 0.05 | 0.03              | 0.01 |
| 11AG/01CT | 0.45                   | 0.03 | 0.41              | 0.01 | 0.44              | 0.01 | 0.46              | 0.04 | 0.38              | 0.02 | 0.49              | 0.05 | 0.47              | 0.02 | 0.55              | 0.08 | 0.50              | 0.04 | 0.40              | 0.10 |

| Slide (Å) |                        |      |                   |      |                   |      |                   |      |                   |      |                   |      |                   |      |                   |      |                   |      |                   |      |
|-----------|------------------------|------|-------------------|------|-------------------|------|-------------------|------|-------------------|------|-------------------|------|-------------------|------|-------------------|------|-------------------|------|-------------------|------|
| Base Pair | DNA <sup>control</sup> |      | DNA <sup>M6</sup> |      | DNA <sup>M8</sup> |      | DNA <sup>M3</sup> |      | DNA <sup>H6</sup> |      | DNA <sup>H8</sup> |      | DNA <sup>H3</sup> |      | DNA <sup>F6</sup> |      | DNA <sup>F8</sup> |      | DNA <sup>F3</sup> |      |
|           | Avg                    | Std  | Avg               | Std  | Avg               | Std  | Avg               | Std  | Avg               | Std  | Avg               | Std  | Avg               | Std  | Avg               | Std  | Avg               | Std  | Avg               | Std  |
| 01CT/11AG | -0.13                  | 0.01 | 0.18              | 0.03 | -0.27             | 0.01 | -0.18             | 0.02 | 0.03              | 0.01 | -0.38             | 0.05 | -0.61             | 0.05 | -0.27             | 0.06 | 0.16              | 0.04 | 0.31              | 0.04 |
| 02TA/10TA | 0.02                   | 0.10 | 0.21              | 0.07 | 0.02              | 0.02 | -0.07             | 0.04 | 0.29              | 0.01 | -0.17             | 0.06 | -0.32             | 0.09 | 0.00              | 0.22 | 0.23              | 0.10 | 0.29              | 0.03 |
| 03AC/09GT | -0.76                  | 0.06 | -0.57             | 0.03 | -0.60             | 0.01 | -0.87             | 0.02 | -0.69             | 0.01 | -0.88             | 0.03 | -0.85             | 0.07 | -0.64             | 0.58 | -0.22             | 0.13 | -1.05             | 0.02 |
| 04CG/08CG | 0.74                   | 0.09 | 0.74              | 0.03 | 0.61              | 0.02 | 0.60              | 0.01 | 0.68              | 0.01 | 0.41              | 0.02 | 0.26              | 0.08 | 0.29              | 0.12 | 0.31              | 0.27 | 0.44              | 0.01 |
| 05GC/07GC | 0.71                   | 0.04 | 0.79              | 0.06 | 0.65              | 0.01 | 0.30              | 0.01 | 0.53              | 0.01 | 0.55              | 0.02 | 0.43              | 0.19 | -0.11             | 0.14 | -0.10             | 0.27 | -1.24             | 0.04 |
| 06CG/06CG | 0.51                   | 0.04 | 0.68              | 0.09 | 0.69              | 0.02 | 0.38              | 0.01 | 0.34              | 0.01 | 0.59              | 0.05 | 0.46              | 0.21 | 0.45              | 0.04 | 0.12              | 0.17 | 0.29              | 0.04 |
| 07GC/05GC | 0.71                   | 0.04 | 0.79              | 0.06 | 0.65              | 0.01 | 0.30              | 0.01 | 0.53              | 0.01 | 0.55              | 0.02 | 0.43              | 0.19 | -0.11             | 0.14 | -0.19             | 0.14 | -1.24             | 0.04 |
| 08CG/04CG | 0.74                   | 0.10 | 0.74              | 0.04 | 0.62              | 0.02 | 0.60              | 0.02 | 0.68              | 0.01 | 0.41              | 0.01 | 0.26              | 0.08 | 0.29              | 0.12 | 0.22              | 0.14 | 0.41              | 0.01 |
| 09GT/03AC | -0.76                  | 0.05 | -0.56             | 0.03 | -0.60             | 0.02 | -0.87             | 0.02 | -0.69             | 0.01 | -0.88             | 0.03 | -0.85             | 0.07 | -0.63             | 0.58 | -0.28             | 0.21 | -1.05             | 0.01 |
| 10TA/02TA | 0.02                   | 0.10 | 0.21              | 0.07 | 0.01              | 0.02 | -0.07             | 0.04 | 0.28              | 0.01 | -0.17             | 0.06 | -0.33             | 0.08 | 0.00              | 0.23 | 0.26              | 0.05 | 0.30              | 0.03 |
| 11AG/01CT | -0.13                  | 0.01 | 0.18              | 0.03 | -0.27             | 0.01 | -0.18             | 0.02 | 0.03              | 0.01 | -0.38             | 0.05 | -0.61             | 0.05 | -0.27             | 0.07 | 0.18              | 0.02 | 0.31              | 0.04 |

| Roll (°)  |                        |     |                   |     |                   |     |                   |     |                   |     |                   |     |                   |     |                   |     |                   |     |                   |     |
|-----------|------------------------|-----|-------------------|-----|-------------------|-----|-------------------|-----|-------------------|-----|-------------------|-----|-------------------|-----|-------------------|-----|-------------------|-----|-------------------|-----|
| Base Pair | DNA <sup>control</sup> |     | DNA <sup>M6</sup> |     | DNA <sup>M8</sup> |     | DNA <sup>M3</sup> |     | DNA <sup>H6</sup> |     | DNA <sup>H8</sup> |     | DNA <sup>H3</sup> |     | DNA <sup>F6</sup> |     | DNA <sup>F8</sup> |     | DNA <sup>F3</sup> |     |
|           | Avg                    | Std | Avg               | Std | Avg               | Std | Avg               | Std | Avg               | Std | Avg               | Std | Avg               | Std | Avg               | Std | Avg               | Std | Avg               | Std |
| 01CT/11AG | 13.8                   | 0.1 | 17.0              | 0.8 | 9.8               | 0.3 | 7.6               | 0.9 | 13.9              | 0.3 | 8.1               | 1.9 | 4.4               | 1.5 | 3.8               | 2.0 | 12.7              | 2.8 | 16.3              | 2.1 |
| 02TA/10TA | 10.9                   | 2.9 | 9.4               | 2.1 | 6.0               | 0.1 | 5.2               | 0.8 | 12.4              | 0.1 | 9.4               | 2.0 | 2.7               | 1.0 | 18.8              | 1.3 | 7.8               | 2.7 | 7.0               | 0.5 |
| 03AC/09GT | 5.5                    | 2.2 | 6.2               | 2.0 | 5.5               | 0.1 | 4.9               | 0.3 | 2.8               | 0.1 | 5.5               | 1.3 | 3.6               | 4.3 | -9.9              | 4.3 | -1.1              | 3.3 | 3.4               | 0.2 |
| 04CG/08CG | -0.8                   | 0.5 | 2.7               | 0.6 | 1.5               | 0.0 | -2.7              | 0.1 | -4.0              | 0.2 | 0.6               | 0.2 | 0.5               | 2.8 | -2.4              | 4.1 | 0.4               | 4.9 | 7.7               | 0.3 |
| 05GC/07GC | -2.0                   | 0.2 | 0.2               | 0.3 | 2.7               | 0.1 | 3.0               | 0.1 | 2.4               | 0.1 | -1.7              | 0.1 | -0.3              | 4.2 | -9.3              | 1.7 | -5.3              | 0.7 | -8.8              | 0.2 |
| 06CG/06CG | 8.4                    | 0.5 | -2.0              | 0.8 | 2.5               | 0.1 | 1.7               | 0.3 | 3.5               | 0.1 | 8.6               | 0.4 | -2.6              | 0.2 | -0.3              | 1.3 | -4.6              | 1.0 | 11.2              | 0.1 |
| 07GC/05GC | -1.9                   | 0.2 | 0.0               | 0.2 | 2.8               | 0.1 | 3.0               | 0.1 | 2.5               | 0.1 | -1.6              | 0.1 | -0.2              | 4.2 | -9.3              | 1.6 | -5.4              | 0.6 | -9.4              | 0.2 |
| 08CG/04CG | -0.7                   | 0.5 | 3.3               | 0.6 | 1.6               | 0.0 | -2.6              | 0.1 | -3.9              | 0.2 | 0.6               | 0.2 | 0.5               | 2.8 | -2.2              | 4.1 | -1.0              | 2.7 | 7.9               | 0.3 |
| 09GT/03AC | 5.5                    | 2.2 | 6.0               | 2.0 | 5.4               | 0.1 | 4.9               | 0.3 | 2.7               | 0.1 | 5.5               | 1.3 | 3.6               | 4.3 | -9.9              | 4.3 | -1.5              | 2.8 | 2.6               | 0.2 |
| 10TA/02TA | 10.9                   | 2.9 | 9.4               | 2.1 | 6.1               | 0.1 | 5.2               | 0.9 | 12.4              | 0.1 | 9.4               | 2.0 | 2.7               | 1.0 | 18.8              | 1.1 | 7.6               | 3.0 | 7.5               | 0.5 |
| 11AG/01CT | 13.8                   | 0.1 | 17.0              | 0.8 | 9.8               | 0.3 | 7.6               | 0.9 | 13.9              | 0.3 | 8.1               | 1.9 | 4.4               | 1.5 | 3.8               | 2.0 | 13.8              | 2.2 | 16.1              | 2.1 |

| Tilt (°)  |                        |     |                   |     |                   |     |                   |     |                   |     |                   |     |                   |     |                   |     |                   |     |                   |     |
|-----------|------------------------|-----|-------------------|-----|-------------------|-----|-------------------|-----|-------------------|-----|-------------------|-----|-------------------|-----|-------------------|-----|-------------------|-----|-------------------|-----|
| Base Pair | DNA <sup>control</sup> |     | DNA <sup>M6</sup> |     | DNA <sup>M8</sup> |     | DNA <sup>M3</sup> |     | DNA <sup>H6</sup> |     | DNA <sup>H8</sup> |     | DNA <sup>H3</sup> |     | DNA <sup>F6</sup> |     | DNA <sup>F8</sup> |     | DNA <sup>F3</sup> |     |
|           | Avg                    | Std | Avg               | Std | Avg               | Std | Avg               | Std | Avg               | Std | Avg               | Std | Avg               | Std | Avg               | Std | Avg               | Std | Avg               | Std |
| 01CT/11AG | 0.2                    | 0.3 | 2.6               | 0.3 | -0.3              | 0.1 | 0.7               | 1.2 | 1.9               | 0.2 | -0.2              | 0.6 | 4.0               | 0.6 | 0.3               | 0.5 | 0.9               | 1.5 | 2.7               | 1.2 |
| 02TA/10TA | -1.2                   | 0.3 | -1.7              | 0.2 | 0.3               | 0.1 | -2.7              | 0.1 | -0.5              | 0.1 | 0.4               | 0.1 | -0.3              | 0.3 | 1.1               | 0.4 | 1.0               | 0.7 | -5.8              | 0.2 |
| 03AC/09GT | 0.7                    | 0.8 | -1.1              | 0.6 | 0.0               | 0.2 | 1.3               | 0.1 | -4.2              | 0.1 | -0.7              | 0.3 | -1.3              | 0.2 | 0.1               | 1.4 | -0.3              | 2.5 | 0.6               | 0.1 |
| 04CG/08CG | 4.0                    | 0.1 | 4.2               | 0.1 | 3.5               | 0.1 | 4.4               | 0.1 | 4.4               | 0.1 | 3.7               | 0.1 | 0.9               | 3.0 | -5.3              | 4.8 | -3.5              | 1.3 | 2.0               | 0.1 |
| 05GC/07GC | 0.4                    | 0.6 | -5.6              | 0.4 | -1.8              | 0.1 | -1.9              | 0.1 | -1.3              | 0.1 | -1.3              | 0.1 | -1.9              | 0.9 | 0.3               | 0.8 | -1.5              | 0.4 | -1.7              | 0.1 |
| 06CG/06CG | 0.0                    | 0.0 | 0.0               | 0.0 | 0.0               | 0.0 | 0.0               | 0.0 | 0.0               | 0.0 | 0.0               | 0.0 | 0.0               | 0.0 | 0.0               | 1.3 | -0.9              | 1.2 | -0.2              | 0.0 |
| 07GC/05GC | -0.1                   | 0.6 | 5.9               | 0.4 | 2.1               | 0.1 | 2.2               | 0.1 | 1.6               | 0.1 | 1.5               | 0.1 | 2.1               | 0.9 | -0.1              | 0.9 | 1.6               | 0.2 | 0.9               | 0.1 |
| 08CG/04CG | -4.0                   | 0.1 | -3.8              | 0.1 | -3.4              | 0.1 | -4.4              | 0.1 | -4.3              | 0.1 | -3.6              | 0.1 | -0.8              | 3.0 | 5.4               | 4.9 | 3.3               | 1.7 | -2.5              | 0.1 |
| 09GT/03AC | -0.7                   | 0.8 | 0.7               | 0.5 | -0.1              | 0.2 | -1.4              | 0.1 | 4.1               | 0.1 | 0.7               | 0.3 | 1.3               | 0.2 | -0.1              | 1.5 | 2.3               | 0.2 | -0.1              | 0.1 |
| 10TA/02TA | 1.3                    | 0.3 | 1.9               | 0.2 | -0.1              | 0.1 | 2.9               | 0.1 | 0.7               | 0.1 | -0.3              | 0.1 | 0.4               | 0.3 | -1.0              | 0.4 | 0.1               | 0.8 | 5.0               | 0.2 |
| 11AG/01CT | -0.2                   | 0.3 | -2.6              | 0.3 | 0.4               | 0.1 | -0.7              | 1.2 | -1.9              | 0.2 | 0.3               | 0.6 | -4.0              | 0.6 | -0.3              | 0.5 | -1.4              | 1.1 | -2.7              | 1.2 |

| $\alpha$ Torsion Angle (°) |                        |     |                   |     |                   |     |                   |     |                   |     |                   |     |                   |     |                   |     |                   |     |                   |     |
|----------------------------|------------------------|-----|-------------------|-----|-------------------|-----|-------------------|-----|-------------------|-----|-------------------|-----|-------------------|-----|-------------------|-----|-------------------|-----|-------------------|-----|
| Nucleotide                 | DNA <sup>control</sup> |     | DNA <sup>M6</sup> |     | DNA <sup>M8</sup> |     | DNA <sup>M3</sup> |     | DNA <sup>H6</sup> |     | DNA <sup>H8</sup> |     | DNA <sup>H3</sup> |     | DNA <sup>F6</sup> |     | DNA <sup>F8</sup> |     | DNA <sup>F3</sup> |     |
|                            | Avg                    | Std | Avg               | Std | Avg               | Std | Avg               | Std | Avg               | Std | Avg               | Std | Avg               | Std | Avg               | Std | Avg               | Std | Avg               | Std |
| 02T                        | -66                    | 0   | -64               | 0   | -65               | 0   | -62               | 2   | -65               | 0   | -65               | 0   | -63               | 1   | -69               | 1   | -64               | 0   | -63               | 0   |
| 03A                        | -66                    | 0   | -66               | 0   | -66               | 0   | -63               | 0   | -65               | 0   | -66               | 0   | -63               | 1   | -61               | 1   | -63               | 1   | -63               | 1   |
| 04C                        | -68                    | 1   | -67               | 1   | -67               | 0   | -65               | 1   | -66               | 0   | -66               | 0   | -64               | 5   | -59               | 3   | -60               | 4   | -66               | 0   |
| 05G                        | -57                    | 1   | -59               | 1   | -58               | 1   | -56               | 1   | -57               | 1   | -56               | 1   | -58               | 2   | -58               | 3   | -55               | 1   | -59               | 2   |
| 06C                        | -57                    | 1   | -62               | 1   | -60               | 1   | -60               | 1   | -60               | 1   | -59               | 1   | -59               | 1   | -65               | 1   | -59               | 1   | -63               | 1   |
| 07G                        | -62                    | 1   | -59               | 1   | -60               | 1   | -59               | 0   | -61               | 0   | -61               | 0   | -60               | 2   | -58               | 1   | -59               | 1   | -62               | 1   |
| 08C                        | -58                    | 0   | -59               | 1   | -59               | 0   | -60               | 0   | -60               | 0   | -56               | 0   | -58               | 0   | -59               | 1   | -59               | 3   | -56               | 1   |
| 09G                        | -57                    | 1   | -58               | 0   | -56               | 0   | -57               | 0   | -58               | 0   | -55               | 0   | -58               | 0   | -58               | 1   | -58               | 1   | -65               | 0   |
| 10T                        | -63                    | 0   | -64               | 0   | -62               | 0   | -62               | 0   | -64               | 0   | -61               | 2   | -59               | 1   | -64               | 1   | -62               | 1   | -65               | 0   |
| 11A                        | -64                    | 1   | -63               | 1   | -61               | 0   | -63               | 0   | -64               | 0   | -62               | 0   | -57               | 1   | -60               | 1   | -60               | 1   | -63               | 1   |

| <b><math>\beta</math> Torsion Angle (°)</b> |                              |     |                         |     |                         |     |                         |     |                         |     |                         |     |                         |     |                         |     |                         |     |                         |     |
|---------------------------------------------|------------------------------|-----|-------------------------|-----|-------------------------|-----|-------------------------|-----|-------------------------|-----|-------------------------|-----|-------------------------|-----|-------------------------|-----|-------------------------|-----|-------------------------|-----|
| <b>Nucleotide</b>                           | <b>DNA<sup>control</sup></b> |     | <b>DNA<sup>M6</sup></b> |     | <b>DNA<sup>M8</sup></b> |     | <b>DNA<sup>M3</sup></b> |     | <b>DNA<sup>H6</sup></b> |     | <b>DNA<sup>H8</sup></b> |     | <b>DNA<sup>H3</sup></b> |     | <b>DNA<sup>F6</sup></b> |     | <b>DNA<sup>F8</sup></b> |     | <b>DNA<sup>F3</sup></b> |     |
|                                             | Avg                          | Std | Avg                     | Std | Avg                     | Std | Avg                     | Std | Avg                     | Std | Avg                     | Std | Avg                     | Std | Avg                     | Std | Avg                     | Std | Avg                     | Std |
| 02T                                         | 184                          | 1   | 184                     | 1   | 181                     | 0   | 187                     | 0   | 183                     | 0   | 183                     | 0   | 181                     | 0   | 165                     | 2   | 184                     | 3   | 184                     | 3   |
| 03A                                         | 174                          | 2   | 176                     | 1   | 179                     | 0   | 176                     | 1   | 175                     | 0   | 177                     | 1   | 179                     | 3   | 179                     | 1   | 176                     | 5   | 171                     | 1   |
| 04C                                         | 171                          | 0   | 170                     | 0   | 173                     | 0   | 170                     | 0   | 170                     | 0   | 172                     | 0   | 176                     | 4   | 170                     | 14  | 179                     | 4   | 165                     | 0   |
| 05G                                         | 183                          | 1   | 182                     | 0   | 181                     | 0   | 184                     | 0   | 182                     | 0   | 184                     | 0   | 178                     | 6   | 173                     | 10  | 175                     | 1   | 179                     | 1   |
| 06C                                         | 174                          | 1   | 180                     | 1   | 179                     | 0   | 176                     | 0   | 181                     | 0   | 176                     | 1   | 182                     | 1   | 164                     | 4   | 178                     | 2   | 169                     | 1   |
| 07G                                         | 179                          | 1   | 177                     | 1   | 180                     | 0   | 179                     | 0   | 178                     | 0   | 181                     | 1   | 180                     | 2   | 172                     | 2   | 178                     | 2   | 181                     | 1   |
| 08C                                         | 183                          | 1   | 183                     | 0   | 183                     | 0   | 179                     | 0   | 181                     | 0   | 182                     | 0   | 179                     | 5   | 173                     | 1   | 170                     | 7   | 160                     | 0   |
| 09G                                         | 177                          | 1   | 175                     | 1   | 175                     | 0   | 177                     | 0   | 176                     | 0   | 176                     | 0   | 176                     | 1   | 172                     | 2   | 176                     | 1   | 183                     | 0   |
| 10T                                         | 169                          | 10  | 175                     | 7   | 179                     | 0   | 182                     | 0   | 164                     | 0   | 178                     | 7   | 181                     | 4   | 173                     | 4   | 172                     | 7   | 166                     | 0   |
| 11A                                         | 182                          | 1   | 182                     | 1   | 182                     | 0   | 182                     | 0   | 181                     | 0   | 181                     | 0   | 177                     | 4   | 174                     | 2   | 175                     | 2   | 181                     | 0   |

| <b><math>\gamma</math> Torsion Angle (°)</b> |                              |     |                         |     |                         |     |                         |     |                         |     |                         |     |                         |     |                         |     |                         |     |                         |     |
|----------------------------------------------|------------------------------|-----|-------------------------|-----|-------------------------|-----|-------------------------|-----|-------------------------|-----|-------------------------|-----|-------------------------|-----|-------------------------|-----|-------------------------|-----|-------------------------|-----|
| <b>Nucleotide</b>                            | <b>DNA<sup>control</sup></b> |     | <b>DNA<sup>M6</sup></b> |     | <b>DNA<sup>M8</sup></b> |     | <b>DNA<sup>M3</sup></b> |     | <b>DNA<sup>H6</sup></b> |     | <b>DNA<sup>H8</sup></b> |     | <b>DNA<sup>H3</sup></b> |     | <b>DNA<sup>F6</sup></b> |     | <b>DNA<sup>F8</sup></b> |     | <b>DNA<sup>F3</sup></b> |     |
|                                              | Avg                          | Std | Avg                     | Std | Avg                     | Std | Avg                     | Std | Avg                     | Std | Avg                     | Std | Avg                     | Std | Avg                     | Std | Avg                     | Std | Avg                     | Std |
| 02T                                          | 51                           | 1   | 52                      | 0   | 54                      | 0   | 47                      | 2   | 52                      | 0   | 50                      | 2   | 54                      | 1   | 61                      | 1   | 52                      | 2   | 51                      | 3   |
| 03A                                          | 55                           | 1   | 53                      | 1   | 54                      | 0   | 53                      | 1   | 55                      | 0   | 51                      | 1   | 53                      | 2   | 59                      | 1   | 54                      | 2   | 56                      | 1   |
| 04C                                          | 57                           | 1   | 57                      | 1   | 54                      | 1   | 58                      | 1   | 57                      | 1   | 55                      | 1   | 51                      | 3   | 60                      | 11  | 50                      | 4   | 57                      | 1   |
| 05G                                          | 55                           | 1   | 54                      | 1   | 56                      | 1   | 56                      | 1   | 57                      | 1   | 53                      | 1   | 55                      | 2   | 54                      | 3   | 58                      | 2   | 58                      | 1   |
| 06C                                          | 56                           | 1   | 54                      | 1   | 55                      | 1   | 53                      | 1   | 52                      | 1   | 54                      | 1   | 54                      | 1   | 60                      | 1   | 54                      | 2   | 56                      | 1   |
| 07G                                          | 53                           | 1   | 60                      | 1   | 54                      | 0   | 56                      | 0   | 55                      | 0   | 53                      | 0   | 54                      | 1   | 61                      | 1   | 55                      | 2   | 53                      | 1   |
| 08C                                          | 52                           | 0   | 53                      | 0   | 48                      | 0   | 51                      | 0   | 53                      | 0   | 47                      | 0   | 52                      | 4   | 59                      | 2   | 58                      | 2   | 68                      | 0   |
| 09G                                          | 57                           | 0   | 58                      | 0   | 57                      | 0   | 57                      | 0   | 58                      | 0   | 54                      | 0   | 55                      | 2   | 62                      | 1   | 57                      | 1   | 50                      | 0   |
| 10T                                          | 53                           | 7   | 49                      | 6   | 48                      | 0   | 47                      | 0   | 60                      | 0   | 47                      | 6   | 46                      | 5   | 54                      | 3   | 53                      | 4   | 59                      | 0   |
| 11A                                          | 49                           | 1   | 51                      | 0   | 51                      | 0   | 50                      | 0   | 52                      | 0   | 49                      | 1   | 56                      | 3   | 56                      | 4   | 56                      | 1   | 52                      | 0   |



| <b>δ Torsion Angle (°)</b> |                              |     |                         |     |                         |     |                         |     |                         |     |                         |     |                         |     |                         |     |                         |     |                         |     |  |
|----------------------------|------------------------------|-----|-------------------------|-----|-------------------------|-----|-------------------------|-----|-------------------------|-----|-------------------------|-----|-------------------------|-----|-------------------------|-----|-------------------------|-----|-------------------------|-----|--|
| <b>Nucleotide</b>          | <b>DNA<sup>control</sup></b> |     | <b>DNA<sup>M6</sup></b> |     | <b>DNA<sup>M8</sup></b> |     | <b>DNA<sup>M3</sup></b> |     | <b>DNA<sup>H6</sup></b> |     | <b>DNA<sup>H8</sup></b> |     | <b>DNA<sup>H3</sup></b> |     | <b>DNA<sup>F6</sup></b> |     | <b>DNA<sup>F8</sup></b> |     | <b>DNA<sup>F3</sup></b> |     |  |
|                            | Avg                          | Std | Avg                     | Std | Avg                     | Std | Avg                     | Std | Avg                     | Std | Avg                     | Std | Avg                     | Std | Avg                     | Std | Avg                     | Std | Avg                     | Std |  |
| 02T                        | 135                          | 1   | 134                     | 1   | 134                     | 1   | 134                     | 1   | 132                     | 0   | 133                     | 2   | 134                     | 1   | 88                      | 1   | 133                     | 2   | 134                     | 4   |  |
| 03A                        | 127                          | 1   | 124                     | 0   | 130                     | 0   | 127                     | 0   | 126                     | 0   | 127                     | 0   | 132                     | 3   | 140                     | 3   | 128                     | 5   | 127                     | 0   |  |
| 04C                        | 95                           | 1   | 94                      | 1   | 97                      | 0   | 101                     | 0   | 96                      | 0   | 96                      | 0   | 111                     | 14  | 123                     | 31  | 123                     | 20  | 90                      | 1   |  |
| 05G                        | 135                          | 1   | 134                     | 1   | 132                     | 0   | 136                     | 0   | 135                     | 0   | 136                     | 0   | 137                     | 2   | 139                     | 3   | 135                     | 4   | 139                     | 0   |  |
| 06C                        | 128                          | 2   | 129                     | 1   | 128                     | 1   | 129                     | 0   | 131                     | 0   | 127                     | 1   | 137                     | 0   | 99                      | 5   | 128                     | 3   | 91                      | 0   |  |
| 07G                        | 132                          | 0   | 131                     | 1   | 130                     | 0   | 132                     | 0   | 130                     | 0   | 131                     | 0   | 134                     | 2   | 134                     | 3   | 133                     | 1   | 140                     | 0   |  |
| 08C                        | 133                          | 1   | 134                     | 1   | 127                     | 0   | 129                     | 0   | 130                     | 0   | 129                     | 0   | 133                     | 3   | 127                     | 3   | 114                     | 16  | 88                      | 0   |  |
| 09G                        | 138                          | 0   | 137                     | 1   | 136                     | 0   | 140                     | 0   | 136                     | 0   | 137                     | 1   | 136                     | 1   | 135                     | 1   | 131                     | 4   | 141                     | 0   |  |
| 10T                        | 105                          | 17  | 113                     | 12  | 123                     | 1   | 122                     | 1   | 90                      | 0   | 116                     | 13  | 125                     | 4   | 100                     | 3   | 104                     | 13  | 90                      | 0   |  |
| 11A                        | 135                          | 0   | 134                     | 1   | 137                     | 0   | 133                     | 0   | 133                     | 0   | 135                     | 1   | 132                     | 2   | 133                     | 2   | 128                     | 4   | 132                     | 1   |  |

| $\epsilon$ Torsion Angle ( $^{\circ}$ ) |                        |     |                   |     |                   |     |                   |     |                   |     |                   |     |                   |     |                   |     |                   |     |                   |     |
|-----------------------------------------|------------------------|-----|-------------------|-----|-------------------|-----|-------------------|-----|-------------------|-----|-------------------|-----|-------------------|-----|-------------------|-----|-------------------|-----|-------------------|-----|
| Nucleotide                              | DNA <sup>control</sup> |     | DNA <sup>M6</sup> |     | DNA <sup>M8</sup> |     | DNA <sup>M3</sup> |     | DNA <sup>H6</sup> |     | DNA <sup>H8</sup> |     | DNA <sup>H3</sup> |     | DNA <sup>F6</sup> |     | DNA <sup>F8</sup> |     | DNA <sup>F3</sup> |     |
|                                         | Avg                    | Std | Avg               | Std | Avg               | Std | Avg               | Std | Avg               | Std | Avg               | Std | Avg               | Std | Avg               | Std | Avg               | Std | Avg               | Std |
| 02T                                     | -171                   | 1   | -171              | 1   | -171              | 0   | -174              | 0   | -171              | 0   | -171              | 1   | -177              | 0   | -154              | 1   | -175              | 2   | -173              | 1   |
| 03A                                     | -172                   | 1   | -172              | 1   | -172              | 0   | -173              | 1   | -173              | 0   | -175              | 1   | -176              | 5   | -178              | 1   | -180              | 5   | -174              | 0   |
| 04C                                     | -181                   | 0   | -176              | 1   | -178              | 0   | -182              | 0   | -180              | 0   | -181              | 0   | -179              | 1   | -171              | 5   | -184              | 1   | -172              | 1   |
| 05G                                     | -182                   | 0   | -175              | 0   | -179              | 0   | -180              | 0   | -180              | 0   | -181              | 0   | -181              | 1   | -175              | 1   | -182              | 1   | -182              | 0   |
| 06C                                     | -176                   | 0   | -176              | 0   | -177              | 0   | -180              | 0   | -178              | 0   | -176              | 0   | -182              | 1   | -180              | 2   | -181              | 1   | -169              | 1   |
| 07G                                     | -182                   | 0   | -180              | 1   | -178              | 0   | -179              | 0   | -178              | 0   | -181              | 0   | -183              | 0   | -180              | 2   | -181              | 5   | -185              | 0   |
| 08C                                     | -181                   | 0   | -180              | 0   | -182              | 0   | -181              | 1   | -180              | 0   | -183              | 0   | -181              | 2   | -183              | 1   | -181              | 2   | -158              | 1   |
| 09G                                     | -176                   | 1   | -173              | 0   | -174              | 0   | -179              | 0   | -174              | 0   | -177              | 1   | -180              | 2   | -180              | 3   | -175              | 1   | -178              | 0   |
| 10T                                     | -167                   | 5   | -172              | 3   | -175              | 0   | -173              | 0   | -165              | 0   | -172              | 2   | -182              | 1   | -176              | 3   | -175              | 1   | -166              | 0   |
| 11A                                     | -172                   | 1   | -166              | 1   | -176              | 0   | -176              | 0   | -169              | 0   | -175              | 1   | -176              | 1   | -171              | 1   | -166              | 1   | -168              | 0   |

| $\zeta$ Torsion Angle ( $^{\circ}$ ) |                        |     |                   |     |                   |     |                   |     |                   |     |                   |     |                   |     |                   |     |                   |     |                   |     |
|--------------------------------------|------------------------|-----|-------------------|-----|-------------------|-----|-------------------|-----|-------------------|-----|-------------------|-----|-------------------|-----|-------------------|-----|-------------------|-----|-------------------|-----|
| Nucleotide                           | DNA <sup>control</sup> |     | DNA <sup>M6</sup> |     | DNA <sup>M8</sup> |     | DNA <sup>M3</sup> |     | DNA <sup>H6</sup> |     | DNA <sup>H8</sup> |     | DNA <sup>H3</sup> |     | DNA <sup>F6</sup> |     | DNA <sup>F8</sup> |     | DNA <sup>F3</sup> |     |
|                                      | Avg                    | Std | Avg               | Std | Avg               | Std | Avg               | Std | Avg               | Std | Avg               | Std | Avg               | Std | Avg               | Std | Avg               | Std | Avg               | Std |
| 02T                                  | -107                   | 1   | -100              | 1   | -106              | 0   | -101              | 1   | -102              | 0   | -100              | 1   | -107              | 1   | -76               | 1   | -99               | 3   | -102              | 3   |
| 03A                                  | -93                    | 1   | -92               | 0   | -93               | 0   | -95               | 1   | -91               | 0   | -94               | 0   | -96               | 1   | -94               | 1   | -97               | 4   | -89               | 0   |
| 04C                                  | -93                    | 0   | -91               | 1   | -94               | 0   | -99               | 0   | -96               | 0   | -92               | 0   | -104              | 12  | -118              | 26  | -107              | 9   | -92               | 2   |
| 05G                                  | -102                   | 2   | -103              | 2   | -107              | 1   | -97               | 0   | -97               | 0   | -108              | 0   | -109              | 1   | -95               | 3   | -98               | 1   | -92               | 0   |
| 06C                                  | -99                    | 0   | -109              | 3   | -98               | 0   | -107              | 0   | -103              | 0   | -95               | 1   | -102              | 3   | -87               | 2   | -100              | 1   | -92               | 1   |
| 07G                                  | -107                   | 3   | -105              | 1   | -95               | 0   | -95               | 0   | -104              | 0   | -94               | 0   | -97               | 0   | -96               | 3   | -99               | 2   | -95               | 0   |
| 08C                                  | -101                   | 0   | -104              | 0   | -102              | 0   | -108              | 0   | -104              | 0   | -102              | 0   | -104              | 1   | -103              | 5   | -94               | 7   | -85               | 0   |
| 09G                                  | -92                    | 1   | -91               | 0   | -93               | 0   | -94               | 0   | -92               | 0   | -94               | 0   | -95               | 1   | -95               | 2   | -92               | 1   | -95               | 0   |
| 10T                                  | -90                    | 10  | -97               | 7   | -104              | 0   | -101              | 0   | -84               | 0   | -97               | 7   | -106              | 4   | -86               | 2   | -91               | 8   | -85               | 1   |
| 11A                                  | -99                    | 1   | -95               | 0   | -99               | 0   | -101              | 1   | -96               | 0   | -101              | 1   | -93               | 1   | -90               | 2   | -89               | 2   | -94               | 1   |

### X Torsion Angle (°)

| Nucleotide | DNA <sup>control</sup> |     | DNA <sup>M6</sup> |     | DNA <sup>M8</sup> |     | DNA <sup>M3</sup> |     | DNA <sup>H6</sup> |     | DNA <sup>H8</sup> |     | DNA <sup>H3</sup> |     | DNA <sup>F6</sup> |     | DNA <sup>F8</sup> |     | DNA <sup>F3</sup> |     |
|------------|------------------------|-----|-------------------|-----|-------------------|-----|-------------------|-----|-------------------|-----|-------------------|-----|-------------------|-----|-------------------|-----|-------------------|-----|-------------------|-----|
|            | Avg                    | Std | Avg               | Std | Avg               | Std | Avg               | Std | Avg               | Std | Avg               | Std | Avg               | Std | Avg               | Std | Avg               | Std | Avg               | Std |
| 02T        | -108                   | 1   | -110              | 0   | -114              | 0   | -108              | 1   | -111              | 0   | -113              | 1   | -111              | 1   | -147              | 1   | -109              | 1   | -106              | 1   |
| 03A        | -115                   | 0   | -114              | 0   | -113              | 1   | -113              | 1   | -113              | 0   | -112              | 0   | -114              | 2   | -122              | 1   | -112              | 5   | -112              | 0   |
| 04C        | -133                   | 0   | -133              | 1   | -128              | 0   | -133              | 0   | -136              | 0   | -133              | 1   | -125              | 10  | -120              | 31  | -109              | 10  | -143              | 1   |
| 05G        | -103                   | 1   | -105              | 1   | -105              | 0   | -101              | 1   | -103              | 1   | -104              | 0   | -110              | 3   | -116              | 5   | -115              | 1   | -105              | 1   |
| 06C        | -108                   | 0   | -110              | 1   | -110              | 1   | -108              | 0   | -107              | 1   | -110              | 1   | -109              | 3   | -132              | 3   | -118              | 5   | -142              | 0   |
| 07G        | -109                   | 0   | -115              | 1   | -108              | 1   | -112              | 1   | -112              | 1   | -112              | 0   | -107              | 4   | -118              | 2   | -110              | 2   | -113              | 1   |
| 08C        | -106                   | 0   | -102              | 0   | -105              | 1   | -107              | 0   | -108              | 0   | -103              | 0   | -107              | 6   | -119              | 2   | -123              | 6   | -158              | 0   |
| 09G        | -103                   | 1   | -104              | 0   | -106              | 0   | -103              | 0   | -105              | 0   | -105              | 0   | -108              | 3   | -113              | 3   | -115              | 3   | -102              | 0   |
| 10T        | -130                   | 13  | -116              | 10  | -112              | 1   | -118              | 0   | -134              | 1   | -118              | 10  | -112              | 5   | -127              | 5   | -120              | 7   | -143              | 1   |
| 11A        | -104                   | 1   | -100              | 1   | -104              | 0   | -102              | 1   | -105              | 1   | -105              | 1   | -115              | 3   | -115              | 2   | -115              | 1   | -102              | 0   |

| Sugar Phase Angle P (°) |                        |     |                   |     |                   |     |                   |     |                   |     |                   |     |                   |     |                   |     |                   |     |                   |     |
|-------------------------|------------------------|-----|-------------------|-----|-------------------|-----|-------------------|-----|-------------------|-----|-------------------|-----|-------------------|-----|-------------------|-----|-------------------|-----|-------------------|-----|
| Nucleotide              | DNA <sup>control</sup> |     | DNA <sup>M6</sup> |     | DNA <sup>M8</sup> |     | DNA <sup>M3</sup> |     | DNA <sup>H6</sup> |     | DNA <sup>H8</sup> |     | DNA <sup>H3</sup> |     | DNA <sup>F6</sup> |     | DNA <sup>F8</sup> |     | DNA <sup>F3</sup> |     |
|                         | Avg                    | Std | Avg               | Std | Avg               | Std | Avg               | Std | Avg               | Std | Avg               | Std | Avg               | Std | Avg               | Std | Avg               | Std | Avg               | Std |
| 01C                     | 69                     | 1   | 67                | 1   | 64                | 1   | 101               | 36  | 64                | 1   | 92                | 41  | 79                | 1   | 33                | 4   | 87                | 55  | 92                | 56  |
| 02T                     | 153                    | 0   | 159               | 1   | 150               | 1   | 157               | 4   | 154               | 1   | 149               | 6   | 147               | 1   | 10                | 4   | 162               | 7   | 158               | 11  |
| 03A                     | 133                    | 1   | 130               | 1   | 141               | 1   | 135               | 1   | 134               | 1   | 134               | 1   | 147               | 4   | 184               | 12  | 140               | 11  | 133               | 0   |
| 04C                     | 81                     | 1   | 76                | 1   | 83                | 1   | 92                | 1   | 84                | 0   | 83                | 1   | 108               | 27  | 131               | 50  | 132               | 41  | 78                | 1   |
| 05G                     | 172                    | 4   | 165               | 2   | 157               | 1   | 171               | 1   | 168               | 1   | 169               | 1   | 164               | 3   | 180               | 6   | 163               | 7   | 169               | 2   |
| 06C                     | 142                    | 5   | 151               | 2   | 150               | 2   | 141               | 1   | 152               | 1   | 146               | 2   | 172               | 1   | 73                | 8   | 141               | 9   | 79                | 1   |
| 07G                     | 153                    | 1   | 158               | 3   | 154               | 1   | 156               | 2   | 147               | 1   | 157               | 1   | 161               | 9   | 156               | 7   | 153               | 3   | 175               | 1   |
| 08C                     | 174                    | 7   | 174               | 2   | 149               | 1   | 144               | 1   | 156               | 1   | 152               | 1   | 155               | 11  | 135               | 6   | 110               | 34  | 74                | 0   |
| 09G                     | 167                    | 2   | 159               | 1   | 159               | 0   | 167               | 1   | 162               | 0   | 160               | 0   | 156               | 3   | 150               | 5   | 149               | 12  | 171               | 1   |
| 10T                     | 99                     | 28  | 111               | 20  | 128               | 1   | 127               | 2   | 74                | 0   | 118               | 21  | 133               | 8   | 86                | 5   | 93                | 26  | 74                | 1   |
| 11A                     | 153                    | 0   | 151               | 2   | 158               | 1   | 149               | 1   | 150               | 1   | 152               | 0   | 147               | 6   | 144               | 4   | 137               | 10  | 151               | 1   |
| 12G                     | 150                    | 0   | 154               | 1   | 150               | 0   | 152               | 1   | 152               | 0   | 148               | 1   | 146               | 1   | 148               | 1   | 152               | 2   | 152               | 2   |

| Major groove (Å) |                        |     |                   |     |                   |     |                   |     |                   |     |                   |     |                   |     |                   |     |                   |     |                   |     |
|------------------|------------------------|-----|-------------------|-----|-------------------|-----|-------------------|-----|-------------------|-----|-------------------|-----|-------------------|-----|-------------------|-----|-------------------|-----|-------------------|-----|
| Nt               | DNA <sup>control</sup> |     | DNA <sup>M6</sup> |     | DNA <sup>M8</sup> |     | DNA <sup>M3</sup> |     | DNA <sup>H6</sup> |     | DNA <sup>H8</sup> |     | DNA <sup>H3</sup> |     | DNA <sup>F6</sup> |     | DNA <sup>F8</sup> |     | DNA <sup>F3</sup> |     |
|                  | Avg                    | Std | Avg               | Std | Avg               | Std | Avg               | Std | Avg               | Std | Avg               | Std | Avg               | Std | Avg               | Std | Avg               | Std | Avg               | Std |
| 4CG              | 17.2                   | 0.3 | 17.6              | 0.1 | 16.7              | 0.1 | 17.4              | 0.1 | 17.6              | 0.1 | 17.7              | 0.1 | 17.0              | 0.6 | 17.4              | 0.2 | 17.0              | 0.6 | 14.7              | 0.9 |
| 5GC              | 17.2                   | 0.2 | 17.3              | 1.0 | 15.8              | 1.0 | 18.9              | 0.2 | 17.3              | 0.1 | 16.5              | 0.1 | 16.3              | 1.1 | 18.2              | 0.2 | 16.3              | 1.1 | 15.0              | 0.8 |
| 6CG              | 15.7                   | 0.2 | 15.9              | 1.3 | 14.4              | 1.3 | 17.5              | 0.2 | 15.9              | 0.1 | 14.7              | 0.1 | 14.9              | 0.4 | 17.3              | 0.2 | 14.9              | 0.4 | 13.9              | 1.2 |
| 7GC              | 17.2                   | 0.2 | 17.3              | 1.1 | 15.8              | 1.1 | 19.0              | 0.2 | 17.3              | 0.1 | 16.5              | 0.1 | 16.3              | 1.1 | 18.2              | 0.2 | 16.3              | 1.1 | 15.0              | 0.8 |
| 8CG              | 17.2                   | 0.3 | 17.6              | 0.1 | 16.7              | 0.1 | 17.5              | 0.1 | 17.6              | 0.1 | 17.7              | 0.1 | 17.0              | 0.5 | 17.4              | 0.2 | 17.0              | 0.5 | 14.6              | 0.9 |
| Minor groove (Å) |                        |     |                   |     |                   |     |                   |     |                   |     |                   |     |                   |     |                   |     |                   |     |                   |     |
| Nt               | DNA <sup>control</sup> |     | DNA <sup>M6</sup> |     | DNA <sup>M8</sup> |     | DNA <sup>M3</sup> |     | DNA <sup>H6</sup> |     | DNA <sup>H8</sup> |     | DNA <sup>H3</sup> |     | DNA <sup>F6</sup> |     | DNA <sup>F8</sup> |     | DNA <sup>F3</sup> |     |
|                  | Avg                    | Std | Avg               | Std | Avg               | Std | Avg               | Std | Avg               | Std | Avg               | Std | Avg               | Std | Avg               | Std | Avg               | Std | Avg               | Std |
| 4CG              | 14.0                   | 0.2 | 15.1              | 1.9 | 12.8              | 1.9 | 13.7              | 0.1 | 15.1              | 0.1 | 13.8              | 0.1 | 11.7              | 1.4 | 15.6              | 0.2 | 11.7              | 1.4 | 10.4              | 0.5 |
| 5GC              | 13.8                   | 0.1 | 15.1              | 1.7 | 12.5              | 1.7 | 13.1              | 0.1 | 15.1              | 0.1 | 13.7              | 0.1 | 11.0              | 1.6 | 15.6              | 0.2 | 11.0              | 1.6 | 10.2              | 0.7 |
| 6CG              | 14.0                   | 0.1 | 15.3              | 1.5 | 12.5              | 1.5 | 13.0              | 0.0 | 15.3              | 0.1 | 14.0              | 0.1 | 11.0              | 1.7 | 15.8              | 0.3 | 11.0              | 1.7 | 10.3              | 0.7 |
| 7GC              | 13.8                   | 0.1 | 15.1              | 1.7 | 12.5              | 1.7 | 13.1              | 0.1 | 15.1              | 0.1 | 13.7              | 0.1 | 11.0              | 1.6 | 15.6              | 0.2 | 11.0              | 1.6 | 10.2              | 0.7 |
| 8CG              | 14.0                   | 0.2 | 15.1              | 1.9 | 12.8              | 1.9 | 13.7              | 0.1 | 15.1              | 0.0 | 13.8              | 0.1 | 11.7              | 1.4 | 15.6              | 0.2 | 11.7              | 1.4 | 10.4              | 0.5 |

| DNA helical parameters from Curves+ |                        |                   |                   |                   |                   |                   |                   |                   |                   |                   |
|-------------------------------------|------------------------|-------------------|-------------------|-------------------|-------------------|-------------------|-------------------|-------------------|-------------------|-------------------|
| Sys/S.No                            | DNA <sup>control</sup> | DNA <sup>M6</sup> | DNA <sup>M8</sup> | DNA <sup>M3</sup> | DNA <sup>H6</sup> | DNA <sup>H8</sup> | DNA <sup>H3</sup> | DNA <sup>F6</sup> | DNA <sup>F8</sup> | DNA <sup>F3</sup> |
| 1                                   | 5.9                    | 11.3              | 6.6               | 6.2               | 1.8               | 6.7               | 8.3               | 11.8              | 3.4               | 6.9               |
| 2                                   | 11.3                   | 3.1               | 6.5               | 5.7               | 1.6               | 3                 | 10.6              | 8.9               | 3.4               | 6.6               |
| 3                                   | 5.8                    | 11.4              | 6.6               | 5.3               | 1.9               | 7.1               | 10.4              | 10.7              | 3.3               | 6.9               |
| 4                                   | 11.9                   | 11.4              | 6.3               | 4.7               | 1.6               | 6.7               | 10.7              | 10.7              | 7.6               | 7.3               |
| 5                                   | 5.2                    | 10.9              | 6.3               | 5                 | 1.5               | 6.6               | 10.3              | 11.7              | 7.2               | 6.8               |
| <b>Avg</b>                          | 8                      | 9.6               | 6.5               | 5.4               | 1.7               | 6                 | 10.1              | 10.8              | 5                 | 6.9               |
| <b>Stdev</b>                        | 3.3                    | 3.7               | 0.2               | 0.6               | 0.2               | 1.7               | 1                 | 1.2               | 2.2               | 0.3               |

## 7. RDC RMSD tables

| Structure used to predict (↓) | RDC RMSD (Hz)          |                   |                   |                   |                   |                   |                   |                   |                   |                   |
|-------------------------------|------------------------|-------------------|-------------------|-------------------|-------------------|-------------------|-------------------|-------------------|-------------------|-------------------|
|                               | DNA <sup>control</sup> | DNA <sup>M6</sup> | DNA <sup>M8</sup> | DNA <sup>M3</sup> | DNA <sup>H6</sup> | DNA <sup>H8</sup> | DNA <sup>H3</sup> | DNA <sup>F6</sup> | DNA <sup>F8</sup> | DNA <sup>F3</sup> |
| DNA <sup>control</sup>        | 1.81 ± 0.07            | 2.59 ± 0.04       | 1.91 ± 0.04       | 2.15 ± 0.03       | 2.01 ± 0.04       | 2.12 ± 0.05       | 2.08 ± 0.06       | 3.58 ± 0.02       | 2.51 ± 0.03       | 3.57 ± 0.06       |
| DNA <sup>M6</sup>             | 1.88 ± 0.05            | 1.73 ± 0.06       | 1.37 ± 0.03       | 1.73 ± 0.05       | 1.34 ± 0.06       | 1.61 ± 0.09       | 1.97 ± 0.05       | 2.75 ± 0.06       | 2.19 ± 0.04       | 2.81 ± 0.16       |
| DNA <sup>M8</sup>             | 2.26 ± 0.01            | 2.42 ± 0.01       | 1.09 ± 0.01       | 2.22 ± 0.01       | 1.87 ± 0.01       | 2.04 ± 0.01       | 1.72 ± 0.01       | 3.16 ± 0.02       | 2.37 ± 0.01       | 3.39 ± 0.02       |
| DNA <sup>M3</sup>             | 2.33 ± 0.01            | 2.54 ± 0.01       | 2.07 ± 0.01       | 1.21 ± 0.01       | 1.99 ± 0.01       | 2.44 ± 0.02       | 2.33 ± 0.01       | 3.57 ± 0.01       | 2.38 ± 0.00       | 2.61 ± 0.01       |
| DNA <sup>H6</sup>             | 2.04 ± 0.07            | 2.14 ± 0.00       | 1.52 ± 0.00       | 1.89 ± 0.00       | 1.46 ± 0.00       | 1.98 ± 0.01       | 1.97 ± 0.01       | 3.02 ± 0.00       | 2.41 ± 0.00       | 3.08 ± 0.00       |
| DNA <sup>H8</sup>             | 2.17 ± 0.05            | 2.48 ± 0.03       | 1.68 ± 0.00       | 2.22 ± 0.01       | 1.98 ± 0.03       | 1.54 ± 0.03       | 2.27 ± 0.02       | 3.60 ± 0.01       | 2.53 ± 0.03       | 3.78 ± 0.01       |
| DNA <sup>H3</sup>             | 2.21 ± 0.11            | 2.44 ± 0.10       | 1.42 ± 0.03       | 2.22 ± 0.12       | 1.93 ± 0.07       | 2.38 ± 0.07       | 1.22 ± 0.11       | 3.13 ± 0.09       | 2.26 ± 0.04       | 3.21 ± 0.18       |
| DNA <sup>F6</sup>             | 2.54 ± 0.05            | 1.81 ± 0.10       | 1.86 ± 0.20       | 2.47 ± 0.02       | 1.48 ± 0.06       | 2.19 ± 0.03       | 2.10 ± 0.08       | 1.75 ± 0.03       | 2.29 ± 0.01       | 2.75 ± 0.15       |
| DNA <sup>F8</sup>             | 2.31 ± 0.05            | 2.20 ± 0.04       | 2.08 ± 0.25       | 2.18 ± 0.03       | 2.22 ± 0.05       | 2.59 ± 0.23       | 2.25 ± 0.07       | 3.43 ± 0.13       | 1.33 ± 0.13       | 3.43 ± 0.21       |
| DNA <sup>F3</sup>             | 3.12 ± 0.01            | 3.15 ± 0.01       | 2.79 ± 0.00       | 2.25 ± 0.01       | 2.43 ± 0.01       | 3.08 ± 0.01       | 2.77 ± 0.01       | 3.15 ± 0.01       | 2.16 ± 0.01       | 1.75 ± 0.01       |

**Table S5:** RMSD between predicted RDCs and experimentally derived RDCs. RDCs predicted for structures refined with Xplor-NIH 2.4.1 were correlated with each of set measured RDCs of DNA<sup>control</sup> and DNA<sup>N#</sup>. Here mean ± standard deviation, represents average RMSD for 5 structures and standard deviation of RMSDs.



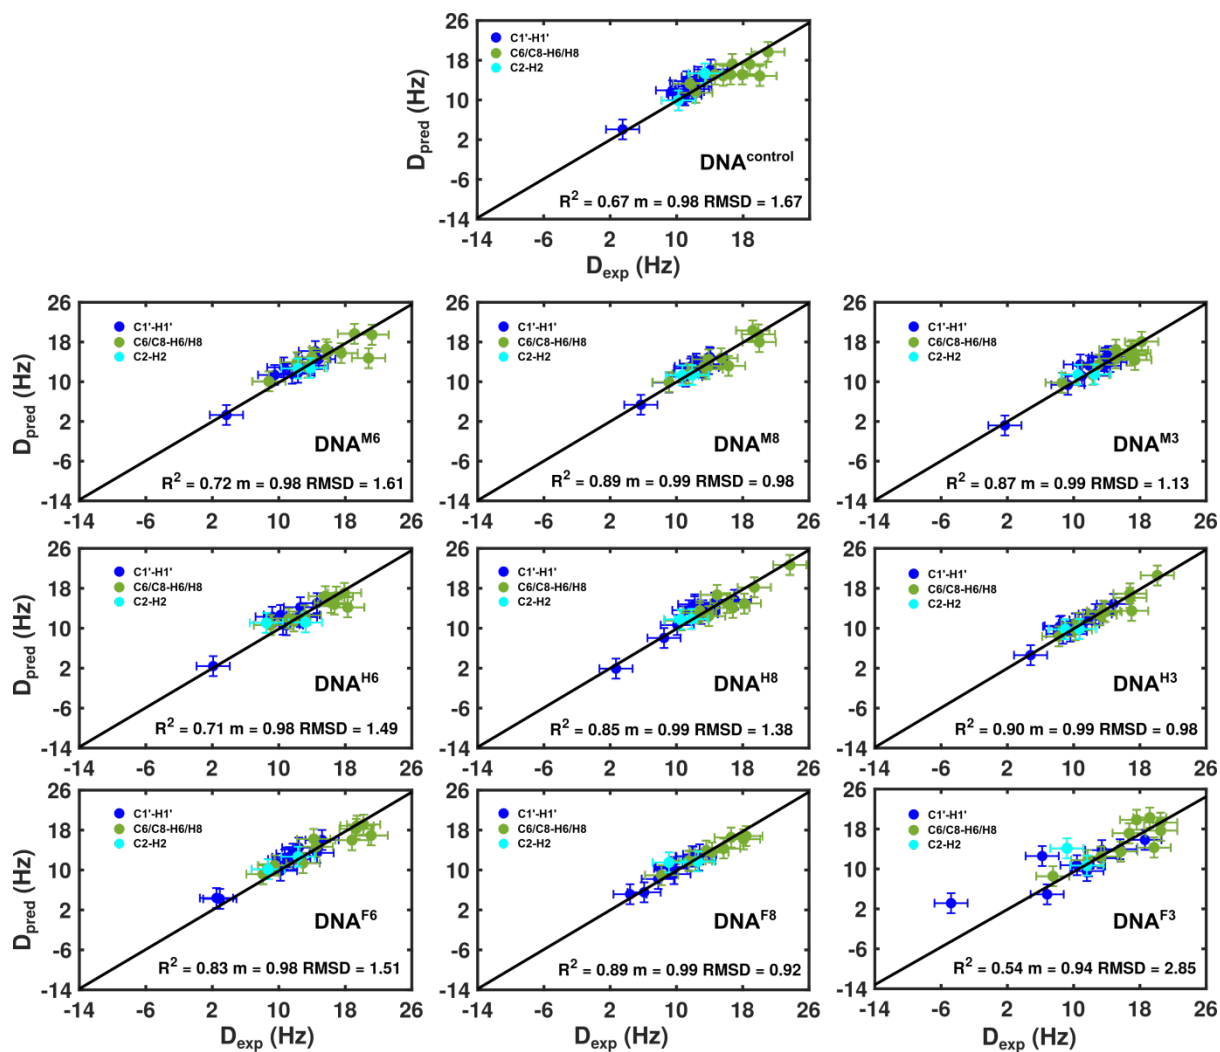

**Figure S8:** Correlation of predicted RDCs of Xplor-NIH structures with measured RDCs of respective DNA<sup>control</sup> and DNA<sup>N#</sup>, correlation coefficient ( $R^2$ ), and root mean square deviation (RMSD) between predicted and measured RDCs with slope ( $m$ ) is also provided.

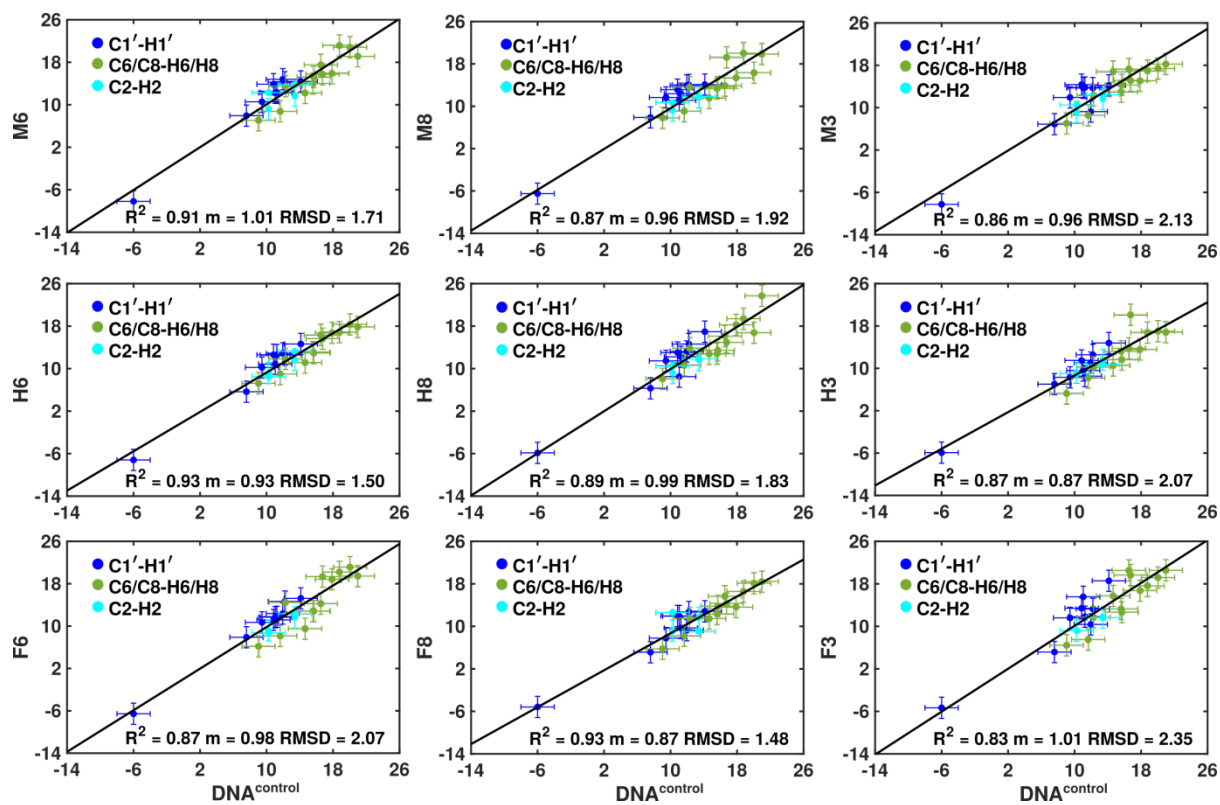

**Figure S9:** Correlation of measured RDCs of DNA<sup>N#</sup> with respect to DNA<sup>control</sup> sans modified nucleotides C1'-H1'

## REFERENCES

- (1) Sathyamoorthy, B.; Sannapureddi, R. K. R.; Negi, D.; Singh, P. Conformational Characterization of Duplex DNA with Solution-State NMR Spectroscopy. *J. Magn. Reson. Open* **2022**, 10–11, 100035. <https://doi.org/10.1016/j.jmro.2022.100035>.
- (2) Emwas, A.-H.; Alghrably, M.; Al-Harhi, S.; Gabriel Poulson, B.; Szczepski, K.; Chandra, K.; Jaremko, M. New Advances in Fast Methods of 2D NMR Experiments. In *Nuclear Magnetic Resonance*; Khaneja, N., Ed.; *IntechOpen*, **2020**. <https://doi.org/10.5772/intechopen.90263>.
- (3) Cavanagh, J.; Skelton, N.; Fairbrother, W.; Rance, M.; Palmer, I., Arthur, Protein NMR Spectroscopy- 2nd Edition. 2nd ed.; Elsevier: **2006**; p 912.
- (4) Hyberts, S. G.; Takeuchi, K.; Wagner, G. Poisson-Gap Sampling and Forward Maximum Entropy Reconstruction for Enhancing the Resolution and Sensitivity of Protein NMR Data. *J. Am. Chem. Soc.* **2010**, 132 (7), 2145–2147. <https://doi.org/10.1021/ja908004w>.
- (5) Bostock, M.; Nietlispach, D. Compressed Sensing: Reconstruction of Non-Uniformly Sampled Multidimensional NMR Data. *Concepts Magn. Reson. Part A* **2017**, 46A (2), e21438. <https://doi.org/10.1002/cmr.a.21438>.
- (6) Hyberts, S. G.; Robson, S. A.; Wagner, G. Exploring Signal-to-Noise Ratio and Sensitivity in Non-Uniformly Sampled Multi-Dimensional NMR Spectra. *J. Biomol. NMR* **2013**, 55 (2), 167–178. <https://doi.org/10.1007/s10858-012-9698-2>.
